# Supplementary material for: Organocatalytic asymmetric Michael-type reaction between β,γ-unsaturated α-keto ester and α-nitro ketone
Source: Royal Society of Chemistry journal article supplement (doi:10.1039/c1ob06191g), 2011-01-01

# Organocatalytic Asymmetric Michael-type Reaction Between $\beta$ , $\gamma$ -Unsaturated $\alpha$ -Keto Ester and $\alpha$ -Nitro Ketone

Pengfei Li,<sup>a,b</sup> Sau Hing Chan,<sup>b</sup> Albert S C Chan<sup>\*a</sup> and Fuk Yee Kwong<sup>\*b</sup>

<sup>a</sup> Department of Chemistry, Faculty of Science, Hong Kong Baptist University, Hong Kong, China

<sup>b</sup> State Key Laboratory of Chirosciences and Department of Applied Biology and Chemical Technology, The Hong Kong polytechnic University, Hong Kong, China

Email Address: [ascchan@hkbu.edu.hk](mailto:ascchan@hkbu.edu.hk); [bcfyk@inet.polyu.edu.hk](mailto:bcfyk@inet.polyu.edu.hk)

## Supporting Information

### Contents

|                                                                                      |     |
|--------------------------------------------------------------------------------------|-----|
| A: General Information and Starting Materials                                        | S2  |
| B: General Procedure for Michael-type Reaction                                       | S2  |
| C: Optimazation of Michael-type Reaction                                             | S2  |
| D: Characterization Data of Michael-type Products                                    | S4  |
| E: Copies of CSP-HPLC Analysis of Michael-type Products                              | S11 |
| F: Copies of <sup>1</sup> H and <sup>13</sup> C NMR Spectra of Michael-type Products | S21 |

## A: General Information and Starting Materials

**General.** The  $^1\text{H-NMR}$  and  $^{13}\text{C-NMR}$  were recorded on a Bruke Ultrashield  $\text{TM}$  400 Plus (400 MHz) instrument. (s = singlet, d = doublet, dd = double doublet, t = triplet, q = quartet, m = multiplet). Chromatography was carried out with silica gel (200-300 mesh) using mixtures of hexane and ethyl acetate as eluent. High resolution mass spectrometry was carried out using Electrospray Ionization-Quadrupole-Time of Flight (ESI-Q-TOF) mass spectrometer. Optical rotations were measured on perkin elmer polarimeter 341; concentrations (c) are reported in g per 100 mL. Enantiomeric excess was determined by chiral HPLC using Agilent 1100 Series with Chiralpak OD-H (0.46cm x 25 cm), Chiralpak AD-H (0.46cm x 25 cm), Chiralpak AS-H (0.46cm x 25 cm).

**Materials.** All solvent and inorganic reagents were of p.a. quality and used without purification. All the  $\beta$ ,  $\gamma$ -unsaturated- $\alpha$ -keto esters were prepared following the literature procedures.<sup>(1)</sup> Unless otherwise noted, materials were obtained from commercial sources and used without purification.

## B: General Procedure for Michael-type Reaction

Unless noted, the reaction was carried out as following: to a solution of  $\text{Et}_2\text{O}$  (0.5 mL) was added  $\beta$ ,  $\gamma$ -unsaturated- $\alpha$ -keto ester **1** (0.13 mmol),  $\alpha$ -nitro ketone **2** (0.1 mmol) and **IIIb** (15 mol %). The reaction mixture was stirred at given temperature for the time indicated and then the solvent was removed under vacuum. The residue was purified by column chromatography on silica gel to yield the desired products **3**.

## C: Optimization of Michael-type Reaction

Table 1 The screening of solvent

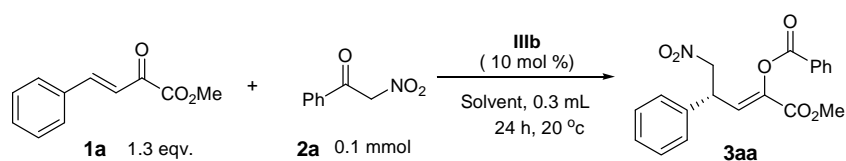

| Entry | solvent                  | yield % | ee % | Entry | solvent                       | yield % | ee % |
|-------|--------------------------|---------|------|-------|-------------------------------|---------|------|
| 1     | $\text{CH}_2\text{Cl}_2$ | 69      | 77   | 11    | t-BuOMe                       | 44      | 93   |
| 2     | $\text{CHCl}_3$          | 69      | 74   | 12    | DMSO                          | 45      | 40   |
| 3     | THF                      | 71      | 82   | 13    | EtOH                          | 26      | 69   |
| 4     | EtOAc                    | 70      | 79   | 14    | Xylenes                       | 61      | 80   |
| 5     | Toluene                  | 62      | 85   | 15    | Petroleum ether<br>(30-60 °C) | 47      | 80   |
| 6     | $\text{Et}_2\text{O}$    | 48      | 93   | 16    | PhOMe                         | 58      | 82   |
| 7     | MeCN                     | 78      | 62   | 17    | PhOPh                         | 76      | 84   |
| 8     | MeOH                     | 42      | 40   | 18    | (n-Bu) $_2$ O                 | 55      | 86   |
| 9     | 1,4-dioxane              | 79      | 80   | 19    | hexane                        | 53      | 80   |
| 10    | DMF                      | 44      | 8    |       |                               |         |      |

(1) Wu, Y.-C.; Liu, L.; Li, H.-J.; Wang, D.; Chen, Y.-J. *J. Org. Chem.* **2006**, *71*, 6592.

Table 2 The screening of temperature and mixture solvents

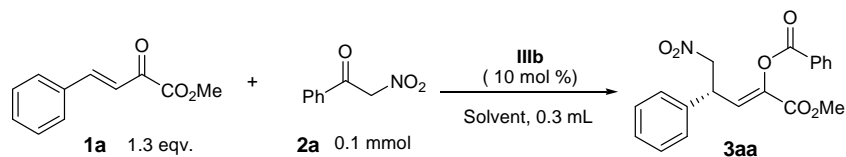

| Entry | solvent           | Tempt. | Time | yield | ee % | Entry | solvent                      | Tempt. | Time | yield | ee % |
|-------|-------------------|--------|------|-------|------|-------|------------------------------|--------|------|-------|------|
| 1     |                   | -10 °C | 36 h | 26    | 92   | 13    | Et <sub>2</sub> O 0.5 mL;    | 20 °C  | 24 h | 48    | 94   |
| 2     | THF               | 10 °C  | 24 h | 66    | 82   | 14    | IIIb (15 mol%)               | 5 °C   | 24 h | 49    | 91   |
| 3     |                   | 20 °C  | 24 h | 71    | 82   | 15    | Et <sub>2</sub> O 0.3 mL;    | 5 °C   | 24 h | 51    | 83   |
| 4     |                   | -10 °C | 36 h | 31    | 88   | 16    | THF 0.1 mL;                  | 10 °C  | 24 h | 40    | 92   |
| 5     | Toluene           | 10 °C  | 24 h | 61    | 84   | 17    | IIIb (15 mol%)               | 20 °C  | 66 h | 48    | 93   |
| 6     |                   | 20 °C  | 24 h | 62    | 85   | 18    | Et <sub>2</sub> O 0.3 mL;    | 0 °C   | 36 h | 52    | 92   |
| 7     | t-BuOMe           | 20 °C  | 24 h | 44    | 93   | 19    | THF 0.2 mL;                  | 5 °C   | 24 h | 50    | 88   |
| 8     |                   | 30 °C  | 24 h | 42    | 90   | 20    | IIIb (15 mol%)               | 10 °C  | 36 h | 52    | 74   |
| 9     |                   | -10 °C | 36 h | 29    | 88   | 21    |                              | 20 °C  | 66 h | 56    | 89   |
| 10    | Et <sub>2</sub> O | 20 °C  | 24 h | 48    | 95   | 22    | t-BuOMe 0.3 mL<br>THF 0.1 mL | 20 °C  | 66 h | 41    | 93   |
| 11    |                   | 30 °C  | 24 h | 88    | 81   | 23    | t-BuOMe 0.3 mL<br>THF 0.2 mL | 20 °C  | 66 h | 45    | 90   |

Table 3 The screening of substrate ratio

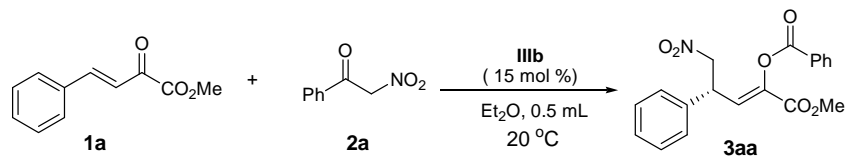

| Entry | 1a  | 2a  | Time | yield | ee % | Entry           | 1a  | 2a  | Time   | yield | ee % |
|-------|-----|-----|------|-------|------|-----------------|-----|-----|--------|-------|------|
| 1     | 1.5 | 1.0 | 24 h | 54    | 94   | 8               | 1.3 | 1.0 | 6 h    | 59    | 89   |
| 2     | 2.0 | 1.0 | 24 h | 52    | 94   | 9               | 1.3 | 1.0 | 12 h   | 56    | 92   |
| 3     | 1.0 | 1.3 | 24 h | 61    | 78   | 10              | 1.3 | 1.0 | 18 h   | 56    | 92   |
| 4     | 1.0 | 1.5 | 24 h | 61    | 78   | 11 <sup>a</sup> | 1.3 | 1.0 | 12 h   | 41    | 68   |
| 5     | 1.0 | 2.0 | 24 h | 53    | 81   | 12 <sup>b</sup> | 1.3 | 1.0 | 12 h   | 43    | 82   |
| 6     | 1.0 | 1.0 | 24 h | 42    | 84   | 13 <sup>c</sup> | 1.3 | 1.0 | 17.5 h | 61    | 90   |
| 7     | 1.2 | 1.0 | 24 h | 44    | 88   | 14 <sup>d</sup> | 1.3 | 1.0 | 17.5 h | 60    | 86   |

<sup>a</sup> PhCO<sub>2</sub>Li (15 mol %) was added. <sup>b</sup> PhCO<sub>2</sub>H (15 mol %) was added. <sup>c</sup> II was added in 3 portions. <sup>d</sup> II was added in 5 portions.

## D: Characterization Data of Michael-type Products

### (R,Z)-1-(methoxycarbonyl)-4-nitro-3-phenylbut-1-enyl benzoate (3aa)

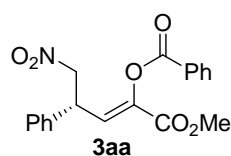

The product was obtained in 56% yield. <sup>1</sup>H-NMR (400 MHz, CDCl<sub>3</sub>): δ (ppm) 8.13-8.10 (m, 2H), 7.69-7.64 (m, 1H), 7.54-7.50 (m, 2H), 7.36-7.29 (m, 3H), 7.24-7.21 (m, 2H), 6.78 (d, *J* = 9.6 Hz, 1H), 4.73 (d, *J* = 7.6 Hz, 2H), 4.62-4.56 (m, 1H), 3.78 (s, 3H). <sup>13</sup>C-NMR (100 MHz, CDCl<sub>3</sub>): δ (ppm) 164.3, 161.8, 140.3, 136.6, 134.3, 130.6, 129.5, 128.9, 128.5, 128.2, 127.8, 127.6, 78.6, 52.9, 41.3 [ $\alpha$ ]<sub>D</sub><sup>20</sup> = -113.8 (c = 1.06 in CHCl<sub>3</sub>, 94% ee). IR  $\nu$  max: 3062, 3024, 2955, 1732, 1555, 1258, 1086, 707 cm<sup>-1</sup>. HRMS: exact mass calculated for [M+Na]<sup>+</sup> (C<sub>19</sub>H<sub>17</sub>NO<sub>6</sub>Na) requires *m/z* 378.0954, found *m/z* 378.0971. The enantiomeric excess was determined by HPLC. [AD-H, 230 nm, hexane : IPA = 85 : 15, 1.0 mL/min]: 14.337 min (minor), 16.904 min (major).

### (R,Z)-1-(ethoxycarbonyl)-4-nitro-3-phenylbut-1-enyl benzoate (3ba)

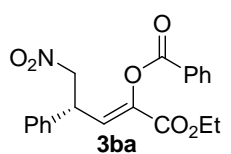

The product was obtained in 50% yield. <sup>1</sup>H-NMR (400 MHz, CDCl<sub>3</sub>): δ (ppm) 8.13-8.11 (m, 2H), 7.66 (t, *J* = 7.4 Hz, 1H), 7.52 (t, *J* = 7.8 Hz, 2H), 7.36-7.29 (m, 3H), 7.25-7.23 (m, 2H), 6.76 (d, *J* = 9.6 Hz, 1H), 4.74 (d, *J* = 7.6 Hz, 2H), 4.60 (dd, *J* = 8.0, 16.8 Hz, 1H), 4.24 (q, *J* = 7.1 Hz, 2H), 1.26 (t, *J* = 7.0 Hz, 3H). <sup>13</sup>C-NMR (100 MHz, CDCl<sub>3</sub>): δ (ppm) 164.3, 161.3, 140.5, 136.7, 134.2, 130.5, 129.5, 128.8, 128.4, 128.3, 127.6, 127.3, 78.6, 62.2, 41.3, 14.2. [ $\alpha$ ]<sub>D</sub><sup>20</sup> = -85.6 (c = 1.32 in CHCl<sub>3</sub>, 84% ee). IR  $\nu$  max: 2981, 1727, 1553, 1257, 1085, 705 cm<sup>-1</sup>. HRMS: exact mass calculated for [M+Na]<sup>+</sup> (C<sub>20</sub>H<sub>19</sub>NO<sub>6</sub>Na) requires *m/z* 392.1110, found *m/z* 392.1127. The enantiomeric excess was determined by HPLC. [AD-H, 230 nm, hexane : IPA = 90 : 10, 1.0 mL/min]: 22.261 min (minor), 23.594 min (major).

### (R,Z)-1-(isopropoxycarbonyl)-4-nitro-3-phenylbut-1-enyl benzoate (3ca)

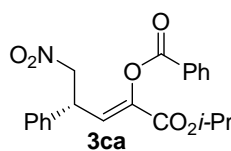

The product was obtained in 61% yield. <sup>1</sup>H-NMR (400 MHz, CDCl<sub>3</sub>): δ (ppm) 8.13-8.10 (m, 2H), 7.66 (t, *J* = 7.6 Hz, 1H), 7.52 (t, *J* = 7.8 Hz, 2H), 7.36-7.29 (m, 3H), 7.25-7.23 (m, 2H), 6.72 (d, *J* = 9.2 Hz, 1H), 5.13-5.05 (m, 1H), 4.74 (d, *J* = 8.0 Hz, 2H), 4.63-4.57 (m, 1H), 1.25-1.23 (m, 6H). <sup>13</sup>C-NMR (100 MHz, CDCl<sub>3</sub>): δ (ppm) 164.4, 160.9, 140.9, 136.8, 134.2, 130.5, 129.5, 128.8, 128.4, 127.6, 126.9, 78.6, 70.2, 41.3, 21.8. [ $\alpha$ ]<sub>D</sub><sup>20</sup> = -59.8 (c = 1.67 in CHCl<sub>3</sub>, 72% ee). IR  $\nu$  max: 3066, 3031, 2983, 2927, 1726, 1556, 1259, 1087, 706 cm<sup>-1</sup>. HRMS: exact mass calculated for [M+Na]<sup>+</sup> (C<sub>21</sub>H<sub>21</sub>NO<sub>6</sub>Na) requires *m/z* 406.1267, found *m/z* 406.1277. The enantiomeric excess was determined by HPLC. [AD-H, 230 nm, hexane : IPA = 85 : 15, 1.0 mL/min]: 13.466 min (major), 21.662 min (minor).

### (R,Z)-1-(ethoxycarbonyl)-3-(2-chlorophenyl)-4-nitrobut-1-enyl benzoate (3da)

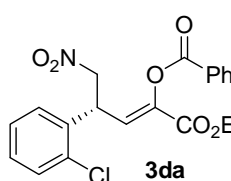

The product was obtained in 50% yield. <sup>1</sup>H-NMR (400 MHz, CDCl<sub>3</sub>): δ (ppm) 8.06 (d, *J* = 8.0 Hz, 2H), 7.64 (t, *J* = 7.0 Hz, 1H), 7.48 (t, *J* = 7.4 Hz, 2H), 7.34 (d, *J* = 6.8 Hz, 1H), 7.27-7.19 (m, 3H), 6.83 (d, *J* = 8.8 Hz, 1H), 5.14-5.09 (m, 1H), 4.78-4.75 (m, 2H), 4.25 (q, *J* = 6.9 Hz, 2H), 1.27 (t, *J* = 6.8 Hz, 3H). <sup>13</sup>C-NMR (100 MHz, CDCl<sub>3</sub>): δ (ppm) 164.1, 161.3, 141.2, 134.4, 134.1, 133.7, 130.6, 130.5, 129.6, 129.1, 128.7, 128.3, 127.8, 126.1, 77.2, 62.2, 38.3, 14.2. IR  $\nu$  max: 3066, 2984, 2914, 1730, 1556, 1258, 1086, 708 cm<sup>-1</sup>. HRMS: exact mass calculated for [M+Na]<sup>+</sup> (C<sub>20</sub>H<sub>18</sub>ClNO<sub>6</sub>Na) requires *m/z* 426.0720, found *m/z* 426.0722. The enantiomeric excess was determined by HPLC. [AD-H, 230 nm, hexane : IPA = 85 : 15, 1.0 mL/min]: 16.135 min (major), 21.987 min (minor).

**(R,Z)-1-(ethoxycarbonyl)-3-(2-bromophenyl)-4-nitrobut-1-enyl benzoate (3ea)**

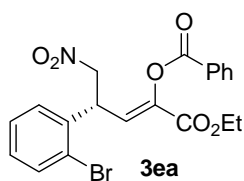

The product was obtained in 71% yield.  $^1\text{H-NMR}$  (400 MHz,  $\text{CDCl}_3$ ):  $\delta$  (ppm) 8.06 (d,  $J = 8.0$  Hz, 2H), 7.63 (t,  $J = 7.4$  Hz, 1H), 7.53-7.46 (m, 3H), 7.29-7.28 (m, 2H), 7.14-7.10 (m, 1H), 6.82 (d,  $J = 8.8$  Hz, 1H), 5.15 (dd,  $J = 8.2, 5.0$ , 1H), 4.78-4.67 (m, 2H), 4.25 (q,  $J = 7.1$  Hz, 2H), 1.27 (t,  $J = 7.0$  Hz, 3H).  $^{13}\text{C-NMR}$  (100 MHz,  $\text{CDCl}_3$ ):  $\delta$  (ppm) 164.1, 161.3, 141.2, 136.1, 134.1, 133.9, 130.5, 129.8, 129.0, 128.7, 128.4, 128.2, 126.2, 124.2, 77.4, 62.2, 40.5, 14.2. IR  $\nu$  max: 3066, 2983, 2917, 1729, 1556, 1257, 1085, 707  $\text{cm}^{-1}$ .

HRMS: exact mass calculated for  $[\text{M}+\text{Na}]^+$  ( $\text{C}_{20}\text{H}_{18}\text{BrNO}_6\text{Na}$ ) requires  $m/z$  470.0215, found  $m/z$  470.0219. The enantiomeric excess was determined by HPLC. [AD-H, 230 nm, hexane : IPA = 85 : 15, 1.0 mL/min]: 17.776 min (major), 24.726 min (minor).

**(R,Z)-1-(ethoxycarbonyl)-3-(3-chlorophenyl)-4-nitrobut-1-enyl benzoate (3fa)**

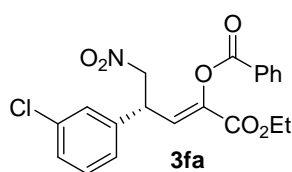

The product was obtained in 62% yield.  $^1\text{H-NMR}$  (400 MHz,  $\text{CDCl}_3$ ):  $\delta$  (ppm) 8.11 (d,  $J = 8.0$  Hz, 2H), 7.67 (t,  $J = 7.4$  Hz, 1H), 7.52 (t,  $J = 7.6$  Hz, 2H), 7.27-7.23 (m, 3H), 7.14-7.11 (m, 1H), 6.71 (d,  $J = 9.2$  Hz, 1H), 4.72 (d,  $J = 8.0$  Hz, 2H), 4.57 (dd,  $J = 7.8, 16.6$  Hz, 1H), 4.25 (q,  $J = 7.1$  Hz, 2H), 1.27 (t,  $J = 7.2$  Hz, 3H).  $^{13}\text{C-NMR}$  (100 MHz,  $\text{CDCl}_3$ ):  $\delta$  (ppm) 164.3, 161.2, 141.0, 138.7, 135.3, 134.3, 130.7, 130.5, 128.9, 128.7, 128.1, 127.9, 126.4, 125.8, 78.2, 62.3, 40.9, 14.2.  $[\alpha]_D^{20} = -51.6$  ( $c = 1.65$  in  $\text{CHCl}_3$ , 84% ee). IR  $\nu$  max: 3063, 2983, 2917, 1729, 1556, 1257, 1085, 708  $\text{cm}^{-1}$ . HRMS: exact mass calculated for  $[\text{M}+\text{Na}]^+$  ( $\text{C}_{20}\text{H}_{18}\text{ClNO}_6\text{Na}$ ) requires  $m/z$  426.0720, found  $m/z$  426.0736. The enantiomeric excess was determined by HPLC. [AD-H, 230 nm, hexane : IPA = 85 : 15, 1.0 mL/min]: 11.985 min (minor), 13.443 min (major).

**(R,Z)-1-(ethoxycarbonyl)-3-(3-bromophenyl)-4-nitrobut-1-enyl benzoate (3ga)**

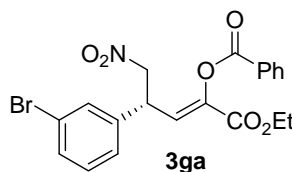

The product was obtained in 58% yield.  $^1\text{H-NMR}$  (400 MHz,  $\text{CDCl}_3$ ):  $\delta$  (ppm) 8.10 (d,  $J = 8.0$  Hz, 2H), 7.67 (t,  $J = 6.8$  Hz, 1H), 7.52 (t,  $J = 7.2$  Hz, 2H), 7.41 (t,  $J = 7.8$  Hz, 2H), 7.21-7.16 (m, 2H), 6.71 (d,  $J = 9.6$  Hz, 1H), 4.72 (d,  $J = 7.6$  Hz, 2H), 4.56 (dd,  $J = 8.2, 16.2$  Hz, 1H), 4.25 (q,  $J = 6.8$  Hz, 2H), 1.27 (t,  $J = 7.2$  Hz, 3H).  $^{13}\text{C-NMR}$  (100 MHz,  $\text{CDCl}_3$ ):  $\delta$  (ppm) 164.2, 161.2, 141.0, 139.0, 134.3, 131.6, 131.0, 130.8, 130.5, 128.9, 128.1, 126.4, 126.3, 123.4, 78.2, 62.3, 40.8, 14.2.  $[\alpha]_D^{20} = -77.5$  ( $c = 1.86$  in  $\text{CHCl}_3$ , 91% ee). IR  $\nu$  max: 3060, 2982, 2911, 1729, 1556, 1258, 1094, 708  $\text{cm}^{-1}$ . HRMS: exact mass calculated for  $[\text{M}+\text{Na}]^+$  ( $\text{C}_{20}\text{H}_{18}\text{BrNO}_6\text{Na}$ ) requires  $m/z$  470.0215, found  $m/z$  470.0229. The enantiomeric excess was determined by HPLC. [AD-H, 230 nm, hexane : IPA = 85 : 15, 1.0 mL/min]: 12.063 min (minor), 13.926 min (major).

**(R,Z)-1-(methoxycarbonyl)-4-nitro-3-(3-nitrophenyl)but-1-enyl benzoate (3ha)**

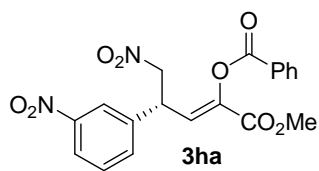

The product was obtained in 56% yield.  $^1\text{H-NMR}$  (400 MHz,  $\text{CDCl}_3$ ):  $\delta$  (ppm) 8.14 (d,  $J = 7.2$  Hz, 2H), 8.08 (d,  $J = 8.0$  Hz, 2H), 7.67 (t,  $J = 7.4$  Hz, 1H), 7.58 (d,  $J = 7.6$  Hz, 1H), 7.54-7.50 (m, 3H), 6.78 (d,  $J = 9.2$  Hz, 1H), 4.80 (d,  $J = 8.0$  Hz, 2H), 4.70 (dd,  $J = 8.2, 15.8$  Hz, 1H), 3.79 (s, 3H).  $^{13}\text{C-NMR}$  (100 MHz,  $\text{CDCl}_3$ ):  $\delta$  (ppm) 164.1, 161.5, 148.9, 141.1, 138.8, 134.5, 133.9, 130.5, 128.9, 127.8, 126.1, 123.5, 122.7, 77.8, 53.1, 40.7.  $[\alpha]_D^{20} = -66.8$  ( $c = 1.66$  in  $\text{CHCl}_3$ , 86% ee). IR  $\nu$  max: 3066, 2956, 2914, 1732, 1556, 1531, 1281, 1258, 1087, 708  $\text{cm}^{-1}$ . HRMS: exact mass calculated for  $[\text{M}+\text{Na}]^+$  ( $\text{C}_{19}\text{H}_{16}\text{N}_2\text{O}_8\text{Na}$ ) requires  $m/z$  423.0804, found  $m/z$  423.0819. The enantiomeric excess was determined by HPLC. [AD-H, 230 nm, hexane : IPA = 85 : 15, 1.0 mL/min]: 24.179 min (minor), 29.218 min (major).

**(R,Z)-1-(ethoxycarbonyl)-4-nitro-3-(3-nitrophenyl)but-1-enyl benzoate (3ia)**

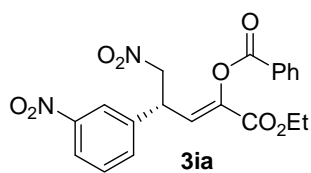

The product was obtained in 49% yield.  $^1\text{H-NMR}$  (400 MHz,  $\text{CDCl}_3$ ):  $\delta$  (ppm) 8.15-8.13 (m, 2H), 8.09-8.07 (m, 2H), 7.67 (t,  $J = 7.5$  Hz, 1H), 7.59 (d,  $J = 8.0$  Hz, 1H), 7.54-7.50 (m, 3H), 6.75 (d,  $J = 9.0$  Hz, 1H), 4.80 (d,  $J = 8.0$  Hz, 2H), 4.71 (dd,  $J = 7.5, 16.5$  Hz, 1H), 4.24 (qd,  $J = 1.1, 7.2$  Hz, 2H), 1.27 (t,  $J = 7.8$  Hz, 3H).  $^{13}\text{C-NMR}$  (100 MHz,  $\text{CDCl}_3$ ):  $\delta$  (ppm) 164.2, 161.0, 148.7, 141.5, 138.9, 134.5, 133.9, 130.5, 128.9, 127.8, 125.6, 123.5, 122.7, 77.8, 62.4, 40.7, 14.1.  $[\alpha]_{\text{D}}^{20} = -76.7$  ( $c = 1.28$  in  $\text{CHCl}_3$ , 90% ee). IR  $\nu$  max: 3075, 2986, 2914, 1729, 1556, 1531, 1352, 1258, 1088, 708  $\text{cm}^{-1}$ . HRMS: exact mass calculated for  $[\text{M}+\text{Na}]^+$  ( $\text{C}_{20}\text{H}_{18}\text{N}_2\text{O}_8\text{Na}$ ) requires  $m/z$  437.0961, found  $m/z$  437.0963. The enantiomeric excess was determined by HPLC. [AD-H, 230 nm, hexane : IPA = 85 : 15, 1.0 mL/min]: 22.833 min (minor), 28.893 min (major).

**(R,Z)-1-(ethoxycarbonyl)-4-nitro-3-m-tolylbut-1-enyl benzoate (3ja)**

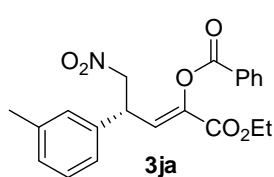

The product was obtained in 50% yield.  $^1\text{H-NMR}$  (400 MHz,  $\text{CDCl}_3$ ):  $\delta$  (ppm) 8.12 (d,  $J = 7.5$  Hz, 2H), 7.66 (t,  $J = 7.5$  Hz, 1H), 7.52 (t,  $J = 7.8$  Hz, 2H), 7.22 (t,  $J = 8.0$  Hz, 1H), 7.09 (d,  $J = 7.5$  Hz, 1H), 7.03 (d,  $J = 6.5$  Hz, 2H), 6.75 (d,  $J = 9.5$  Hz, 1H), 4.73 (d,  $J = 8.0$  Hz, 2H), 4.56 (dd,  $J = 7.8, 17.3$  Hz, 1H), 4.24 (q,  $J = 7.2$  Hz, 2H), 2.30 (s, 3H), 1.27 (t,  $J = 7.0$  Hz, 3H).  $^{13}\text{C-NMR}$  (100 MHz,  $\text{CDCl}_3$ ):  $\delta$  (ppm) 164.3, 161.4, 140.5, 139.3, 136.6, 134.2, 130.5, 129.4, 129.2, 128.8, 128.4, 127.5, 124.5, 78.6, 62.1, 41.3, 21.5, 14.2.  $[\alpha]_{\text{D}}^{20} = -79.0$  ( $c = 1.34$  in  $\text{CHCl}_3$ , 82% ee). IR  $\nu$  max: 3063, 2982, 2911, 1729, 1555, 1259, 1093, 705  $\text{cm}^{-1}$ . HRMS: exact mass calculated for  $[\text{M}+\text{Na}]^+$  ( $\text{C}_{21}\text{H}_{21}\text{NO}_6\text{Na}$ ) requires  $m/z$  406.1267, found  $m/z$  406.1286. The enantiomeric excess was determined by HPLC. [AD-H, 230 nm, hexane : IPA = 85 : 15, 1.0 mL/min]: 10.135 min (minor), 11.03 min (major).

**(R,Z)-1-(ethoxycarbonyl)-3-(3-methoxyphenyl)-4-nitrobut-1-enyl benzoate (3ka)**

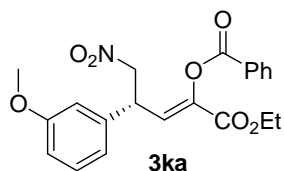

The product was obtained in 47% yield.  $^1\text{H-NMR}$  (400 MHz,  $\text{CDCl}_3$ ):  $\delta$  (ppm) 8.15 (d,  $J = 8.0$  Hz, 2H), 7.67 (t,  $J = 8.2$  Hz, 1H), 7.54 (t,  $J = 7.6$  Hz, 2H), 7.30-7.28 (m, 1H), 6.84 (d,  $J = 7.2$  Hz, 2H), 6.77 (d,  $J = 14.4$  Hz, 2H), 4.75 (d,  $J = 8.0$  Hz, 2H), 4.63-4.57 (m, 1H), 4.27 (q,  $J = 7.1$  Hz, 2H), 3.78 (s, 3H), 1.29 (t,  $J = 7.2$  Hz, 3H).  $^{13}\text{C-NMR}$  (100 MHz,  $\text{CDCl}_3$ ):  $\delta$  (ppm) 164.3, 161.3, 160.3, 140.6, 138.1, 134.2, 130.5, 128.8, 128.3, 127.2, 119.6, 113.7, 113.6, 78.5, 62.1, 55.4, 41.2, 14.2.  $[\alpha]_{\text{D}}^{20} = -89.8$  ( $c = 1.34$  in  $\text{CHCl}_3$ , 86% ee). IR  $\nu$  max: 3060, 2981, 2933, 2838, 1729, 1601, 1555, 1260, 1090, 707  $\text{cm}^{-1}$ . HRMS: exact mass calculated for  $[\text{M}+\text{Na}]^+$  ( $\text{C}_{21}\text{H}_{21}\text{NO}_7\text{Na}$ ) requires  $m/z$  422.1216, found  $m/z$  422.1220. The enantiomeric excess was determined by HPLC. [AD-H, 230 nm, hexane : IPA = 85 : 15, 1.0 mL/min]: 14.702 min (minor), 17.455 min (major).

**(R,Z)-1-(ethoxycarbonyl)-3-(4-fluorophenyl)-4-nitrobut-1-enyl benzoate (3la)**

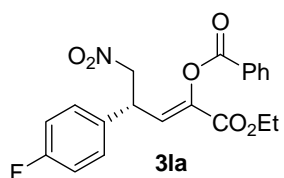

The product was obtained in 56% yield.  $^1\text{H-NMR}$  (400 MHz,  $\text{CDCl}_3$ ):  $\delta$  (ppm) 8.10 (d,  $J = 7.6$  Hz, 2H), 7.67 (t,  $J = 7.4$  Hz, 1H), 7.52 (t,  $J = 7.8$  Hz, 2H), 7.23-7.19 (m, 2H), 7.02 (t,  $J = 8.6$  Hz, 2H), 6.72 (d,  $J = 9.6$  Hz, 1H), 4.71 (d,  $J = 8.0$  Hz, 2H), 4.58 (dd,  $J = 8.2, 16.2$  Hz, 1H), 4.25 (q,  $J = 7.2$  Hz, 2H), 1.26 (t,  $J = 7.0$  Hz, 3H).  $^{13}\text{C-NMR}$  (100 MHz,  $\text{CDCl}_3$ ):  $\delta$  (ppm) 164.3, 161.3, 140.7, 134.3, 132.5 (d,  $J_{\text{C-F}} = 3.4$  Hz), 130.5, 129.3 (d,  $J_{\text{C-F}} = 8.4$  Hz), 128.9, 128.2, 127.0, 116.5 (d,  $J_{\text{C-F}} = 21.7$  Hz), 78.5, 62.2, 40.6, 14.2.  $[\alpha]_{\text{D}}^{20} = -73.4$  ( $c = 1.55$  in  $\text{CHCl}_3$ , 88% ee). IR  $\nu$  max: 3066, 2983, 2911, 1728, 1556, 1258, 1098, 707  $\text{cm}^{-1}$ . HRMS: exact mass calculated for  $[\text{M}+\text{Na}]^+$  ( $\text{C}_{20}\text{H}_{18}\text{FNO}_6\text{Na}$ ) requires  $m/z$  410.1016, found  $m/z$  410.1007. The enantiomeric excess was determined by HPLC. [AD-H, 230 nm, hexane : IPA = 85 : 15, 1.0 mL/min]: 18.542 min (major), 21.56 min (minor).

**(R,Z)-1-(ethoxycarbonyl)-3-(4-chlorophenyl)-4-nitrobut-1-enyl benzoate (3ma)**

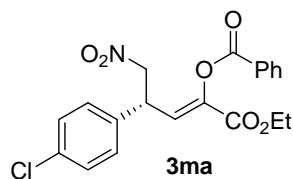

The product was obtained in 47% yield.  $^1\text{H-NMR}$  (400 MHz,  $\text{CDCl}_3$ ):  $\delta$  (ppm) 8.09 (d,  $J = 7.2$  Hz, 2H), 7.66 (t,  $J = 7.4$  Hz, 1H), 7.52 (t,  $J = 7.6$  Hz, 2H), 7.31 (d,  $J = 8.4$  Hz, 2H), 7.17 (d,  $J = 8.4$  Hz, 2H), 6.70 (d,  $J = 9.6$  Hz, 1H), 4.71 (d,  $J = 8.0$  Hz, 2H), 4.57 (dd,  $J = 8.0, 16.8$  Hz, 1H), 4.25 (q,  $J = 7.1$  Hz, 2H), 1.27 (t,  $J = 7.0$  Hz, 3H).  $^{13}\text{C-NMR}$  (100 MHz,  $\text{CDCl}_3$ ):  $\delta$  (ppm) 164.3, 161.2, 140.9, 135.2, 134.4, 134.3, 130.5, 129.7, 129.0, 128.9, 128.1, 126.6, 78.3, 62.3, 40.7, 14.2.  $[\alpha]_{\text{D}}^{20} = -95.3$  ( $c = 0.97$  in  $\text{CHCl}_3$ , 87% ee). IR  $\nu$  max: 3069, 2987, 2921, 2851, 1729, 1556, 1258, 1094, 707  $\text{cm}^{-1}$ . HRMS: exact mass calculated for  $[\text{M}+\text{Na}]^+$  ( $\text{C}_{20}\text{H}_{18}\text{ClNO}_6\text{Na}$ ) requires  $m/z$  426.0720, found  $m/z$  426.0737. The enantiomeric excess was determined by HPLC. [OD-H, 230 nm, hexane : IPA = 85 : 15, 1.0 mL/min]: 24.455 min (major), 31.277 min (minor).

**(R,Z)-1-(ethoxycarbonyl)-3-(4-bromophenyl)-4-nitrobut-1-enyl benzoate (3na)**

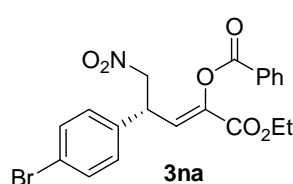

The product was obtained in 70% yield.  $^1\text{H-NMR}$  (400 MHz,  $\text{CDCl}_3$ ):  $\delta$  (ppm) 8.09 (d,  $J = 7.0$  Hz, 2H), 7.66 (t,  $J = 7.3$  Hz, 1H), 7.52 (t,  $J = 7.8$  Hz, 2H), 7.45 (d,  $J = 8.5$  Hz, 2H), 7.11 (d,  $J = 8.5$  Hz, 2H), 6.70 (d,  $J = 9.5$  Hz, 1H), 4.71 (d,  $J = 8.5$  Hz, 2H), 4.55 (dd,  $J = 7.5, 17.0$  Hz, 1H), 4.24 (q,  $J = 7.2$  Hz, 2H), 1.26 (t,  $J = 7.3$  Hz, 3H).  $^{13}\text{C-NMR}$  (100 MHz,  $\text{CDCl}_3$ ):  $\delta$  (ppm) 164.3, 161.2, 140.8, 135.7, 134.3, 132.6, 130.5, 129.3, 128.9, 128.1, 126.6, 122.5, 78.2, 62.2, 40.7, 14.2.  $[\alpha]_{\text{D}}^{20} = -67.5$  ( $c = 2.61$  in  $\text{CHCl}_3$ , 92% ee). IR  $\nu$  max: 3066, 2982, 2930, 1729, 1556, 1259, 1104, 708  $\text{cm}^{-1}$ . HRMS: exact mass calculated for  $[\text{M}+\text{Na}]^+$  ( $\text{C}_{20}\text{H}_{18}\text{BrNO}_6\text{Na}$ ) requires  $m/z$  470.0215, found  $m/z$  470.0233. The enantiomeric excess was determined by HPLC. [OD-H, 230 nm, hexane : IPA = 85 : 15, 1.0 mL/min]: 27.869 min (major), 43.752 min (minor).

**(R,Z)-1-(ethoxycarbonyl)-4-nitro-3-(4-nitrophenyl)but-1-enyl benzoate (3oa)**

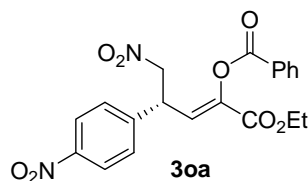

The product was obtained in 58% yield.  $^1\text{H-NMR}$  (400 MHz,  $\text{CDCl}_3$ ):  $\delta$  (ppm) 8.19 (d,  $J = 9.0$  Hz, 2H), 8.07 (d,  $J = 9.5$  Hz, 2H), 7.68 (t,  $J = 7.5$  Hz, 1H), 7.52 (t,  $J = 8.0$  Hz, 2H), 7.43 (d,  $J = 9.0$  Hz, 2H), 6.72 (d,  $J = 9.5$  Hz, 1H), 4.80-4.78 (m, 2H), 4.70 (dd,  $J = 7.5, 16.0$  Hz, 1H), 4.26 (q,  $J = 7.0$  Hz, 2H), 1.27 (t,  $J = 7.3$  Hz, 3H).  $^{13}\text{C-NMR}$  (100 MHz,  $\text{CDCl}_3$ ):  $\delta$  (ppm) 164.2, 161.0, 147.9, 143.9, 141.6, 134.5, 130.5, 129.0, 128.7, 127.9, 125.4, 124.7, 77.8, 62.5, 40.9, 14.2.  $[\alpha]_{\text{D}}^{20} = -76.3$  ( $c = 1.13$  in  $\text{CHCl}_3$ , 84% ee). IR  $\nu$  max: 3113, 3079, 2984, 2923, 1731, 1557, 1523, 1349, 1259, 1109, 709  $\text{cm}^{-1}$ . HRMS: exact mass calculated for  $[\text{M}+\text{Na}]^+$  ( $\text{C}_{20}\text{H}_{18}\text{N}_2\text{O}_8\text{Na}$ ) requires  $m/z$  437.0961, found  $m/z$  437.0975. The enantiomeric excess was determined by HPLC. [AD-H, 230 nm, hexane : IPA = 85 : 15, 1.0 mL/min]: 39.567 min (major), 49.294 min (minor).

**(R,Z)-1-(ethoxycarbonyl)-4-nitro-3-p-tolylbut-1-enyl benzoate (3pa)**

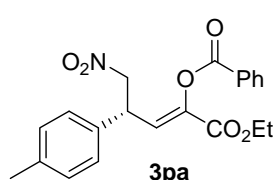

The product was obtained in 56% yield.  $^1\text{H-NMR}$  (400 MHz,  $\text{CDCl}_3$ ):  $\delta$  (ppm) 8.12 (d,  $J = 7.2$  Hz, 2H), 7.66 (t,  $J = 7.4$  Hz, 1H), 7.52 (t,  $J = 7.8$  Hz, 2H), 7.15-7.10 (m, 4H), 6.74 (d,  $J = 9.6$  Hz, 1H), 4.71 (d,  $J = 8.0$  Hz, 2H), 4.56 (dd,  $J = 7.6, 17.2$  Hz, 1H), 4.24 (q,  $J = 7.2$  Hz, 2H), 2.31 (s, 3H), 1.26 (t,  $J = 7.2$  Hz, 3H).  $^{13}\text{C-NMR}$  (100 MHz,  $\text{CDCl}_3$ ):  $\delta$  (ppm) 164.3, 161.4, 140.3, 138.2, 134.2, 133.6, 130.5, 130.1, 128.8, 128.3, 127.5, 127.4, 78.6, 62.1, 40.9, 21.2, 14.2.  $[\alpha]_{\text{D}}^{20} = -90.9$  ( $c = 1.53$  in  $\text{CHCl}_3$ , 82% ee). IR  $\nu$  max: 3059, 2982, 2914, 1728, 1555, 1258, 1109, 708  $\text{cm}^{-1}$ . HRMS: exact mass calculated for  $[\text{M}+\text{Na}]^+$  ( $\text{C}_{21}\text{H}_{21}\text{NO}_6\text{Na}$ ) requires  $m/z$  406.1267, found  $m/z$  406.1283. The enantiomeric excess was determined by HPLC. [AD-H, 230 nm, hexane : IPA = 85 : 15, 1.0 mL/min]: 13.374 min (minor), 15.741 min (major).

**(R,Z)-1-(ethoxycarbonyl)-3-(4-methoxyphenyl)-4-nitrobut-1-enyl benzoate (3qa)**

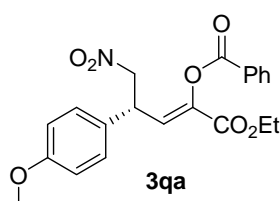

The product was obtained in 63% yield.  $^1\text{H-NMR}$  (400 MHz,  $\text{CDCl}_3$ ):  $\delta$  (ppm) 8.12 (d,  $J = 8.0$  Hz, 2H), 7.66 (t,  $J = 7.4$  Hz, 1H), 7.52 (t,  $J = 7.2$  Hz, 2H), 7.15 (d,  $J = 7.6$  Hz, 2H), 6.85 (d,  $J = 7.2$  Hz, 2H), 6.73 (d,  $J = 9.6$  Hz, 2H), 4.70 (d,  $J = 8.0$  Hz, 2H), 4.54 (dd,  $J = 7.8, 16.2$  Hz, 1H), 4.24 (q,  $J = 7.1$  Hz, 2H), 3.77 (s, 3H), 1.26 (t,  $J = 7.0$  Hz, 3H).  $^{13}\text{C-NMR}$  (100 MHz,  $\text{CDCl}_3$ ):  $\delta$  (ppm) 164.3, 161.4, 159.6, 140.3, 134.2, 130.5, 128.8, 128.7, 128.6, 128.4, 127.6, 114.9, 78.8, 62.1, 55.4, 40.6, 14.2.  $[\alpha]_{\text{D}}^{20} = -86.8$  ( $c = 1.27$  in  $\text{CHCl}_3$ , 73% ee). IR  $\nu$  max: 2983, 2933, 2835, 1729, 1555, 1514, 1253, 1108, 709  $\text{cm}^{-1}$ . HRMS: exact mass calculated for  $[\text{M}+\text{Na}]^+$  ( $\text{C}_{21}\text{H}_{21}\text{NO}_7\text{Na}$ ) requires  $m/z$  422.1216, found  $m/z$  422.1217. The enantiomeric excess was determined by HPLC. [AD-H, 230 nm, hexane : IPA = 85 : 15, 1.0 mL/min]: 18.496 min (minor), 22.41 min (major).

**(S,Z)-1-(ethoxycarbonyl)-3-(5-methylthiophen-2-yl)-4-nitrobut-1-enyl benzoate (3ra)**

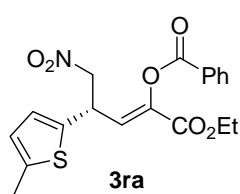

The product was obtained in 94% yield.  $^1\text{H-NMR}$  (400 MHz,  $\text{CDCl}_3$ ):  $\delta$  (ppm) 8.14 (d,  $J = 7.6$  Hz, 2H), 7.66 (t,  $J = 7.2$  Hz, 1H), 7.52 (t,  $J = 7.2$  Hz, 2H), 6.71-6.67 (m, 2H), 6.59 (s, 1H), 4.81 (dd,  $J = 8.0, 15.2$  Hz, 1H), 4.75-4.64 (m, 2H), 4.32-4.23 (m, 2H), 2.43 (s, 3H), 1.27 (t,  $J = 6.6$  Hz, 3H).  $^{13}\text{C-NMR}$  (100 MHz,  $\text{CDCl}_3$ ):  $\delta$  (ppm) 164.3, 161.3, 140.6, 140.3, 136.2, 134.2, 130.6, 128.9, 128.3, 126.7, 125.7, 125.5, 78.8, 62.2, 36.7, 29.8, 15.4, 14.2.  $[\alpha]_{\text{D}}^{20} = -59.5$  ( $c = 1.13$  in  $\text{CHCl}_3$ , 68% ee). IR  $\nu$  max: 3066, 2984, 2958, 2922, 2854, 1731, 1556, 1261, 1083, 708  $\text{cm}^{-1}$ . HRMS: exact mass calculated for  $[\text{M}+\text{Na}]^+$  ( $\text{C}_{19}\text{H}_{19}\text{NSO}_6\text{Na}$ ) requires  $m/z$  412.0831, found  $m/z$  412.0842. The enantiomeric excess was determined by HPLC. [AD-H, 230 nm, hexane : IPA = 90 : 10, 1.0 mL/min]: 14.654 min (minor), 22.33 min (major).

**(R,Z)-methyl 2-(butyryloxy)-5-nitro-4-phenylpent-2-enoate (3ab)**

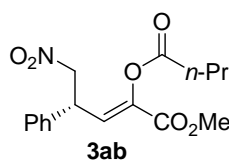

The product was obtained in 51% yield.  $^1\text{H-NMR}$  (400 MHz,  $\text{CDCl}_3$ ):  $\delta$  (ppm) 7.32-7.30 (m, 3H), 7.22 (d,  $J = 6.8$  Hz, 2H), 6.64 (d,  $J = 9.2$  Hz, 1H), 4.73-4.63 (m, 2H), 4.55-4.48 (m, 1H), 3.77 (s, 3H), 2.52-2.48 (m, 2H), 1.77-1.72 (m, 2H), 1.03 (t,  $J = 7.2$  Hz, 3H).  $^{13}\text{C-NMR}$  (100 MHz,  $\text{CDCl}_3$ ):  $\delta$  (ppm) 171.2, 161.9, 140.1, 136.7, 129.5, 128.5, 127.5, 127.3, 78.6, 52.8, 41.2, 35.6, 18.4, 13.7.  $[\alpha]_{\text{D}}^{20} = -65.2$  ( $c = 0.86$  in  $\text{CHCl}_3$ , 96% ee). IR  $\nu$  max: 2963, 2929, 2872, 1764, 1734, 1555  $\text{cm}^{-1}$ . HRMS: exact mass calculated for  $[\text{M}+\text{Na}]^+$  ( $\text{C}_{16}\text{H}_{19}\text{NO}_6\text{Na}$ ) requires  $m/z$  344.1110, found  $m/z$  344.1103. The enantiomeric excess was determined by HPLC. [AS-H, 230 nm, hexane : IPA = 85 : 15, 1.0 mL/min]: 10.725 min (minor), 12.784 min (major).

**(R,Z)-ethyl 2-(butyryloxy)-5-nitro-4-phenylpent-2-enoate (3bb)**

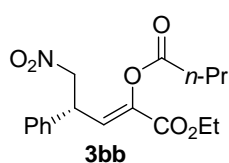

The product was obtained in 50% yield.  $^1\text{H-NMR}$  (400 MHz,  $\text{CDCl}_3$ ):  $\delta$  (ppm) 7.38-7.34 (m, 2H), 7.32-7.30 (m, 1H), 7.24-7.22 (m, 2H), 6.62 (d,  $J = 9.6$  Hz, 1H), 4.73-4.63 (m, 2H), 4.55-4.49 (m, 1H), 4.22 (q,  $J = 7.2$  Hz, 2H), 2.52-2.48 (m, 2H), 1.79-1.70 (m, 2H), 1.28 (t,  $J = 7.2$  Hz, 3H), 1.03 (t,  $J = 7.6$  Hz, 3H).  $^{13}\text{C-NMR}$  (100 MHz,  $\text{CDCl}_3$ ):  $\delta$  (ppm) 171.3, 161.4, 140.4, 136.8, 129.5, 128.4, 127.5, 126.9, 78.5, 62.1, 41.2, 35.6, 18.4, 14.2, 13.7.  $[\alpha]_{\text{D}}^{20} = -57.5$  ( $c = 0.89$  in  $\text{CHCl}_3$ , 83% ee). IR  $\nu$  max: 2966, 2914, 2870, 1763, 1728, 1555  $\text{cm}^{-1}$ . HRMS: exact mass calculated for  $[\text{M}+\text{Na}]^+$  ( $\text{C}_{17}\text{H}_{21}\text{NO}_6\text{Na}$ ) requires  $m/z$  358.1267, found  $m/z$  358.1259. [AS-H, 230 nm, hexane : IPA = 85 : 15, 1.0 mL/min]: 9.026 min (minor), 10.001 min (major).

**(R,Z)-ethyl 2-(butyryloxy)-4-(3-chlorophenyl)-5-nitropent-2-enoate (3fb)**

The product was obtained in 45% yield.  $^1\text{H-NMR}$  (400 MHz,  $\text{CDCl}_3$ ):  $\delta$  (ppm) 7.30-7.29 (m, 2H), 7.23 (s, 1H), 7.15-7.22 (m, 1H), 6.57 (d,  $J = 9.2$  Hz, 1H), 4.72-4.62 (m, 2H), 4.52-4.46 (m, 1H), 4.23 (q,  $J = 7.2$  Hz, 2H), 2.52-2.48 (m, 2H), 1.79-1.70 (m, 2H), 1.29 (t,  $J = 7.0$  Hz, 3H), 1.03 (t,  $J = 7.4$  Hz, 3H).  $^{13}\text{C-NMR}$  (100 MHz,



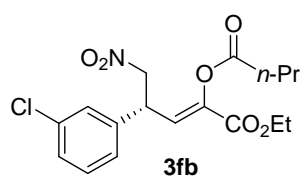

CDCl<sub>3</sub>):  $\delta$  (ppm) 171.2, 161.2, 140.8, 138.8, 135.3, 130.8, 128.7, 127.8, 126.0, 125.7, 78.2, 62.2, 40.8, 35.6, 18.4, 14.2, 13.7.  $[\alpha]_D^{20} = -52.7$  ( $c = 0.83$  in CHCl<sub>3</sub>, 89% ee). IR  $\nu$  max: 2966, 2914, 2872, 1762, 1725, 1553 cm<sup>-1</sup>. HRMS: exact mass calculated for  $[M+Na]^+$  (C<sub>17</sub>H<sub>20</sub>NO<sub>6</sub>ClNa) requires  $m/z$  392.0877, found  $m/z$  392.0876. [AS-H, 230 nm, hexane : IPA = 85 : 15, 1.0 mL/min]: 9.831 min (minor), 10.993 min (major).

**(R,Z)-ethyl 4-(3-bromophenyl)-2-(butyryloxy)-5-nitropent-2-enoate (3gb)**

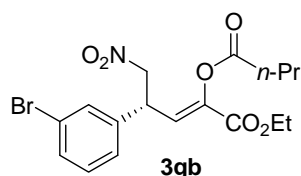

The product was obtained in 43% yield. <sup>1</sup>H NMR (400 MHz, CDCl<sub>3</sub>):  $\delta$  (ppm) 7.46-7.43 (m, 1H), 7.38 (t,  $J = 1.8$  Hz, 1H), 7.23 (t,  $J = 7.8$  Hz, 1H), 7.16 (d,  $J = 7.8$  Hz, 1H), 6.56 (d,  $J = 9.6$  Hz, 1H), 4.71-4.61 (m, 2H), 4.51-4.45 (m, 1H), 4.23 (q,  $J = 7.2$  Hz, 2H), 2.52-2.48 (m, 2H), 1.79-1.70 (m, 2H), 1.29 (t,  $J = 7.2$  Hz, 3H), 1.03 (t,  $J = 7.4$  Hz, 3H). <sup>13</sup>C NMR (100 MHz, CDCl<sub>3</sub>):  $\delta$  (ppm) 171.2, 161.2, 140.8, 139.1, 131.7, 131.0, 130.7, 126.2, 126.0, 123.4, 78.2, 62.2, 40.7, 35.6, 18.4, 14.2, 13.7.  $[\alpha]_D^{20} = -50.0$  ( $c = 0.89$  in CHCl<sub>3</sub>, 90% ee). IR  $\nu$  max: 2965, 2926, 2866, 1763, 1728, 1555 cm<sup>-1</sup>. HRMS: exact mass calculated for  $[M+Na]^+$  (C<sub>17</sub>H<sub>20</sub>NO<sub>6</sub>BrNa) requires  $m/z$  436.0372, found  $m/z$  436.0367. [AS-H, 230 nm, hexane : IPA = 85 : 15, 1.0 mL/min]: 10.724 min (minor), 11.888 min (major).

**(R,Z)-ethyl 2-(butyryloxy)-5-nitro-4-(3-nitrophenyl)pent-2-enoate (3ib)**

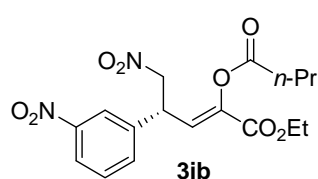

The product was obtained in 61% yield. <sup>1</sup>H NMR (400 MHz, CDCl<sub>3</sub>):  $\delta$  (ppm) 8.20-8.17 (m, 1H), 8.14-8.13 (m, 1H), 7.60-7.54 (m, 2H), 6.60 (d,  $J = 9.2$  Hz, 1H), 4.80-4.70 (m, 2H), 4.66-4.60 (m, 1H), 4.24 (q,  $J = 7.2$  Hz, 2H), 2.54-2.50 (m, 2H), 1.78-1.72 (m, 2H), 1.29 (t,  $J = 7.2$  Hz, 3H), 1.03 (t,  $J = 7.4$  Hz, 3H). <sup>13</sup>C NMR (100 MHz, CDCl<sub>3</sub>):  $\delta$  (ppm) 171.2, 161.0, 141.3, 139.0, 133.8, 130.6, 125.1, 123.5, 122.6, 77.8, 62.3, 40.7, 35.6, 18.4, 14.2, 13.7.  $[\alpha]_D^{20} = -43.1$  ( $c = 1.16$  in CHCl<sub>3</sub>, 82% ee). IR  $\nu$  max: 2967, 2929, 2876, 1763, 1729, 1556, 1531, 1351 cm<sup>-1</sup>. HRMS: exact mass calculated for  $[M+Na]^+$  (C<sub>17</sub>H<sub>20</sub>N<sub>2</sub>O<sub>8</sub>Na) requires  $m/z$  403.1117, found  $m/z$  403.1130. [AS-H, 230 nm, hexane : IPA = 85 : 15, 1.0 mL/min]: 26.827 min (minor), 30.03 min (major).

**(R,Z)-ethyl 2-(butyryloxy)-4-(3-methoxyphenyl)-5-nitropent-2-enoate (3kb)**

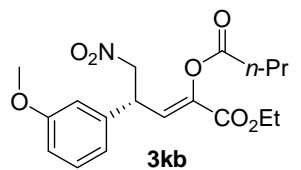

The product was obtained in 63% yield. <sup>1</sup>H NMR (400 MHz, CDCl<sub>3</sub>):  $\delta$  (ppm) 7.27 (t,  $J = 7.8$  Hz, 1H), 6.84-6.80 (m, 2H), 6.75 (t,  $J = 2.0$  Hz, 1H), 6.60 (d,  $J = 9.6$  Hz, 1H), 4.72-4.61 (m, 2H), 4.52-4.45 (m, 1H), 4.22 (q,  $J = 7.2$  Hz, 2H), 3.79 (s, 3H), 2.52-2.48 (m, 2H), 1.79-1.71 (m, 2H), 1.28 (t,  $J = 7.0$  Hz, 3H), 1.03 (t,  $J = 7.4$  Hz, 3H). <sup>13</sup>C NMR (100 MHz, CDCl<sub>3</sub>):  $\delta$  (ppm) 171.3, 161.4, 160.3, 140.4, 138.3, 130.5, 126.8, 119.6, 113.7, 113.5, 78.4, 62.1, 55.4, 41.1, 35.6, 18.4, 14.2, 13.7.  $[\alpha]_D^{20} = -47.9$  ( $c = 1.15$  in CHCl<sub>3</sub>, 73% ee). IR  $\nu$  max: 2966, 2936, 2872, 1763, 1728, 1554 cm<sup>-1</sup>. HRMS: exact mass calculated for  $[M+H]^+$  (C<sub>18</sub>H<sub>24</sub>NO<sub>7</sub>) requires  $m/z$  366.1553, found  $m/z$  366.1549. [AD-H, 230 nm, hexane : IPA = 90 : 10, 1.0 mL/min]: 12.418 min (major), 12.784 min (minor).

**(R,Z)-ethyl 2-(butyryloxy)-4-(4-fluorophenyl)-5-nitropent-2-enoate (3lb)**

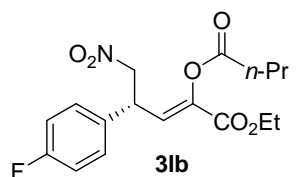

The product was obtained in 69% yield. <sup>1</sup>H NMR (400 MHz, CDCl<sub>3</sub>):  $\delta$  (ppm) 7.23-7.19 (m, 2H), 7.07-7.02 (m, 2H), 6.58 (d,  $J = 9.6$  Hz, 1H), 4.70-4.61 (m, 2H), 4.53-4.47 (m, 1H), 4.23 (q,  $J = 7.2$  Hz, 2H), 2.54-2.45 (m, 2H), 1.79-1.70 (m, 2H), 1.28 (t,  $J = 7.0$  Hz, 3H), 1.03 (t,  $J = 7.4$  Hz, 3H). <sup>13</sup>C NMR (100 MHz, CDCl<sub>3</sub>):  $\delta$  (ppm) 171.2, 163.8, 161.3, 140.5, 132.6 (d,  $J_{C-F} = 3.3$  Hz), 129.2 (d,  $J_{C-F} = 8.1$  Hz), 126.5, 116.5 (d,  $J_{C-F} = 21.5$  Hz), 78.5, 62.2, 40.5, 35.6, 18.4, 14.2, 13.7.  $[\alpha]_D^{20} = -33.7$  ( $c = 1.18$  in CHCl<sub>3</sub>, 84%

ee). IR  $\nu$  max: 2966, 2920, 2866, 1761, 1719, 1553  $\text{cm}^{-1}$ . HRMS: exact mass calculated for  $[\text{M}+\text{H}]^+$  ( $\text{C}_{17}\text{H}_{21}\text{NO}_6\text{F}$ ) requires  $m/z$  354.1353, found  $m/z$  354.1346. [AS-H, 230 nm, hexane : IPA = 85 : 15, 1.0 mL/min]: 10.008 min (minor), 11.632 min (major).

**(R,Z)-ethyl 2-(butyryloxy)-4-(4-chlorophenyl)-5-nitropent-2-enoate (3mb)**

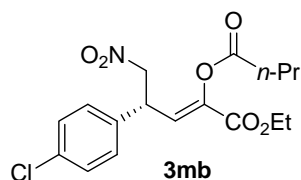

The product was obtained in 55% yield.  $^1\text{H}$  NMR (400 MHz,  $\text{CDCl}_3$ ):  $\delta$  (ppm) 7.34-7.32 (m, 2H), 7.18-7.16 (m, 2H), 6.56 (d,  $J = 9.6$  Hz, 1H), 4.70-4.60 (m, 2H), 4.52-4.46 (m, 1H), 4.23 (q,  $J = 7.2$  Hz, 2H), 2.54-2.45 (m, 2H), 1.79-1.70 (m, 2H), 1.28 (t,  $J = 7.0$  Hz, 3H), 1.03 (t,  $J = 7.4$  Hz, 3H).  $^{13}\text{C}$  NMR (100 MHz,  $\text{CDCl}_3$ ):  $\delta$  (ppm) 171.2, 161.2, 140.6, 135.3, 134.5, 129.7, 128.9, 126.2, 78.3, 62.2, 40.6, 35.6, 18.4, 14.2, 13.7.  $[\alpha]_D^{20} = -69.5$  ( $c = 1.03$  in  $\text{CHCl}_3$ , 88% ee). IR  $\nu$  max: 2967, 2933, 2876, 1763, 1728, 1555  $\text{cm}^{-1}$ . HRMS: exact mass calculated for  $[\text{M}+\text{Na}]^+$  ( $\text{C}_{17}\text{H}_{20}\text{NO}_6\text{ClNa}$ ) requires  $m/z$  392.0877, found  $m/z$  392.0881. [AS-H, 230 nm, hexane : IPA = 85 : 15, 1.0 mL/min]: 10.533 min (minor), 12.037 min (major).

**(R,Z)-ethyl 4-(4-bromophenyl)-2-(butyryloxy)-5-nitropent-2-enoate (3nb)**

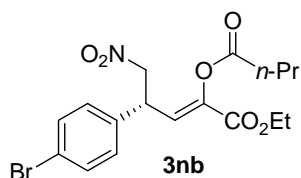

The product was obtained in 50% yield.  $^1\text{H}$  NMR (400 MHz,  $\text{CDCl}_3$ ):  $\delta$  (ppm) 7.48 (d,  $J = 8.4$  Hz, 2H), 7.11 (d,  $J = 8.4$  Hz, 2H), 6.56 (d,  $J = 9.2$  Hz, 1H), 4.70-4.61 (m, 2H), 4.50-4.44 (m, 1H), 4.22 (q,  $J = 7.2$  Hz, 2H), 2.51-2.47 (m, 2H), 1.79-1.69 (m, 2H), 1.28 (t,  $J = 7.2$  Hz, 3H), 1.02 (t,  $J = 7.4$  Hz, 3H).  $^{13}\text{C}$  NMR (100 MHz,  $\text{CDCl}_3$ ):  $\delta$  (ppm) 171.2, 161.2, 140.7, 135.8, 132.6, 129.2, 126.1, 122.5, 78.2, 62.2, 40.6, 35.6, 18.4, 14.2, 13.7.  $[\alpha]_D^{20} = -52.1$  ( $c = 1.03$  in  $\text{CHCl}_3$ , 94% ee). IR  $\nu$  max: 2967, 2933, 2872, 1763, 1728, 1555  $\text{cm}^{-1}$ . HRMS: exact mass calculated for  $[\text{M}+\text{Na}]^+$  ( $\text{C}_{17}\text{H}_{20}\text{NO}_6\text{BrNa}$ ) requires  $m/z$  436.0372, found  $m/z$  436.0381. [AS-H, 230 nm, hexane : IPA = 85 : 15, 1.0 mL/min]: 11.29 min (minor), 12.877 min (major).

**(R,Z)-ethyl 2-(butyryloxy)-5-nitro-4-p-tolylpent-2-enoate (3pb)**

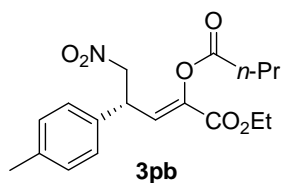

The product was obtained in 54% yield.  $^1\text{H}$  NMR (400 MHz,  $\text{CDCl}_3$ ):  $\delta$  (ppm) 7.16 (d,  $J = 8.0$  Hz, 2H), 7.11 (d,  $J = 8.0$  Hz, 2H), 6.60 (d,  $J = 9.6$  Hz, 1H), 4.71-4.61 (m, 2H), 4.51-4.44 (m, 1H), 4.22 (q,  $J = 7.2$  Hz, 2H), 2.52-2.48 (m, 2H), 2.32 (s, 3H), 1.80-1.70 (m, 2H), 1.28 (t,  $J = 7.2$  Hz, 3H), 1.03 (t,  $J = 7.4$  Hz, 3H).  $^{13}\text{C}$  NMR (100 MHz,  $\text{CDCl}_3$ ):  $\delta$  (ppm) 171.3, 161.4, 140.2, 138.3, 133.7, 130.1, 127.4, 127.2, 78.6, 62.0, 40.9, 35.6, 21.2, 18.4, 14.2, 13.7.  $[\alpha]_D^{20} = -58.7$  ( $c = 0.94$  in  $\text{CHCl}_3$ , 78% ee). IR  $\nu$  max: 2966, 2929, 2872, 1764, 1728, 1555  $\text{cm}^{-1}$ . HRMS: exact mass calculated for  $[\text{M}+\text{Na}]^+$  ( $\text{C}_{18}\text{H}_{23}\text{NO}_6\text{Na}$ ) requires  $m/z$  372.1423, found  $m/z$  372.1422. [AS-H, 230 nm, hexane : IPA = 85 : 15, 1.0 mL/min]: 8.204 min (minor), 9.236 min (major).

## E: CSP-HPLC Analysis of Michael-type Products

### (*R,Z*)-1-(methoxycarbonyl)-4-nitro-3-phenylbut-1-enyl benzoate (**3aa**)

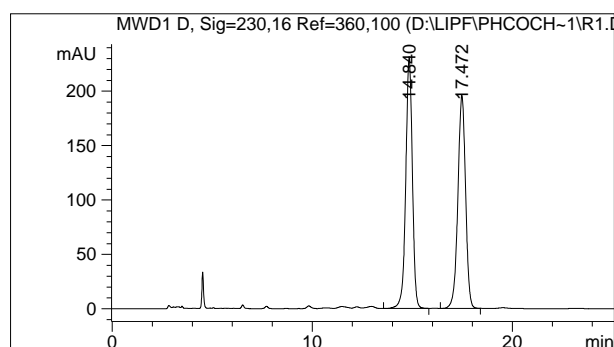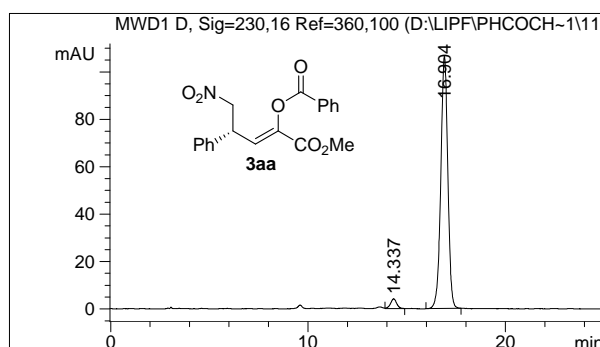

Racemic adduct

Chiral adduct

| # | time   | Area   | Height | Width  | Area%  | Symmetry | # | Time   | Area   | Height | Width  | Area%  | Symmetry |
|---|--------|--------|--------|--------|--------|----------|---|--------|--------|--------|--------|--------|----------|
| 1 | 14.84  | 5326.2 | 231.6  | 0.3523 | 50.282 | 1.049    | 1 | 14.337 | 89.9   | 4.1    | 0.3212 | 3.297  | 1.004    |
| 2 | 17.472 | 5266.6 | 196.4  | 0.4148 | 49.718 | 1.041    | 2 | 16.904 | 2636.9 | 106.4  | 0.3791 | 96.703 | 1.018    |

### (*R,Z*)-1-(ethoxycarbonyl)-4-nitro-3-phenylbut-1-enyl benzoate (**3ba**)

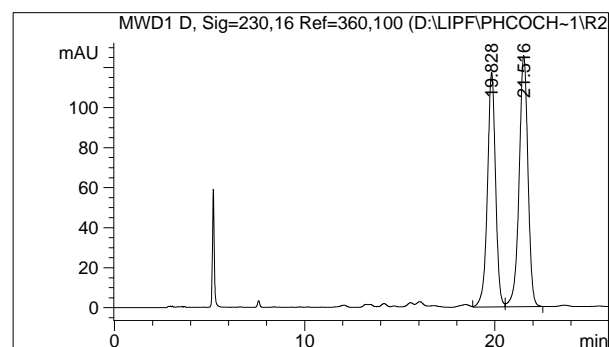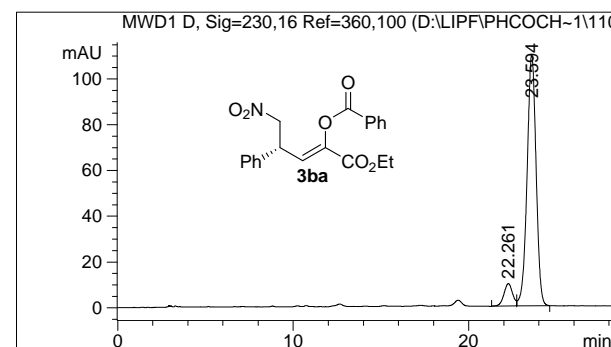

Racemic adduct

Chiral adduct

| # | time   | Area   | Height | Width  | Area%  | Symmetry | # | Time   | Area | Height | Width  | Area%  | Symmetry |
|---|--------|--------|--------|--------|--------|----------|---|--------|------|--------|--------|--------|----------|
| 1 | 19.828 | 3490   | 117.3  | 0.4571 | 46.244 | 1.039    | 1 | 22.261 | 341  | 9.9    | 0.5217 | 8.005  | 1.035    |
| 2 | 21.516 | 4056.9 | 125.5  | 0.495  | 53.756 | 1.072    | 2 | 23.594 | 3919 | 109.6  | 0.5531 | 91.995 | 1.041    |

### (*R,Z*)-1-(isopropoxycarbonyl)-4-nitro-3-phenylbut-1-enyl benzoate (**3ca**)

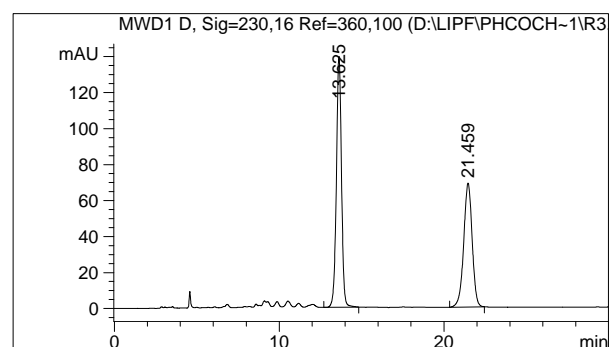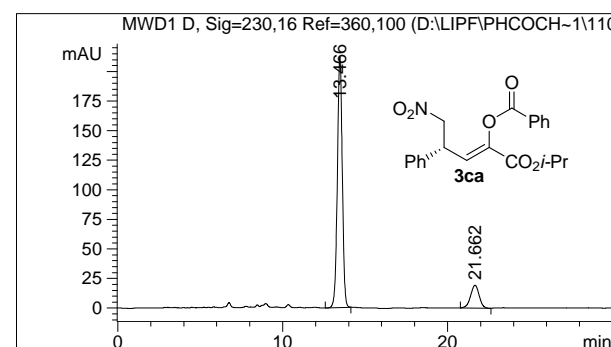

Racemic adduct

Chiral adduct

| # | Time   | Area   | Height | Width  | Area%  | Symmetry | # | Time   | Area   | Height | Width  | Area%  | Symmetry |
|---|--------|--------|--------|--------|--------|----------|---|--------|--------|--------|--------|--------|----------|
| 1 | 13.625 | 2994.9 | 139.4  | 0.3286 | 54.888 | 0.992    | 1 | 13.466 | 4392.5 | 212.3  | 0.3213 | 86.232 | 1.001    |
| 2 | 21.459 | 2461.5 | 69     | 0.5501 | 45.112 | 1.049    | 2 | 21.662 | 701.3  | 19.4   | 0.5557 | 13.768 | 1.049    |

**(R,Z)-1-(ethoxycarbonyl)-3-(2-chlorophenyl)-4-nitrobut-1-enyl benzoate (3da)**

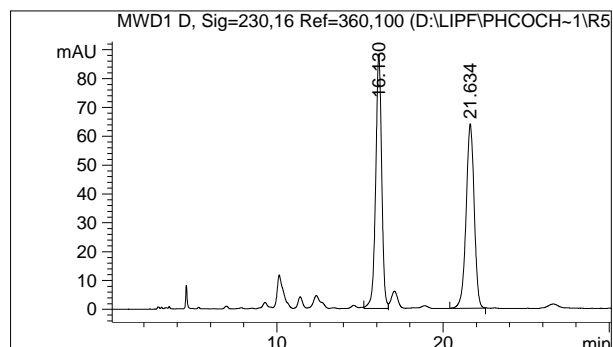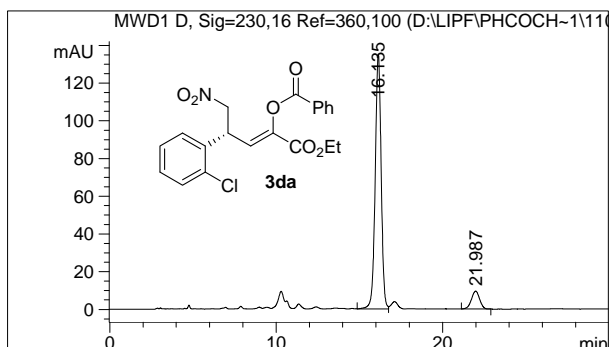

| Racemic adduct |        |        |        |        |        |          | Chiral adduct |        |        |        |        |        |          |
|----------------|--------|--------|--------|--------|--------|----------|---------------|--------|--------|--------|--------|--------|----------|
| #              | Time   | Area   | Height | Width  | Area%  | Symmetry | #             | Time   | Area   | Height | Width  | Area%  | Symmetry |
| 1              | 16.13  | 2209.6 | 88.1   | 0.3846 | 50.521 | 1.061    | 1             | 16.135 | 3360.4 | 135    | 0.3843 | 91.122 | 1.036    |
| 2              | 21.634 | 2164   | 64     | 0.5188 | 49.479 | 1.054    | 2             | 21.987 | 327.4  | 9.5    | 0.5086 | 8.878  | 1.025    |

**(R,Z)-1-(ethoxycarbonyl)-3-(2-bromophenyl)-4-nitrobut-1-enyl benzoate (3ea)**

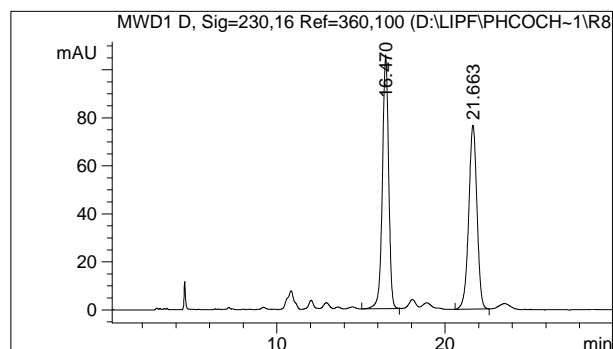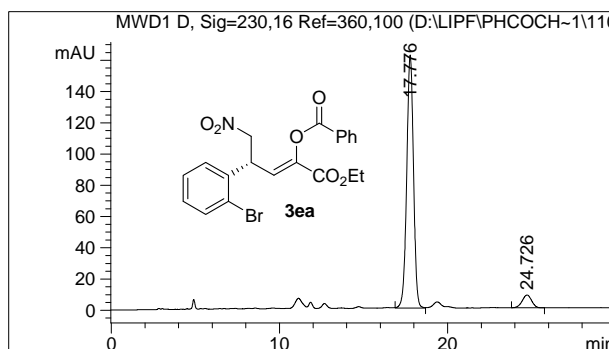

| Racemic adduct |        |        |        |        |        |          | Chiral adduct |        |        |        |        |        |          |
|----------------|--------|--------|--------|--------|--------|----------|---------------|--------|--------|--------|--------|--------|----------|
| #              | Time   | Area   | Height | Width  | Area%  | Symmetry | #             | Time   | Area   | Height | Width  | Area%  | Symmetry |
| 1              | 16.47  | 2722.6 | 105.8  | 0.3963 | 51.059 | 1.074    | 1             | 17.776 | 4527.9 | 162    | 0.432  | 93.386 | 1.028    |
| 2              | 21.663 | 2609.7 | 76.6   | 0.5256 | 48.941 | 1.035    | 2             | 24.726 | 320.7  | 8.2    | 0.5451 | 6.614  | 1.054    |

**(R,Z)-1-(ethoxycarbonyl)-3-(3-chlorophenyl)-4-nitrobut-1-enyl benzoate (3fa)**

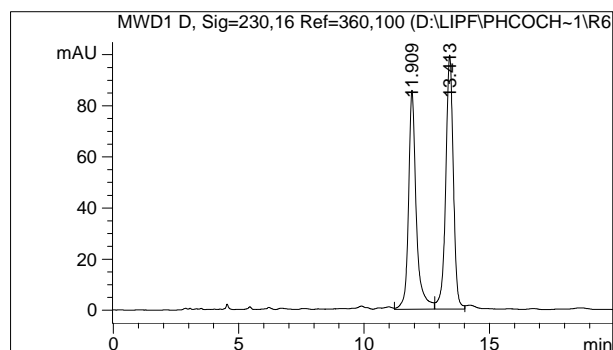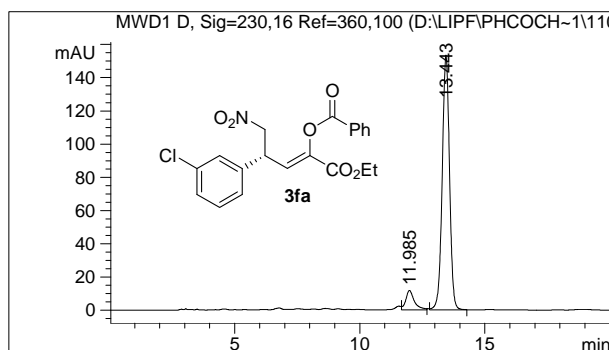

| Racemic adduct |        |        |        |        |        |          | Chiral adduct |        |       |        |        |        |          |
|----------------|--------|--------|--------|--------|--------|----------|---------------|--------|-------|--------|--------|--------|----------|
| #              | Time   | Area   | Height | Width  | Area%  | Symmetry | #             | Time   | Area  | Height | Width  | Area%  | Symmetry |
| 1              | 11.909 | 1827.8 | 85.7   | 0.3128 | 46.636 | 0.748    | 1             | 11.985 | 281.1 | 11.7   | 0.3455 | 8.280  | 0.689    |
| 2              | 13.413 | 2091.5 | 99.4   | 0.3214 | 53.364 | 1.044    | 2             | 13.443 | 3114  | 153.5  | 0.3127 | 91.720 | 1.005    |

**(R,Z)-1-(ethoxycarbonyl)-3-(3-bromophenyl)-4-nitrobut-1-enyl benzoate (3ga)**

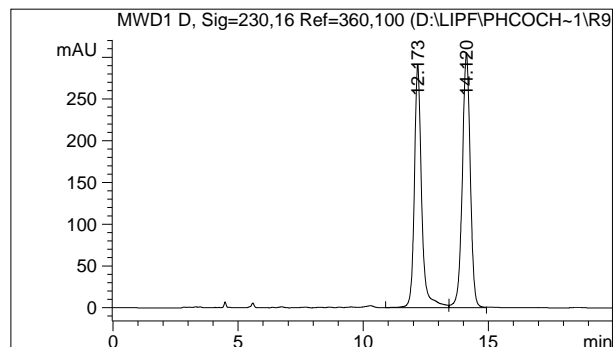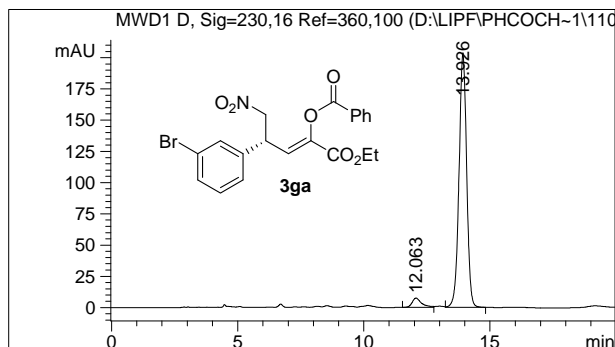

| Racemic adduct |        |        |        |        |        |          | Chiral adduct |        |        |        |        |        |          |
|----------------|--------|--------|--------|--------|--------|----------|---------------|--------|--------|--------|--------|--------|----------|
| #              | Time   | Area   | Height | Width  | Area%  | Symmetry | #             | Time   | Area   | Height | Width  | Area%  | Symmetry |
| 1              | 12.173 | 5907.5 | 291.4  | 0.3025 | 46.654 | 0.767    | 1             | 12.063 | 200.6  | 7.5    | 0.3881 | 4.467  | 0.613    |
| 2              | 14.12  | 6754.9 | 305.5  | 0.34   | 53.346 | 1.026    | 2             | 13.926 | 4289.7 | 203.8  | 0.3235 | 95.533 | 1.017    |

**(R,Z)-1-(methoxycarbonyl)-4-nitro-3-(3-nitrophenyl)but-1-enyl benzoate (3ha)**

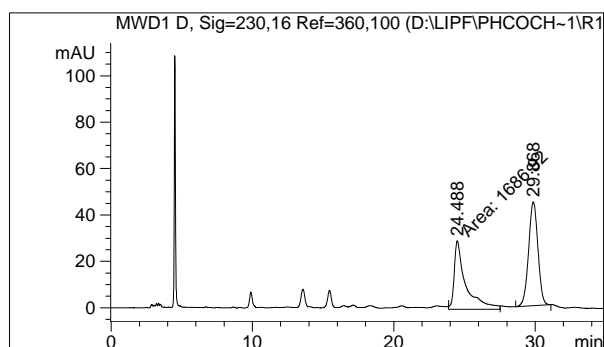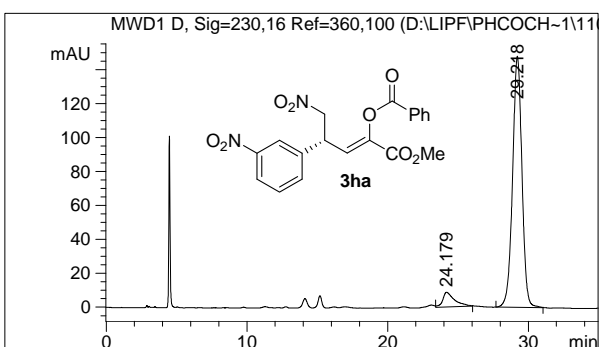

| Racemic adduct |        |        |        |        |        |          | Chiral adduct |        |        |        |        |        |          |
|----------------|--------|--------|--------|--------|--------|----------|---------------|--------|--------|--------|--------|--------|----------|
| #              | Time   | Area   | Height | Width  | Area%  | Symmetry | #             | Time   | Area   | Height | Width  | Area%  | Symmetry |
| 1              | 24.488 | 1686.9 | 29.5   | 0.9522 | 45.209 | 0.342    | 1             | 24.179 | 502.7  | 8.7    | 0.7569 | 6.831  | 0.464    |
| 2              | 29.868 | 2044.4 | 44.8   | 0.7085 | 54.791 | 0.988    | 2             | 29.218 | 6857.2 | 148    | 0.7126 | 93.169 | 1.016    |

**(R,Z)-1-(ethoxycarbonyl)-4-nitro-3-(3-nitrophenyl)but-1-enyl benzoate (3ia)**

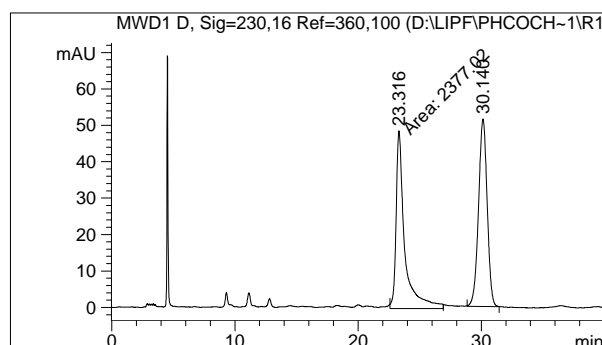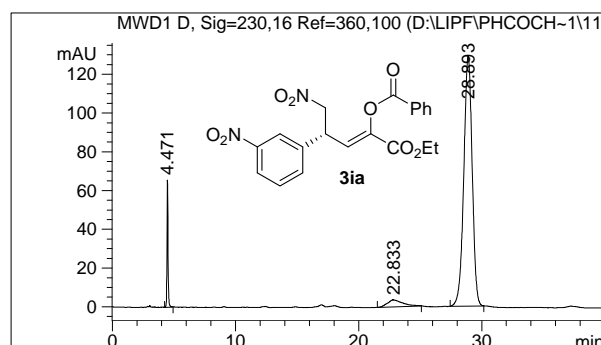

| Racemic adduct |        |        |        |        |        |          | Chiral adduct |        |        |        |        |        |          |
|----------------|--------|--------|--------|--------|--------|----------|---------------|--------|--------|--------|--------|--------|----------|
| #              | Time   | Area   | Height | Width  | Area%  | Symmetry | #             | Time   | Area   | Height | Width  | Area%  | Symmetry |
| 1              | 23.316 | 2377   | 48.9   | 0.8107 | 48.599 | 0.472    | 1             | 22.833 | 324.9  | 3.7    | 1.0488 | 5.037  | 0.62     |
| 2              | 30.14  | 2514.1 | 51.5   | 0.7377 | 51.401 | 1.038    | 2             | 28.893 | 6125.5 | 129.2  | 0.7351 | 94.963 | 1.05     |

**(R,Z)-1-(ethoxycarbonyl)-4-nitro-3-m-tolylbut-1-enyl benzoate (3ja)**

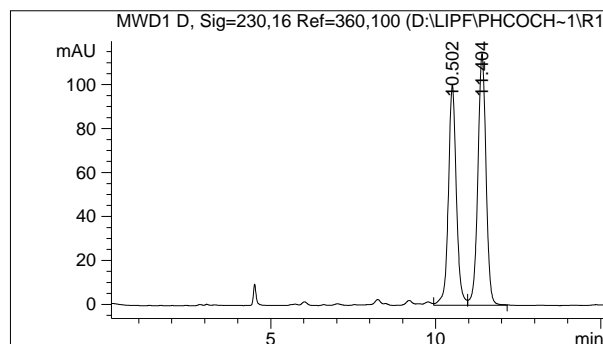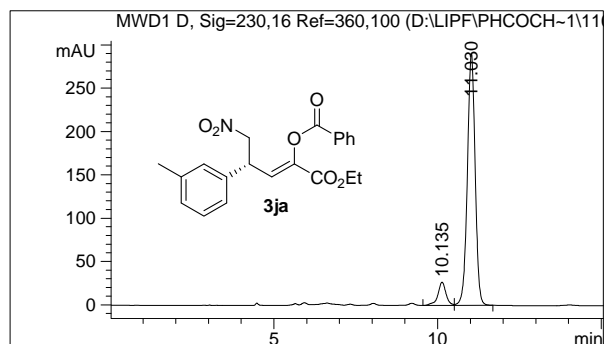

| Racemic adduct |        |        |        |        |        |          | Chiral adduct |        |        |        |        |        |          |
|----------------|--------|--------|--------|--------|--------|----------|---------------|--------|--------|--------|--------|--------|----------|
| #              | Time   | Area   | Height | Width  | Area%  | Symmetry | #             | Time   | Area   | Height | Width  | Area%  | Symmetry |
| 1              | 10.502 | 1681.6 | 100.5  | 0.2533 | 46.060 | 0.938    | 1             | 10.135 | 468.1  | 26.9   | 0.2611 | 8.876  | 1.068    |
| 2              | 11.404 | 1969.3 | 114.5  | 0.2647 | 53.940 | 0.998    | 2             | 11.03  | 4805.3 | 290.6  | 0.2549 | 91.124 | 1.017    |

**(R,Z)-1-(ethoxycarbonyl)-3-(3-methoxyphenyl)-4-nitrobut-1-enyl benzoate (3ka)**

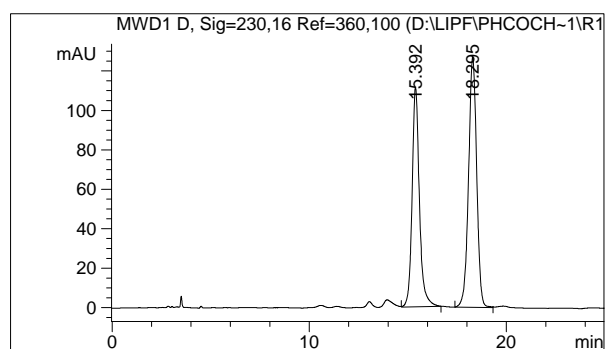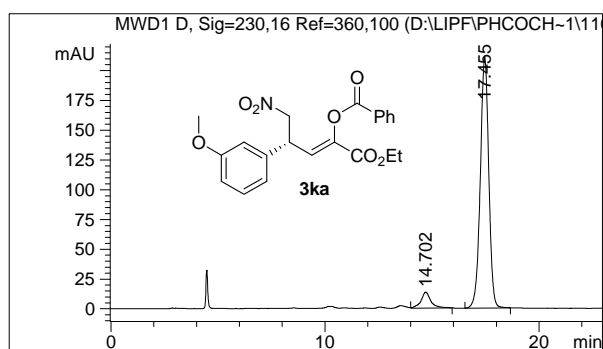

| Racemic adduct |        |        |        |        |        |          | Chiral adduct |        |        |        |        |        |          |
|----------------|--------|--------|--------|--------|--------|----------|---------------|--------|--------|--------|--------|--------|----------|
| #              | Time   | Area   | Height | Width  | Area%  | Symmetry | #             | Time   | Area   | Height | Width  | Area%  | Symmetry |
| 1              | 15.392 | 2863.6 | 111.3  | 0.3861 | 43.969 | 0.823    | 1             | 14.702 | 439    | 13.5   | 0.4679 | 7.057  | 0.87     |
| 2              | 18.295 | 3649.2 | 127.2  | 0.4428 | 56.031 | 1.024    | 2             | 17.455 | 5782.2 | 211.1  | 0.4195 | 92.943 | 1.024    |

**(R,Z)-1-(ethoxycarbonyl)-3-(4-fluorophenyl)-4-nitrobut-1-enyl benzoate (3la)**

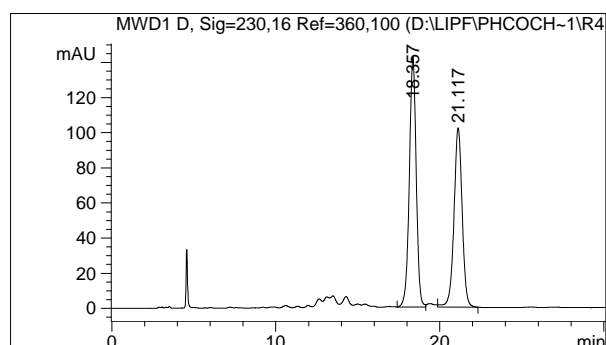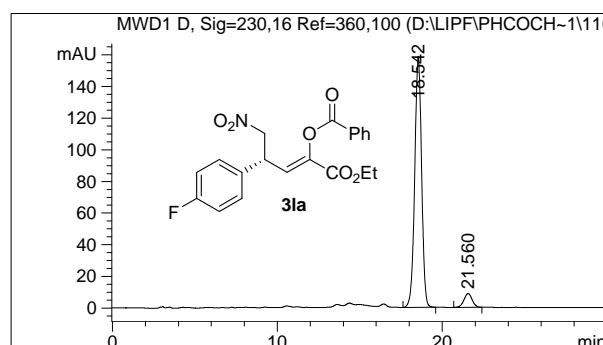

| Racemic adduct |        |        |        |        |        |          | Chiral adduct |        |       |        |        |        |          |
|----------------|--------|--------|--------|--------|--------|----------|---------------|--------|-------|--------|--------|--------|----------|
| #              | Time   | Area   | Height | Width  | Area%  | Symmetry | #             | Time   | Area  | Height | Width  | Area%  | Symmetry |
| 1              | 18.357 | 4149.9 | 142.7  | 0.4473 | 53.823 | 1.03     | 1             | 18.542 | 4588  | 158.6  | 0.4474 | 93.759 | 1.018    |
| 2              | 21.117 | 3560.4 | 102.2  | 0.5303 | 46.177 | 1.022    | 2             | 21.56  | 305.4 | 8.7    | 0.5224 | 6.241  | 0.991    |

**(R,Z)-1-(ethoxycarbonyl)-3-(4-chlorophenyl)-4-nitrobut-1-enyl benzoate (3ma)**

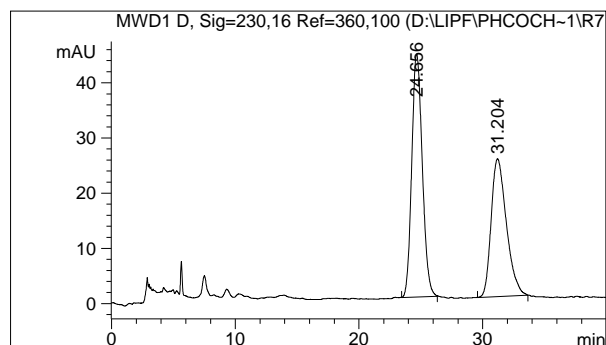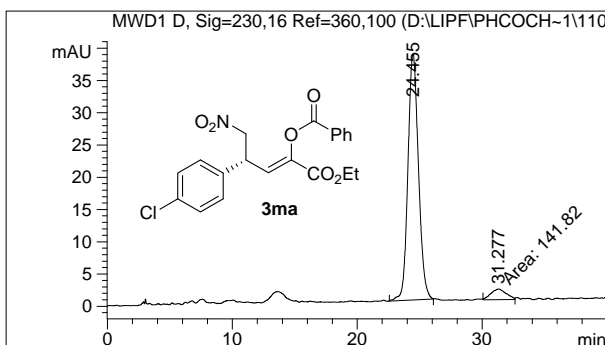

| Racemic adduct |        |        |        |        |        | Chiral adduct |   |        |        |        |        |        |          |
|----------------|--------|--------|--------|--------|--------|---------------|---|--------|--------|--------|--------|--------|----------|
| #              | Time   | Area   | Height | Width  | Area%  | Symmetry      | # | Time   | Area   | Height | Width  | Area%  | Symmetry |
| 1              | 24.656 | 2602.5 | 44     | 0.8955 | 54.924 | 0.81          | 1 | 24.455 | 2234.2 | 38.1   | 0.8636 | 94.031 | 0.885    |
| 2              | 31.204 | 2135.8 | 25     | 1.1443 | 45.076 | 0.685         | 2 | 31.277 | 141.8  | 1.7    | 1.4298 | 5.969  | 0.892    |

**(R,Z)-1-(ethoxycarbonyl)-3-(4-bromophenyl)-4-nitrobut-1-enyl benzoate (3na)**

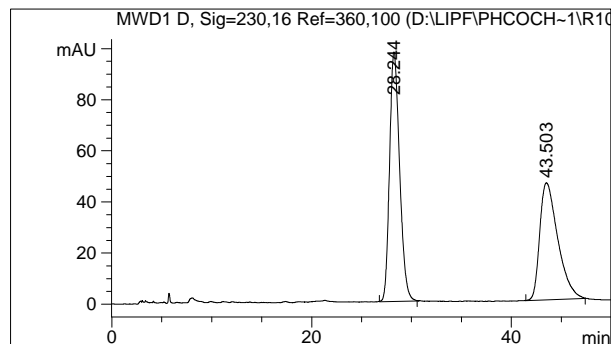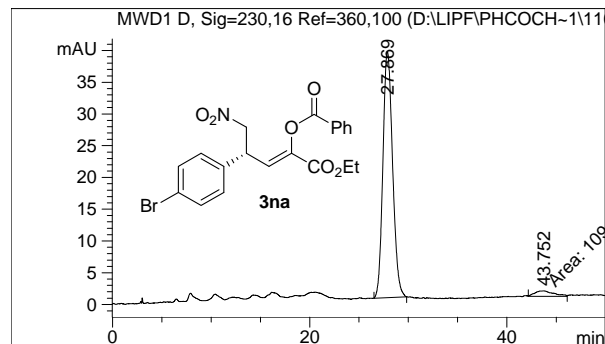

| Racemic adduct |        |        |        |        |        | Chiral adduct |   |        |       |        |        |        |          |
|----------------|--------|--------|--------|--------|--------|---------------|---|--------|-------|--------|--------|--------|----------|
| #              | Time   | Area   | Height | Width  | Area%  | Symmetry      | # | Time   | Area  | Height | Width  | Area%  | Symmetry |
| 1              | 28.244 | 6812.8 | 97.6   | 1.0484 | 54.295 | 0.75          | 1 | 27.869 | 2646  | 38.8   | 1.0261 | 96.014 | 0.806    |
| 2              | 43.503 | 5734.9 | 45.8   | 1.4763 | 45.705 | 0.562         | 2 | 43.752 | 109.8 | 8.5E-1 | 2.1473 | 3.986  | 0.883    |

**(R,Z)-1-(ethoxycarbonyl)-4-nitro-3-(4-nitrophenyl)but-1-enyl benzoate (3oa)**

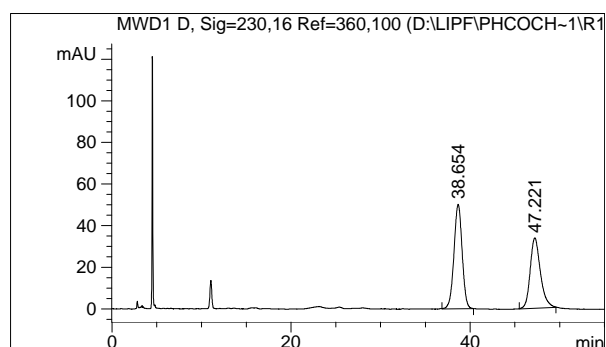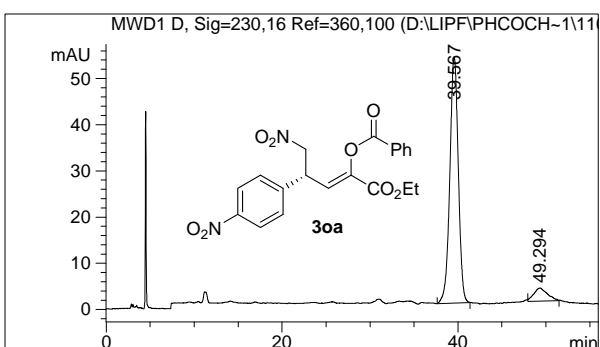

| Racemic adduct |        |        |        |        |        | Chiral adduct |   |        |        |        |        |        |          |
|----------------|--------|--------|--------|--------|--------|---------------|---|--------|--------|--------|--------|--------|----------|
| #              | Time   | Area   | Height | Width  | Area%  | Symmetry      | # | Time   | Area   | Height | Width  | Area%  | Symmetry |
| 1              | 38.654 | 3201.2 | 50.3   | 0.9751 | 54.461 | 1.027         | 1 | 39.567 | 3565.4 | 53.3   | 0.9823 | 92.119 | 1.027    |
| 2              | 47.221 | 2676.7 | 33.8   | 1.1105 | 45.539 | 0.8           | 2 | 49.294 | 305    | 2.8    | 1.2698 | 7.881  | 0.757    |

**(R,Z)-1-(ethoxycarbonyl)-4-nitro-3-p-tolylbut-1-enyl benzoate (3pa)**

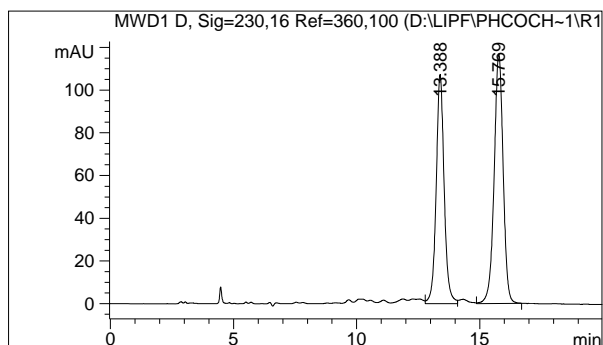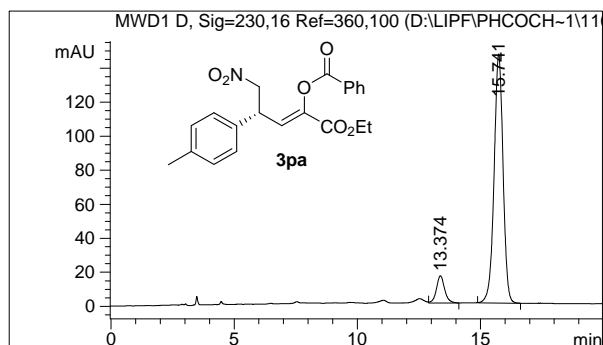

| Racemic adduct |        |        |        |        |        | Chiral adduct |   |        |        |        |        |        |          |
|----------------|--------|--------|--------|--------|--------|---------------|---|--------|--------|--------|--------|--------|----------|
| #              | Time   | Area   | Height | Width  | Area%  | Symmetry      | # | Time   | Area   | Height | Width  | Area%  | Symmetry |
| 1              | 13.388 | 2410.3 | 107.4  | 0.3399 | 44.702 | 0.923         | 1 | 13.374 | 372.2  | 16.1   | 0.3445 | 9.128  | 0.899    |
| 2              | 15.769 | 2981.6 | 116.9  | 0.3916 | 55.298 | 1.032         | 2 | 15.741 | 3705.3 | 146.5  | 0.3912 | 90.872 | 1.036    |

**(R,Z)-1-(ethoxycarbonyl)-3-(4-methoxyphenyl)-4-nitrobut-1-enyl benzoate (3qa)**

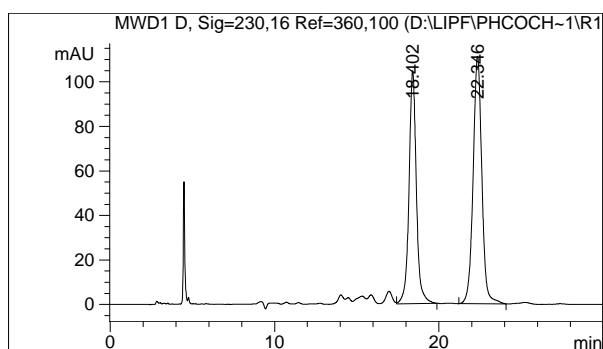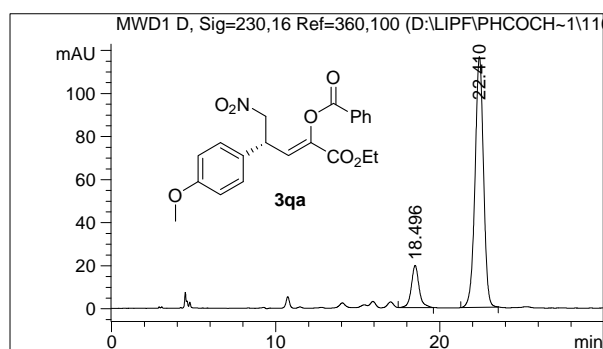

| Racemic adduct |        |        |        |        |        | Chiral adduct |   |        |        |        |        |        |          |
|----------------|--------|--------|--------|--------|--------|---------------|---|--------|--------|--------|--------|--------|----------|
| #              | Time   | Area   | Height | Width  | Area%  | Symmetry      | # | Time   | Area   | Height | Width  | Area%  | Symmetry |
| 1              | 18.402 | 3252.8 | 104.5  | 0.4712 | 44.251 | 0.939         | 1 | 18.496 | 646.7  | 19.7   | 0.4875 | 13.402 | 0.924    |
| 2              | 22.346 | 4098.1 | 111.2  | 0.5621 | 55.749 | 0.963         | 2 | 22.41  | 4178.8 | 116.5  | 0.5525 | 86.598 | 1.036    |

**(S,Z)-1-(ethoxycarbonyl)-3-(5-methylthiophen-2-yl)-4-nitrobut-1-enyl benzoate (3ra)**

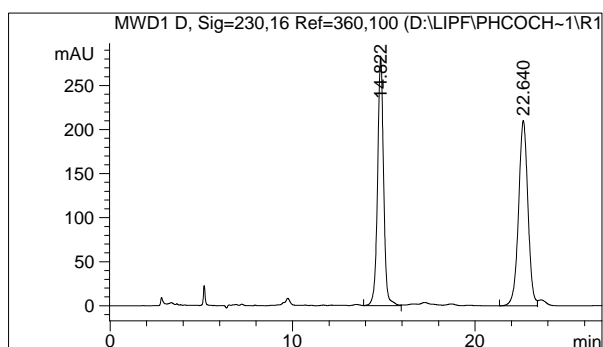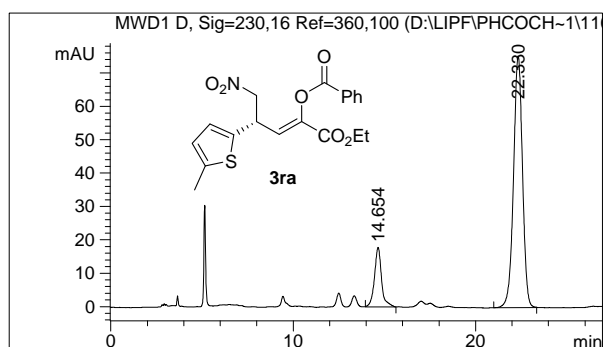

| Racemic adduct |        |        |        |        |        | Chiral adduct |   |        |        |        |        |        |          |
|----------------|--------|--------|--------|--------|--------|---------------|---|--------|--------|--------|--------|--------|----------|
| #              | Time   | Area   | Height | Width  | Area%  | Symmetry      | # | Time   | Area   | Height | Width  | Area%  | Symmetry |
| 1              | 14.822 | 6475.1 | 283.3  | 0.3486 | 46.341 | 0.963         | 1 | 14.654 | 482.7  | 17.9   | 0.4034 | 15.773 | 0.992    |
| 2              | 22.64  | 7497.5 | 210.1  | 0.5482 | 53.659 | 0.993         | 2 | 22.33  | 2577.6 | 75.4   | 0.5288 | 84.227 | 1.035    |



**(R,Z)-methyl 2-(butyryloxy)-5-nitro-4-phenylpent-2-enoate (3ab)**

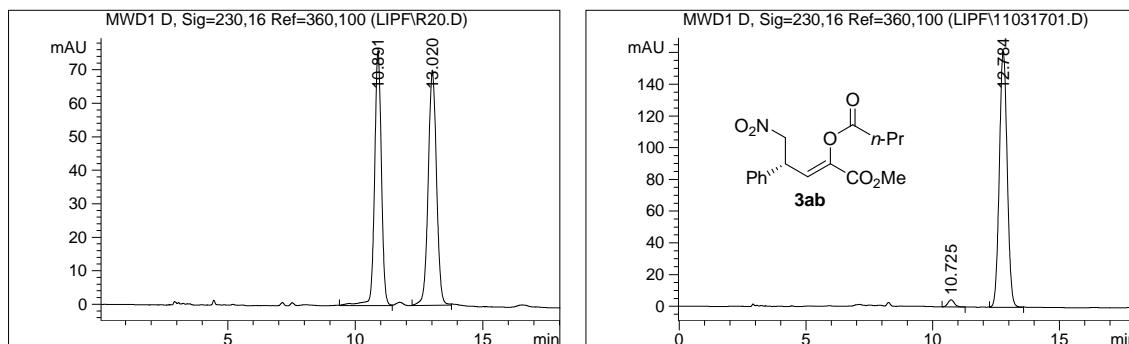

| Racemic adduct |        |        |        |        |        |          | Chiral adduct |        |        |        |        |        |          |
|----------------|--------|--------|--------|--------|--------|----------|---------------|--------|--------|--------|--------|--------|----------|
| #              | Time   | Area   | Height | Width  | Area%  | Symmetry | #             | Time   | Area   | Height | Width  | Area%  | Symmetry |
| 1              | 10.891 | 1420.1 | 76     | 0.2879 | 47.136 | 1.034    | 1             | 10.725 | 78.4   | 4.5    | 0.2752 | 2.207  | 0.89     |
| 2              | 13.02  | 1592.6 | 70.2   | 0.3528 | 52.864 | 0.979    | 2             | 12.784 | 3474.4 | 161.6  | 0.3348 | 97.793 | 0.936    |

**(R,Z)-ethyl 2-(butyryloxy)-5-nitro-4-phenylpent-2-enoate (3bb)**

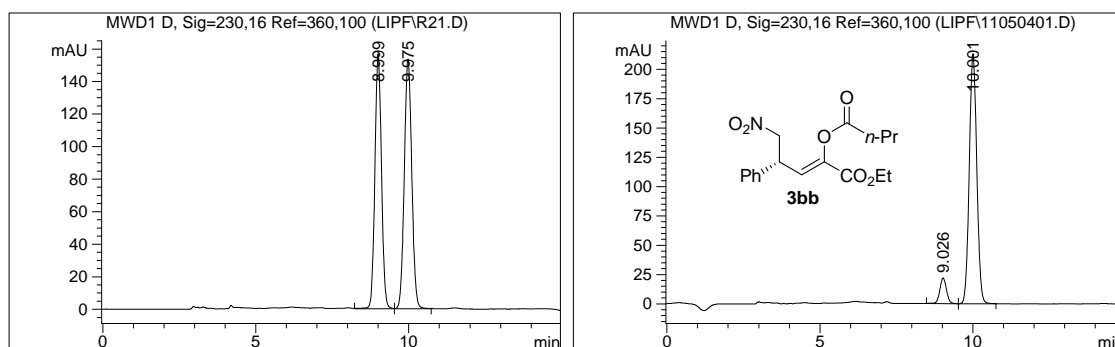

| Racemic adduct |       |        |        |       |        |          | Chiral adduct |        |        |        |        |        |          |
|----------------|-------|--------|--------|-------|--------|----------|---------------|--------|--------|--------|--------|--------|----------|
| #              | Time  | Area   | Height | Width | Area%  | Symmetry | #             | Time   | Area   | Height | Width  | Area%  | Symmetry |
| 1              | 8.999 | 2351.9 | 156.8  | 0.233 | 47.448 | 0.946    | 1             | 9.026  | 332.1  | 21.8   | 0.2355 | 8.364  | 0.979    |
| 2              | 9.975 | 2604.9 | 153.5  | 0.266 | 52.552 | 0.939    | 2             | 10.001 | 3637.9 | 213.2  | 0.267  | 91.636 | 0.932    |

**(R,Z)-ethyl 2-(butyryloxy)-4-(3-chlorophenyl)-5-nitropent-2-enoate (3fb)**

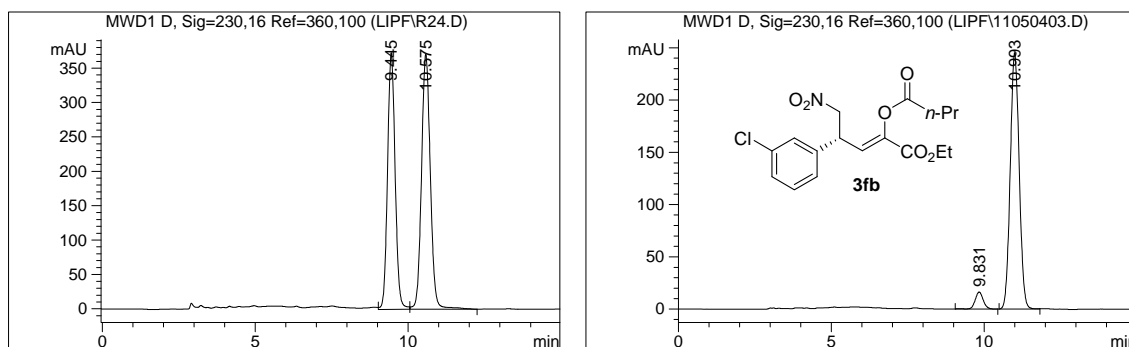

| Racemic adduct |        |        |        |        |        |          | Chiral adduct |        |       |        |        |        |          |
|----------------|--------|--------|--------|--------|--------|----------|---------------|--------|-------|--------|--------|--------|----------|
| #              | Time   | Area   | Height | Width  | Area%  | Symmetry | #             | Time   | Area  | Height | Width  | Area%  | Symmetry |
| 1              | 9.445  | 6463.4 | 373.4  | 0.2679 | 46.325 | 0.888    | 1             | 9.831  | 297.4 | 16.3   | 0.2812 | 5.641  | 0.947    |
| 2              | 10.575 | 7488.8 | 371    | 0.3115 | 53.675 | 0.885    | 2             | 10.993 | 4975  | 245.3  | 0.3166 | 94.359 | 0.934    |

**(R,Z)-ethyl 4-(3-bromophenyl)-2-(butyryloxy)-5-nitro-2-enoate (3gb)**

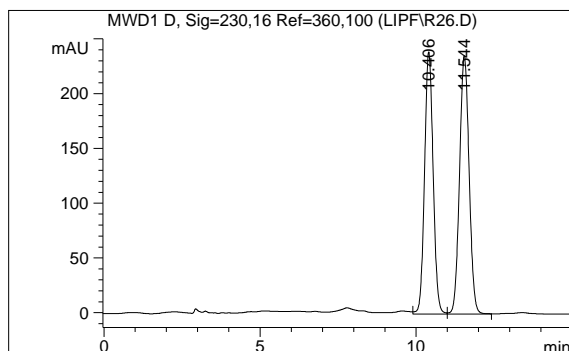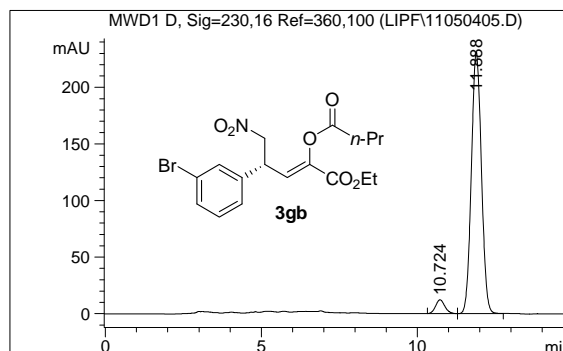

| Racemic adduct |        |        |        |        |        |          | Chiral adduct |        |        |        |        |        |          |
|----------------|--------|--------|--------|--------|--------|----------|---------------|--------|--------|--------|--------|--------|----------|
| #              | Time   | Area   | Height | Width  | Area%  | Symmetry | #             | Time   | Area   | Height | Width  | Area%  | Symmetry |
| 1              | 10.406 | 4578.1 | 239.5  | 0.297  | 47.606 | 0.924    | 1             | 10.724 | 253.5  | 12.2   | 0.3215 | 4.676  | 0.877    |
| 2              | 11.544 | 5038.5 | 236    | 0.3331 | 52.394 | 0.943    | 2             | 11.888 | 5166.8 | 231.3  | 0.3487 | 95.324 | 0.935    |

**(R,Z)-ethyl 2-(butyryloxy)-5-nitro-4-(3-nitrophenyl)pent-2-enoate (3ib)**

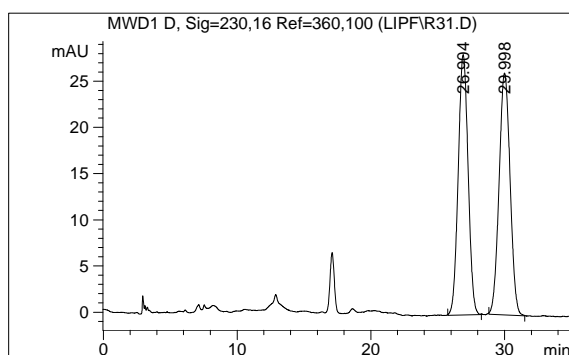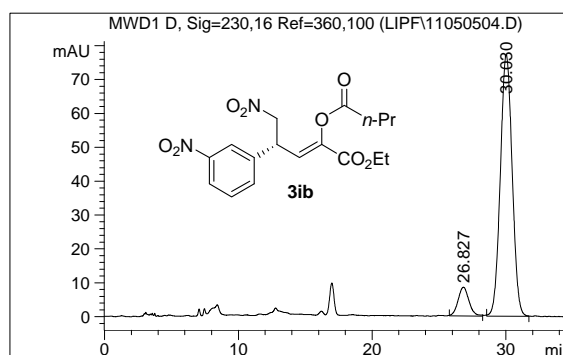

| Racemic adduct |        |        |        |        |        |          | Chiral adduct |        |        |        |        |        |          |
|----------------|--------|--------|--------|--------|--------|----------|---------------|--------|--------|--------|--------|--------|----------|
| #              | Time   | Area   | Height | Width  | Area%  | Symmetry | #             | Time   | Area   | Height | Width  | Area%  | Symmetry |
| 1              | 26.904 | 1446.3 | 28.2   | 0.8004 | 49.187 | 0.963    | 1             | 26.827 | 477.4  | 8.5    | 0.829  | 9.150  | 0.915    |
| 2              | 29.998 | 1494.1 | 26.2   | 0.8537 | 50.813 | 0.956    | 2             | 30.03  | 4739.6 | 77.2   | 0.9498 | 90.850 | 0.965    |

**(R,Z)-ethyl 2-(butyryloxy)-4-(3-methoxyphenyl)-5-nitropent-2-enoate (3kb)**

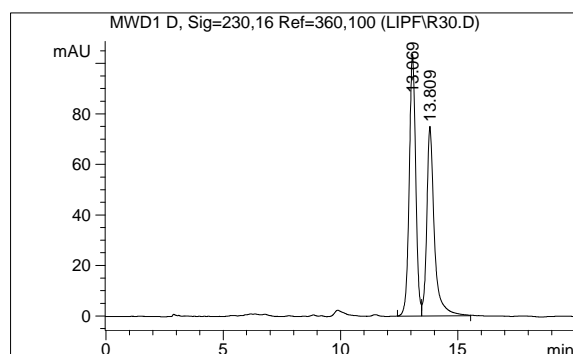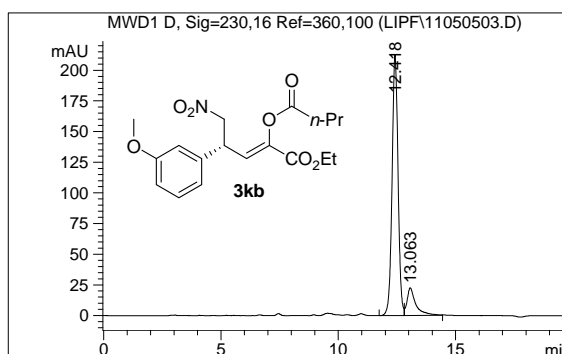

| Racemic adduct |        |        |        |        |        |          | Chiral adduct |        |        |        |        |        |          |
|----------------|--------|--------|--------|--------|--------|----------|---------------|--------|--------|--------|--------|--------|----------|
| #              | Time   | Area   | Height | Width  | Area%  | Symmetry | #             | Time   | Area   | Height | Width  | Area%  | Symmetry |
| 1              | 13.069 | 1988.3 | 103.6  | 0.2959 | 54.089 | 0.996    | 1             | 12.418 | 3765.5 | 213    | 0.2723 | 86.549 | 0.975    |
| 2              | 13.809 | 1687.7 | 75.1   | 0.3303 | 45.911 | 0.636    | 2             | 13.063 | 585.2  | 22.6   | 0.3666 | 13.451 | 0.497    |

**(R,Z)-ethyl 2-(butyryloxy)-4-(4-fluorophenyl)-5-nitropent-2-enoate (3lb)**

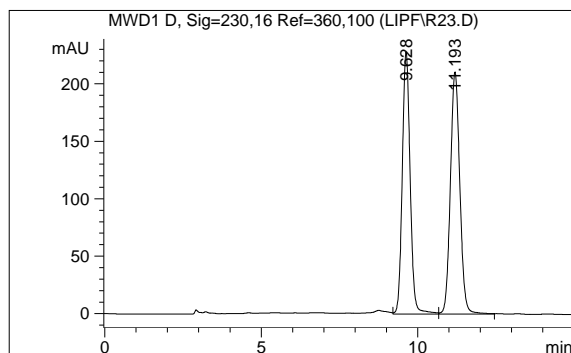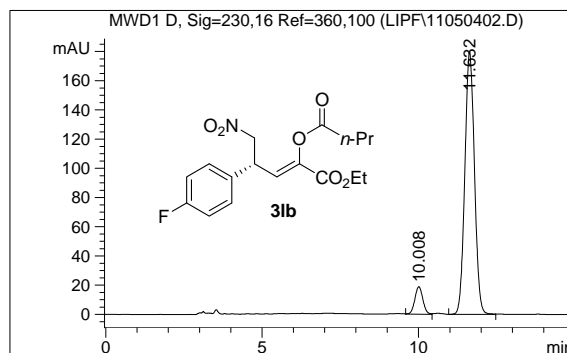

| Racemic adduct |        |        |        |        |        |          | Chiral adduct |        |        |        |        |        |          |
|----------------|--------|--------|--------|--------|--------|----------|---------------|--------|--------|--------|--------|--------|----------|
| #              | Time   | Area   | Height | Width  | Area%  | Symmetry | #             | Time   | Area   | Height | Width  | Area%  | Symmetry |
| 1              | 9.628  | 3999.6 | 228.1  | 0.2706 | 47.604 | 0.868    | 1             | 10.008 | 332.9  | 18.8   | 0.2767 | 7.991  | 0.954    |
| 2              | 11.193 | 4402.1 | 210.6  | 0.3258 | 52.396 | 0.902    | 2             | 11.632 | 3833.1 | 179.7  | 0.3329 | 92.009 | 0.94     |

**(R,Z)-ethyl 2-(butyryloxy)-4-(4-chlorophenyl)-5-nitropent-2-enoate (3mb)**

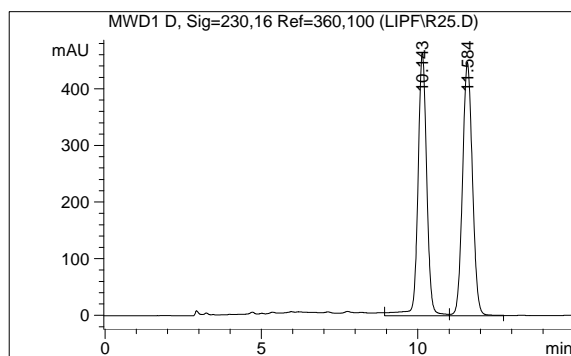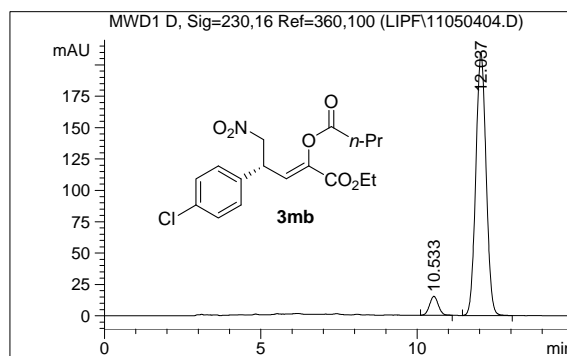

| Racemic adduct |        |        |        |        |        |          | Chiral adduct |        |        |        |        |        |          |
|----------------|--------|--------|--------|--------|--------|----------|---------------|--------|--------|--------|--------|--------|----------|
| #              | Time   | Area   | Height | Width  | Area%  | Symmetry | #             | Time   | Area   | Height | Width  | Area%  | Symmetry |
| 1              | 10.143 | 9092.7 | 463.7  | 0.3028 | 48.024 | 0.983    | 1             | 10.533 | 295.7  | 15.1   | 0.3043 | 5.834  | 0.928    |
| 2              | 11.584 | 9841   | 447.3  | 0.3447 | 51.976 | 0.915    | 2             | 12.037 | 4773.9 | 209.1  | 0.3563 | 94.166 | 0.942    |

**(R,Z)-ethyl 4-(4-bromophenyl)-2-(butyryloxy)-5-nitropent-2-enoate (3nb)**

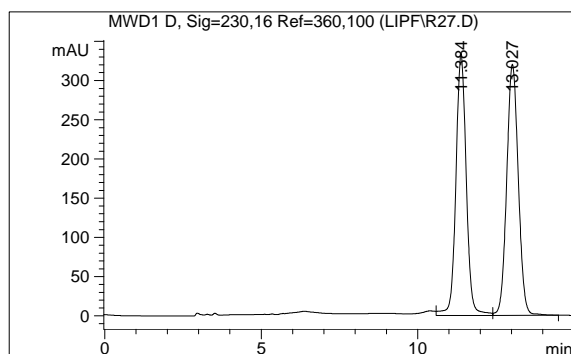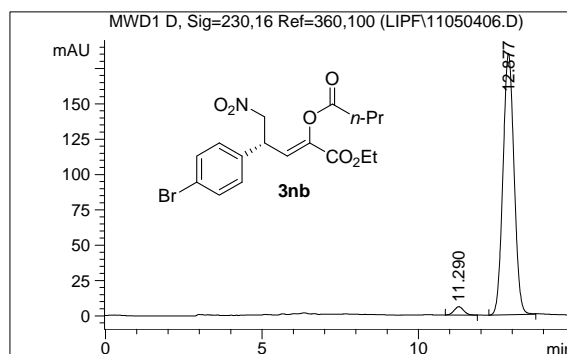

| Racemic adduct |        |        |        |        |        |          | Chiral adduct |        |        |        |        |        |          |
|----------------|--------|--------|--------|--------|--------|----------|---------------|--------|--------|--------|--------|--------|----------|
| #              | Time   | Area   | Height | Width  | Area%  | Symmetry | #             | Time   | Area   | Height | Width  | Area%  | Symmetry |
| 1              | 11.384 | 7736.5 | 334.3  | 0.358  | 48.381 | 0.936    | 1             | 11.29  | 126.3  | 5.8    | 0.3363 | 2.694  | 0.903    |
| 2              | 13.027 | 8254.4 | 320.3  | 0.4027 | 51.619 | 0.926    | 2             | 12.877 | 4561.9 | 184.9  | 0.3839 | 97.306 | 0.936    |

**(R,Z)-ethyl 2-(butyryloxy)-5-nitro-4-p-tolylpent-2-enoate (3pb)**

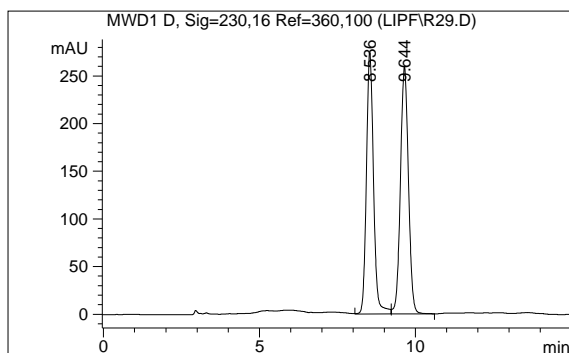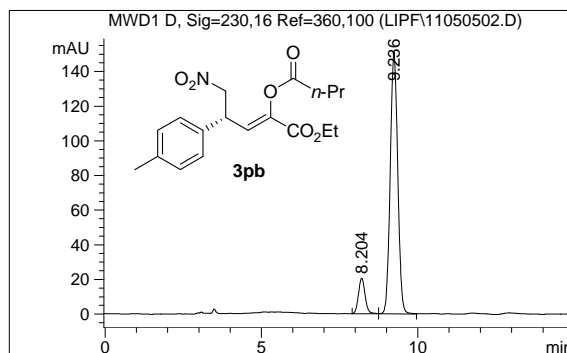

| Racemic adduct |       |        |        |        |        |          | Chiral adduct |       |        |        |       |        |          |
|----------------|-------|--------|--------|--------|--------|----------|---------------|-------|--------|--------|-------|--------|----------|
| #              | Time  | Area   | Height | Width  | Area%  | Symmetry | #             | Time  | Area   | Height | Width | Area%  | Symmetry |
| 1              | 8.536 | 4369.9 | 274.5  | 0.2457 | 48.486 | 0.841    | 1             | 8.204 | 304.1  | 20.6   | 0.228 | 10.731 | 0.877    |
| 2              | 9.644 | 4642.8 | 259.2  | 0.277  | 51.514 | 0.943    | 2             | 9.236 | 2529.3 | 151.3  | 0.261 | 89.269 | 0.935    |

F: Copies of  $^1\text{H}$ , and  $^{13}\text{C}$  NMR spectra of Adducts

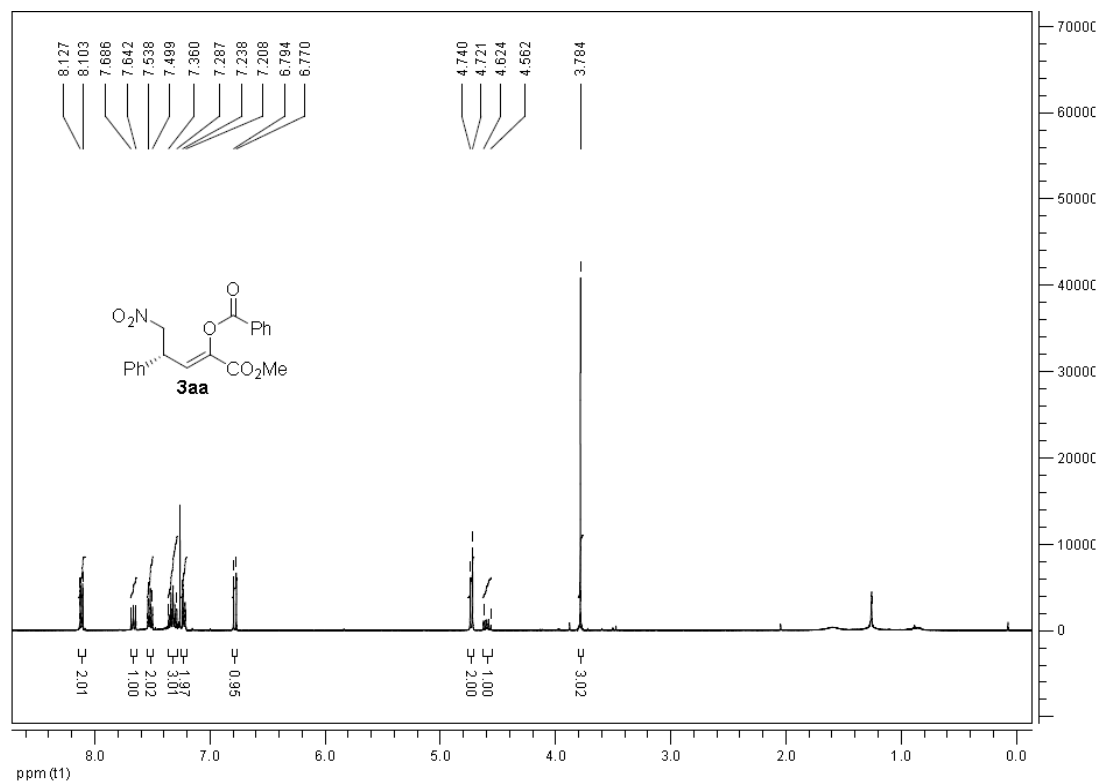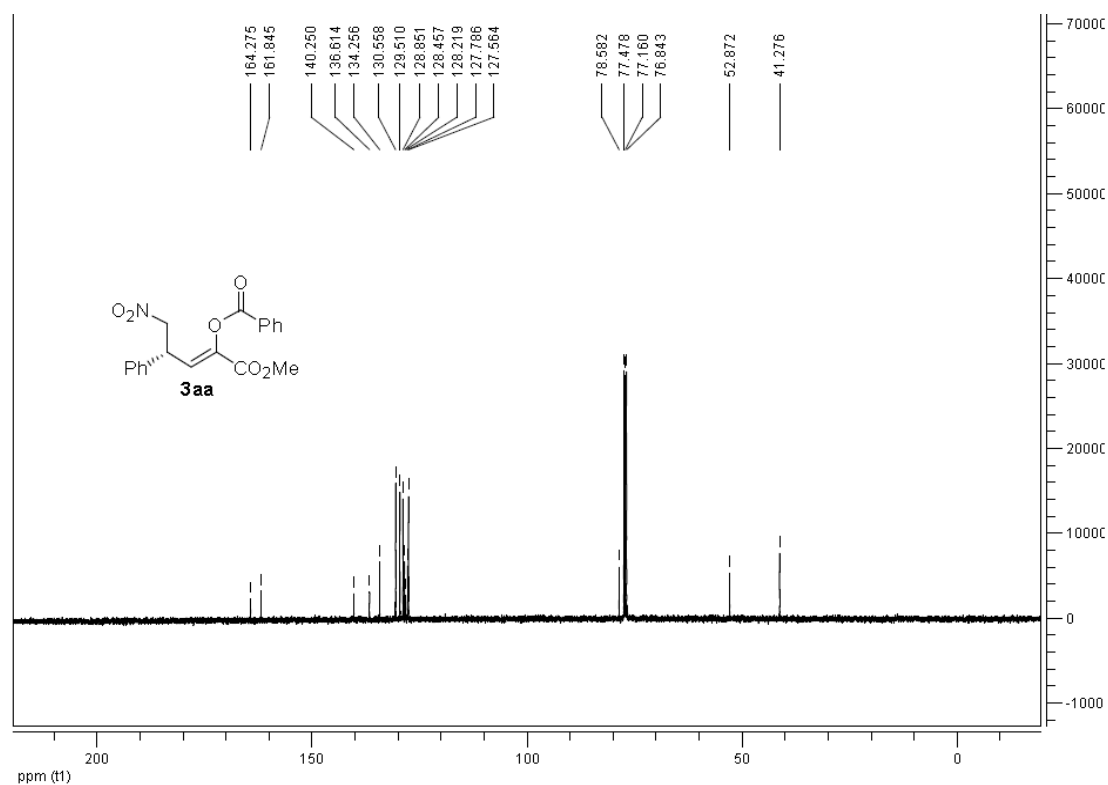

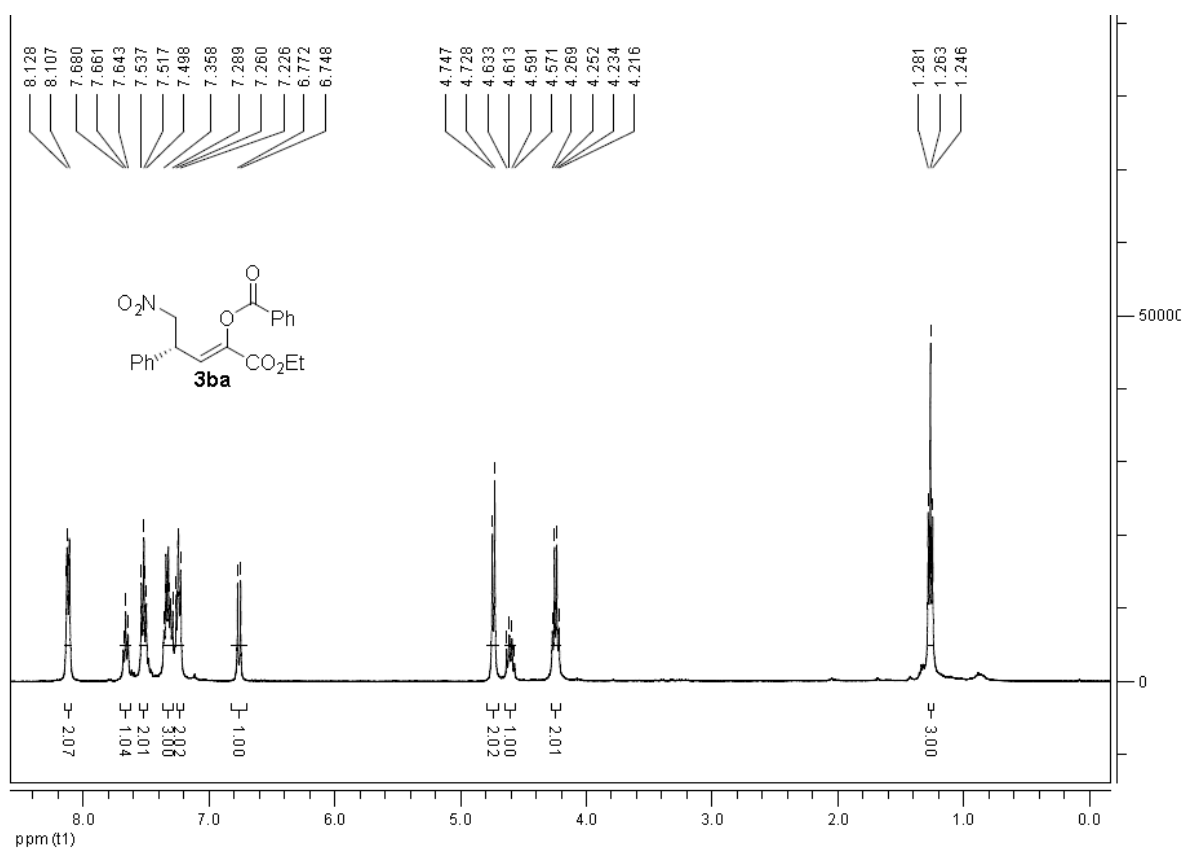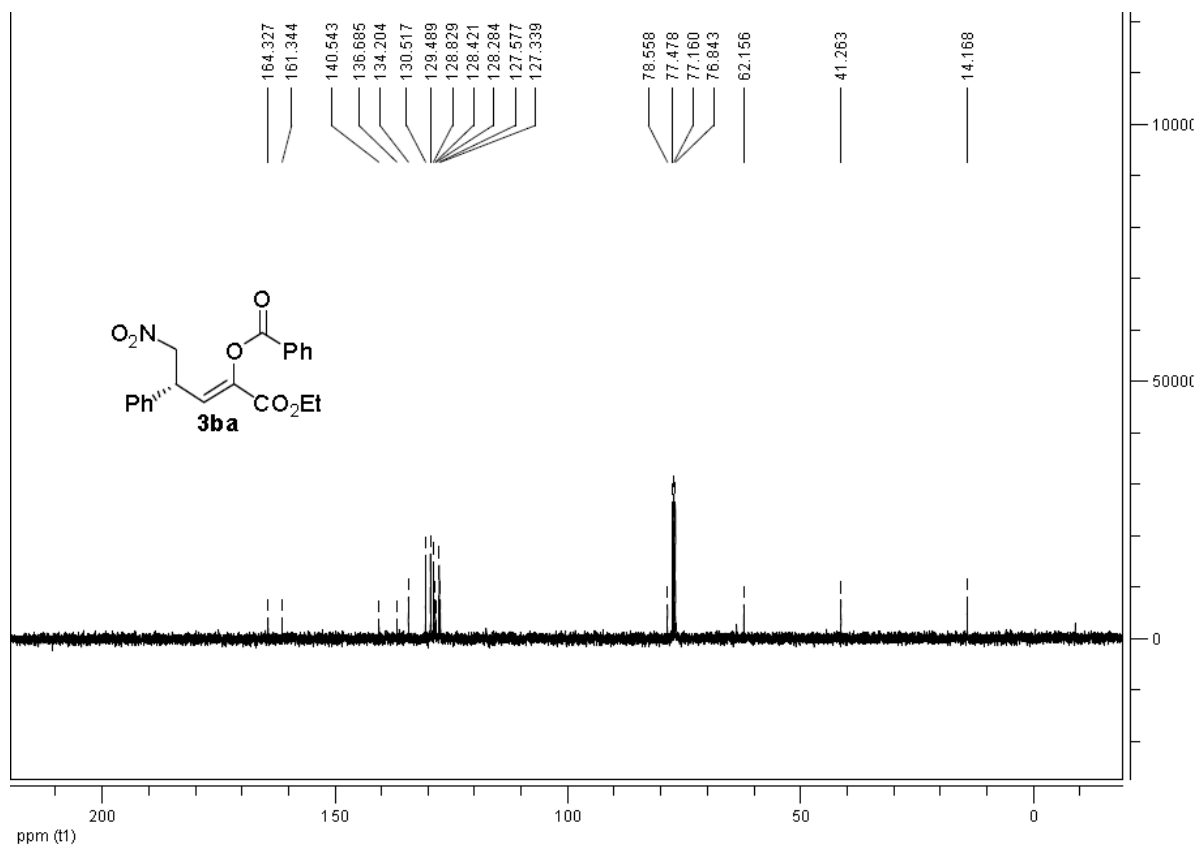

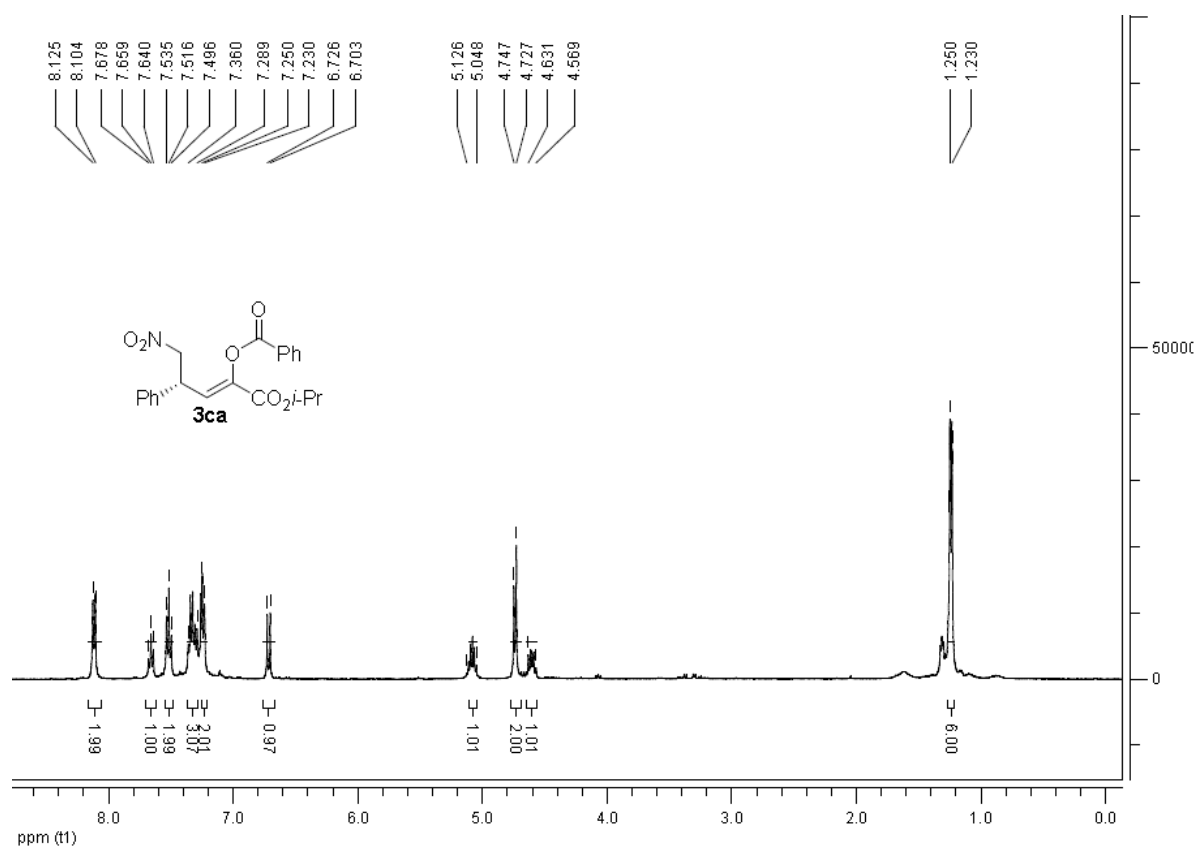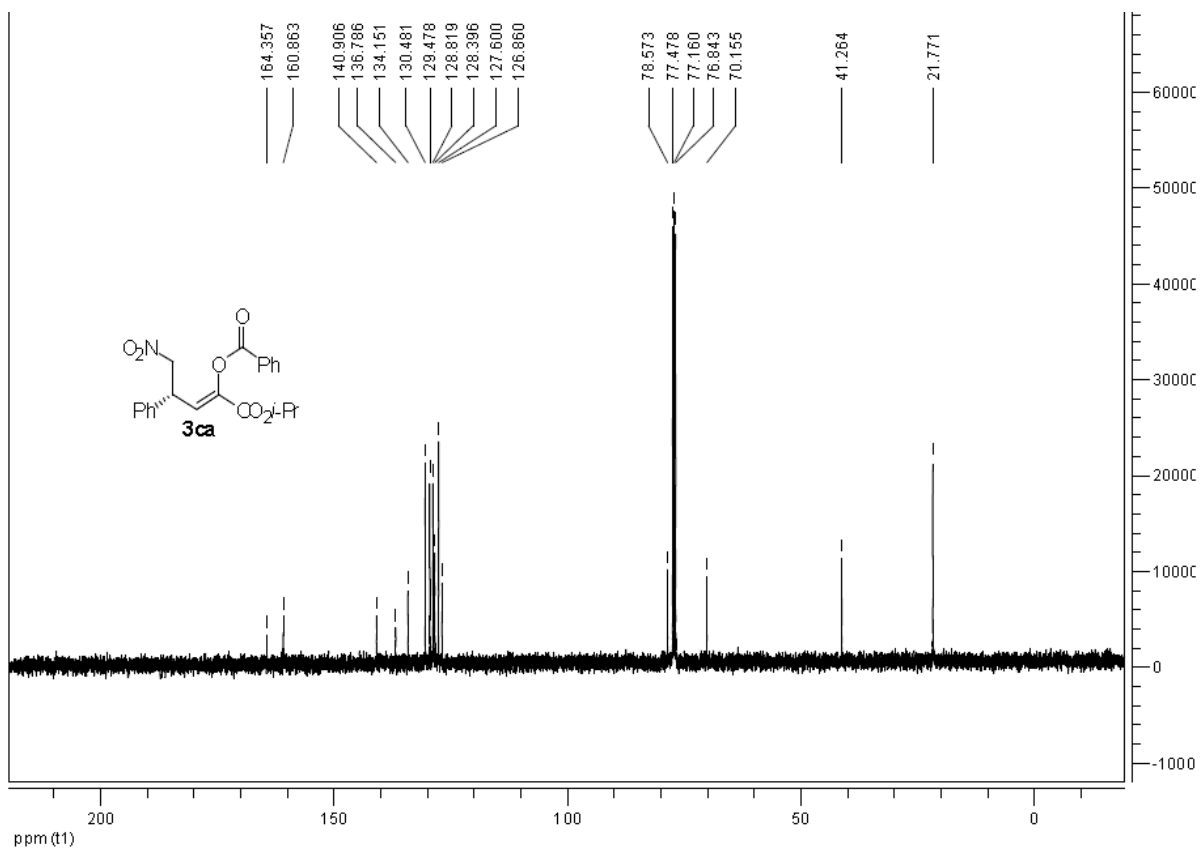

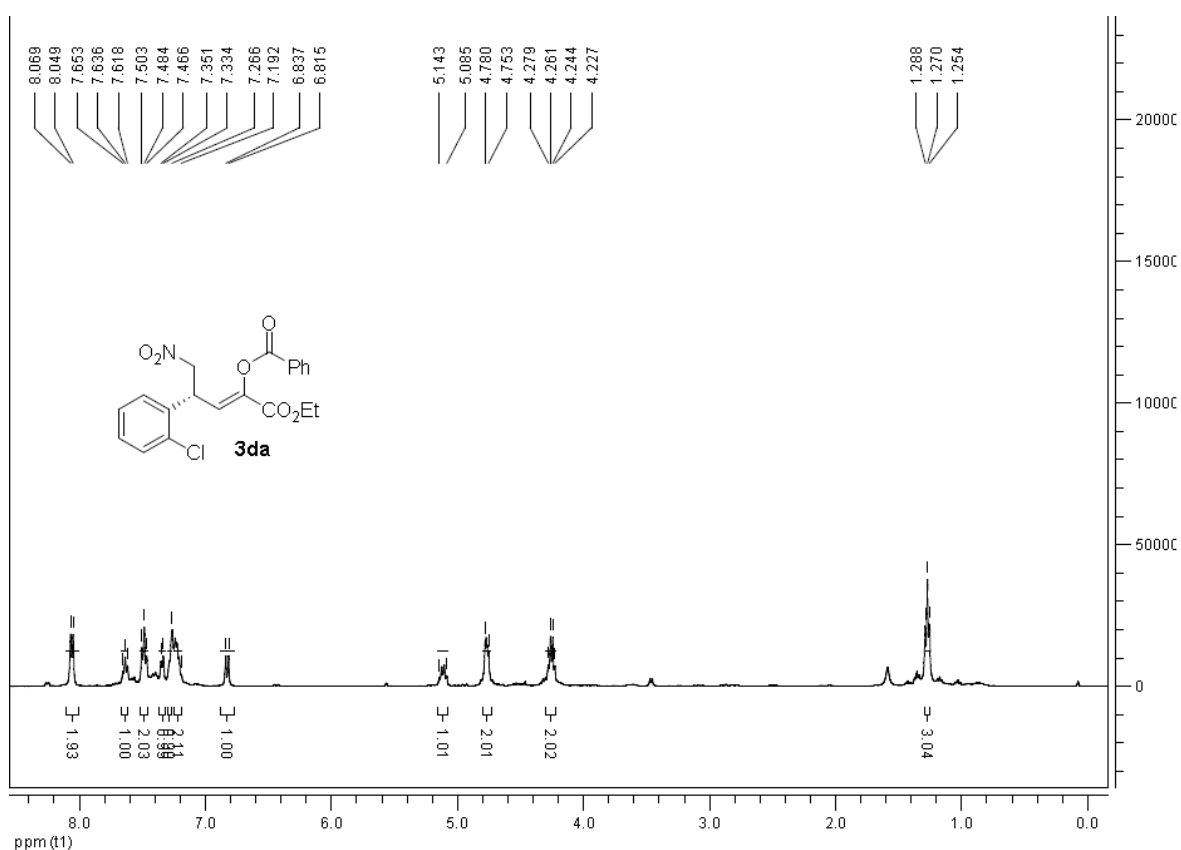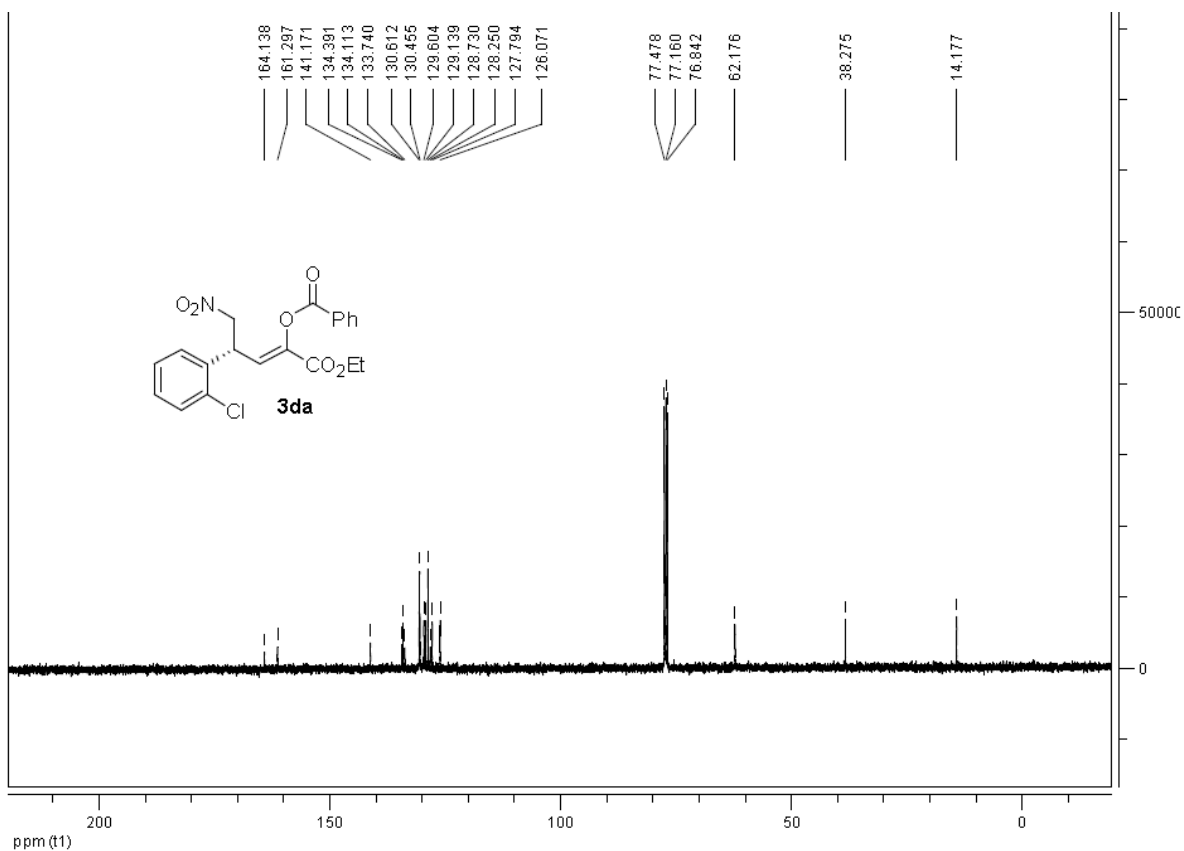



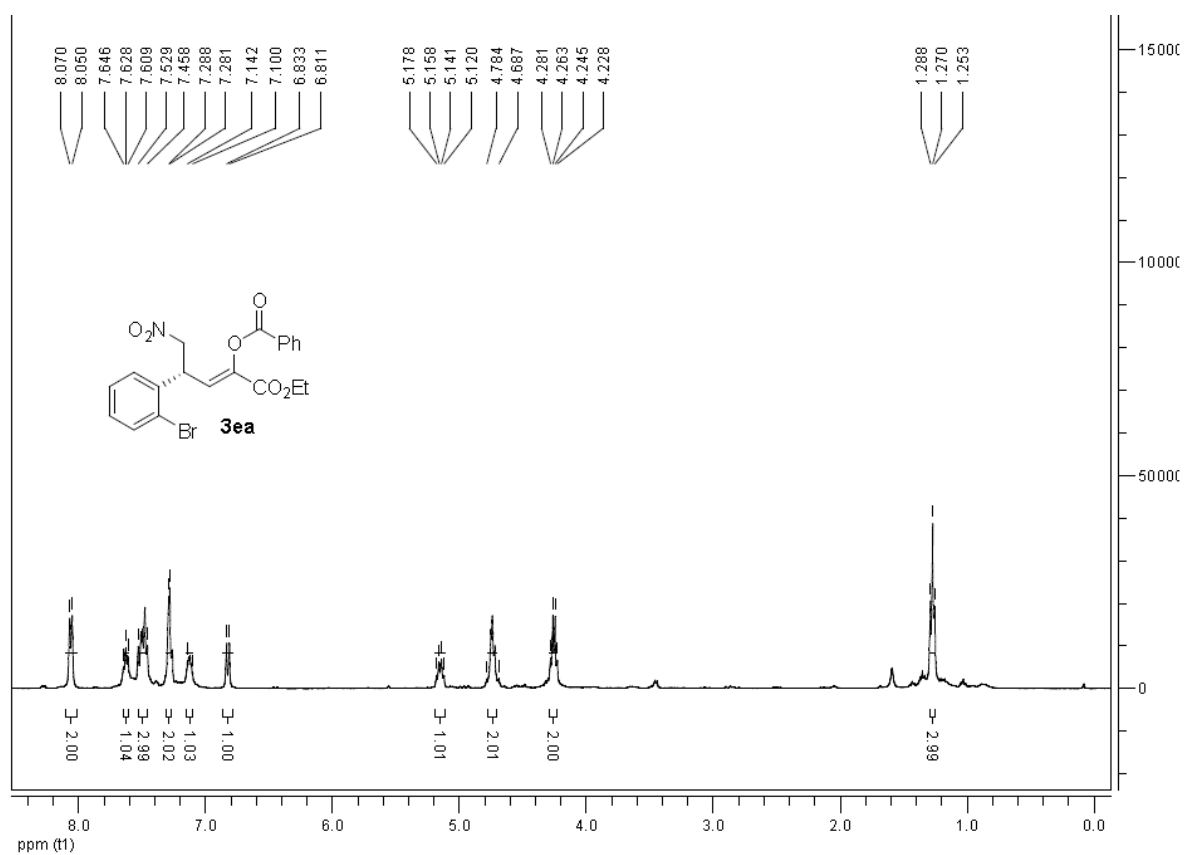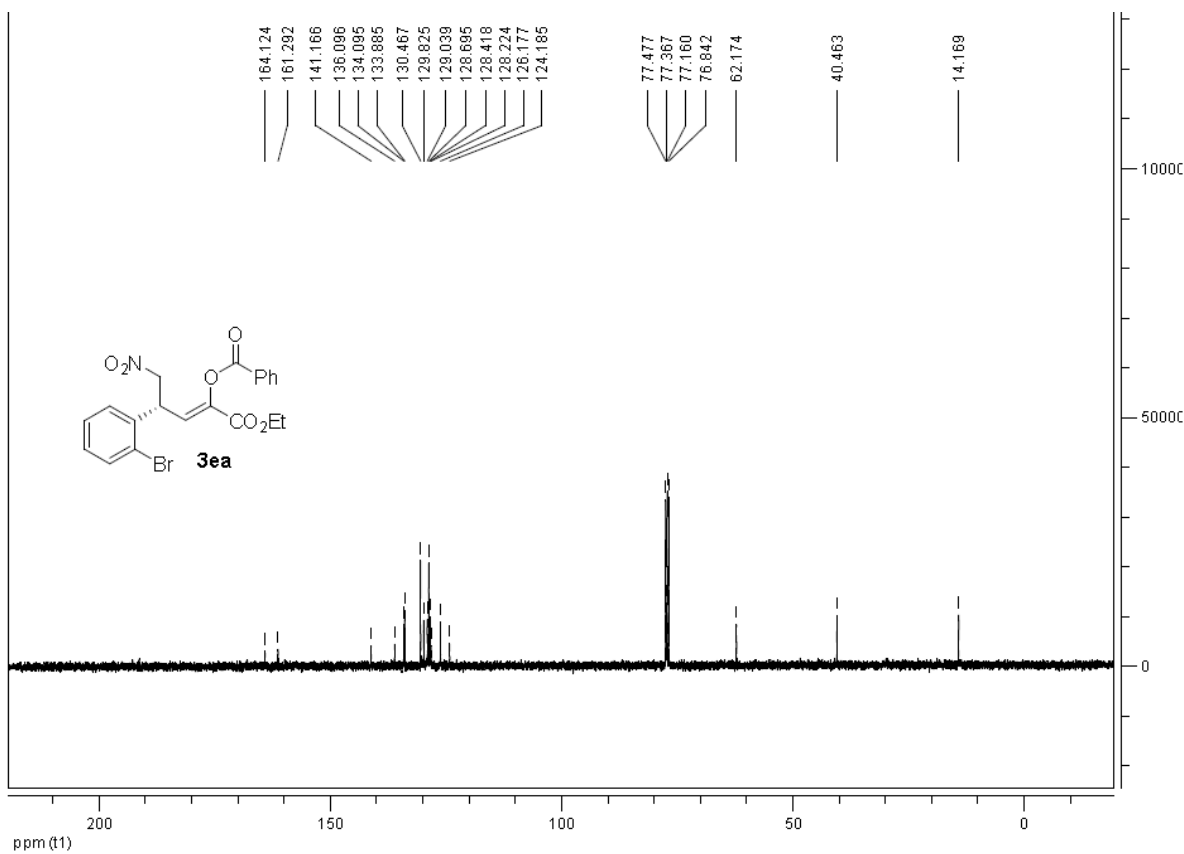

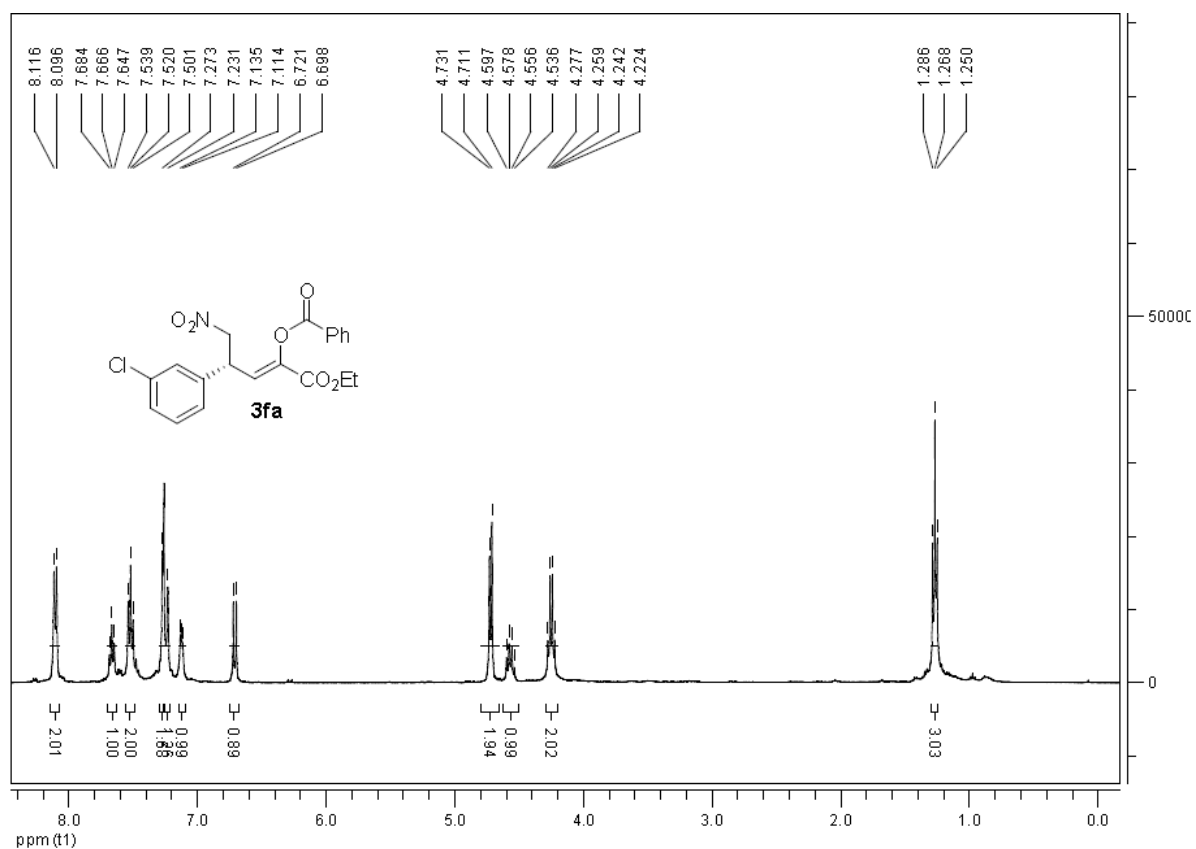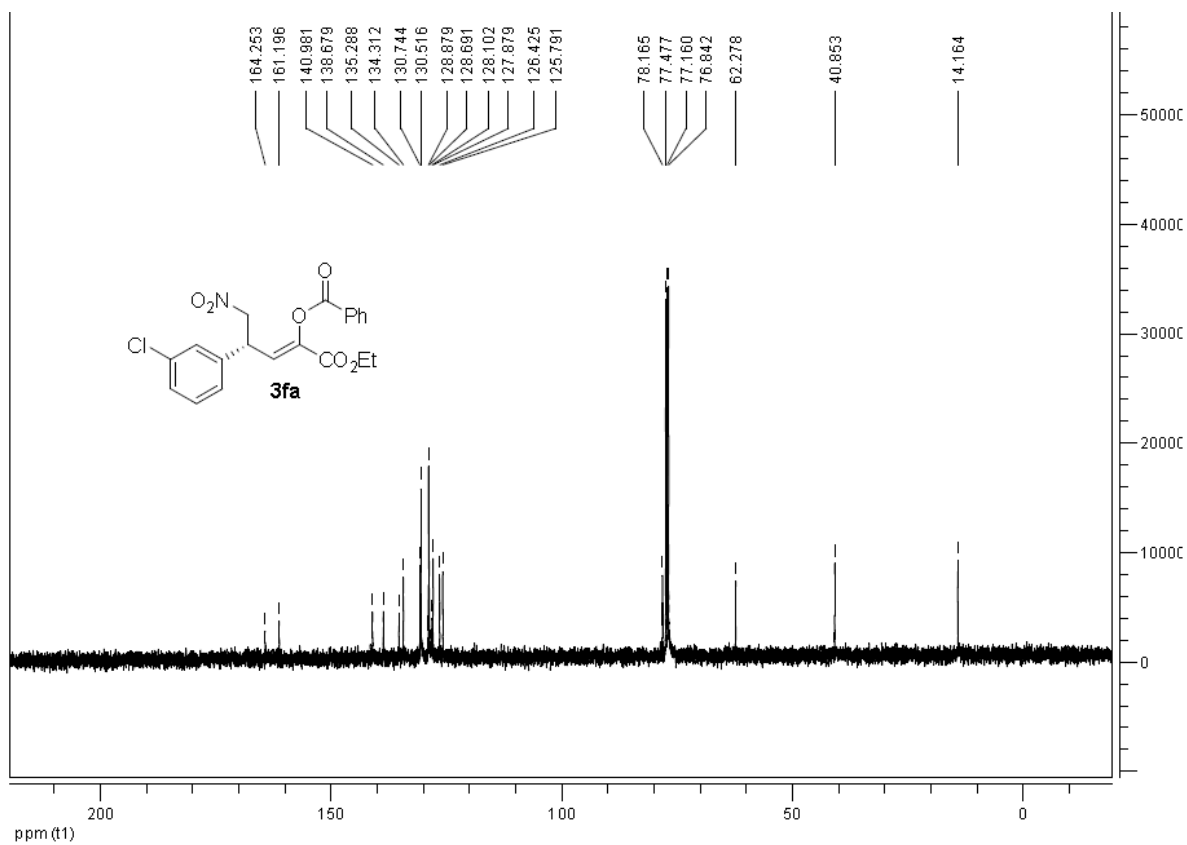

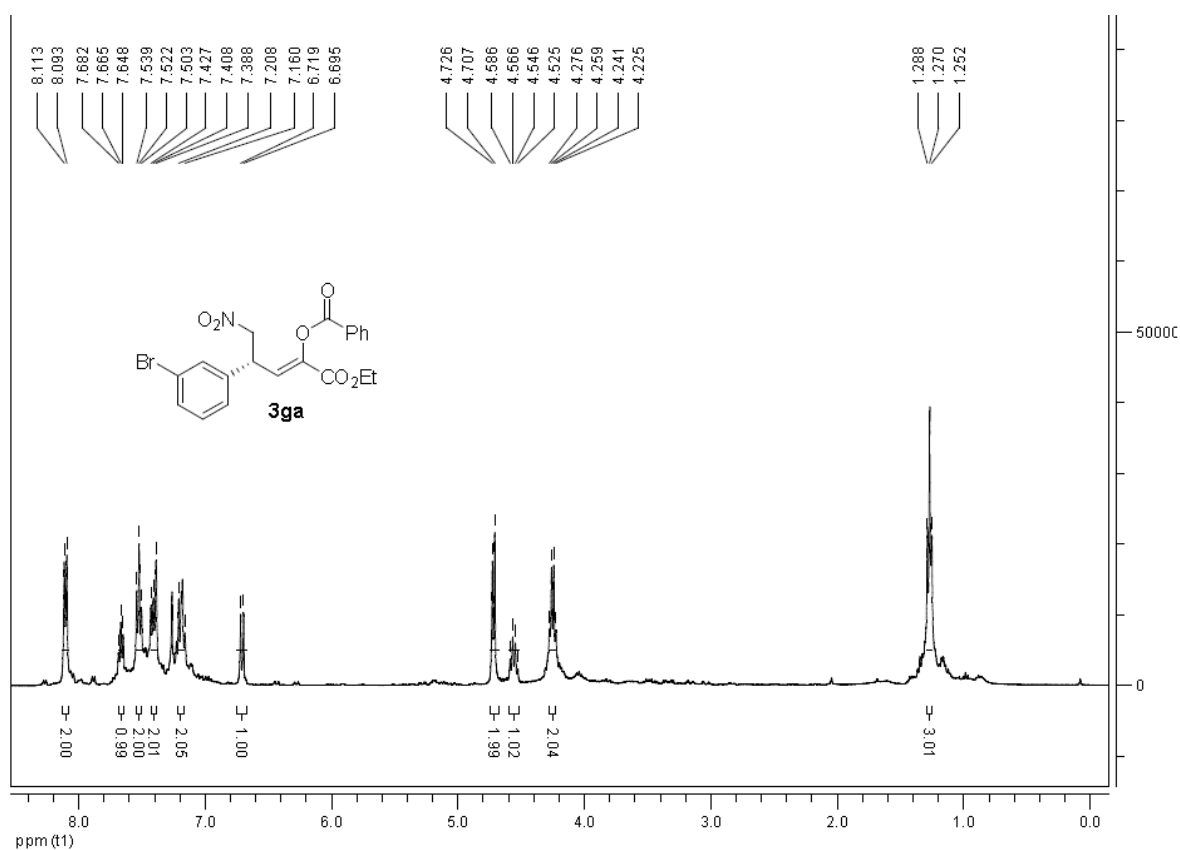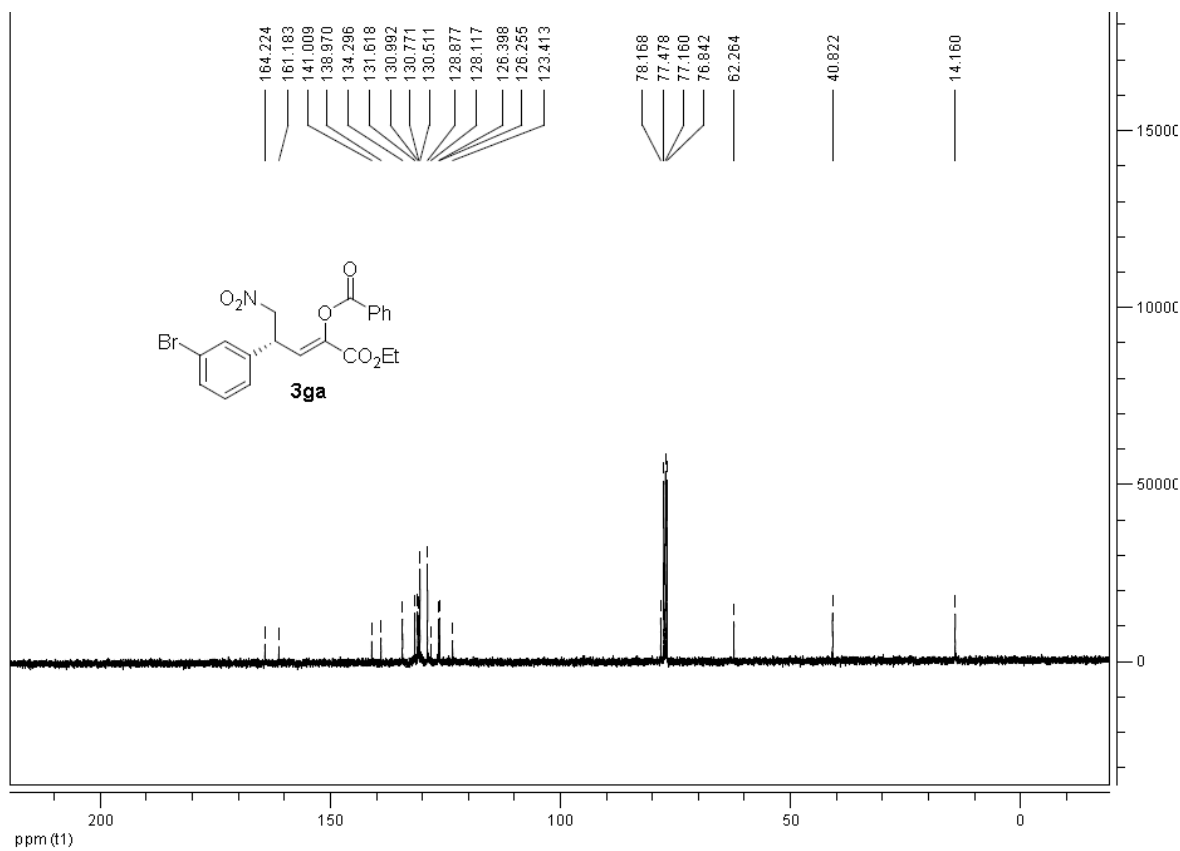

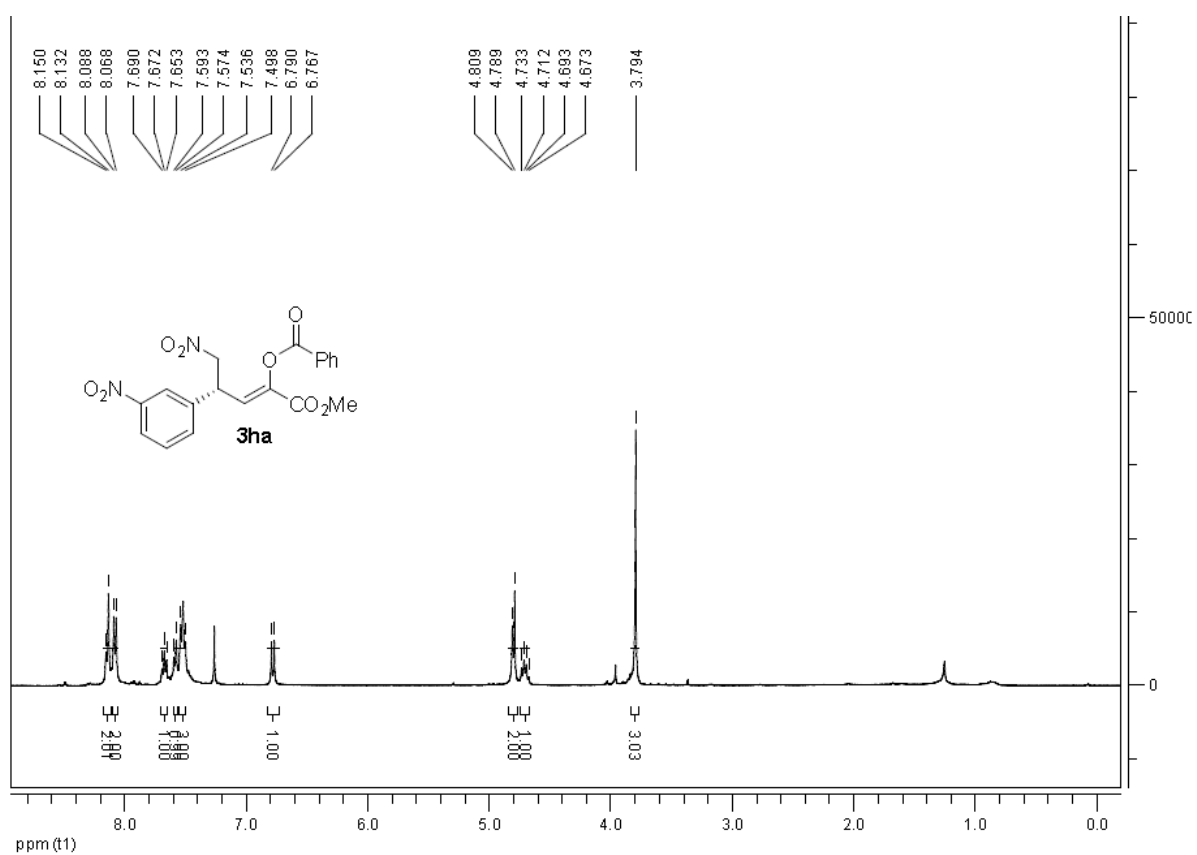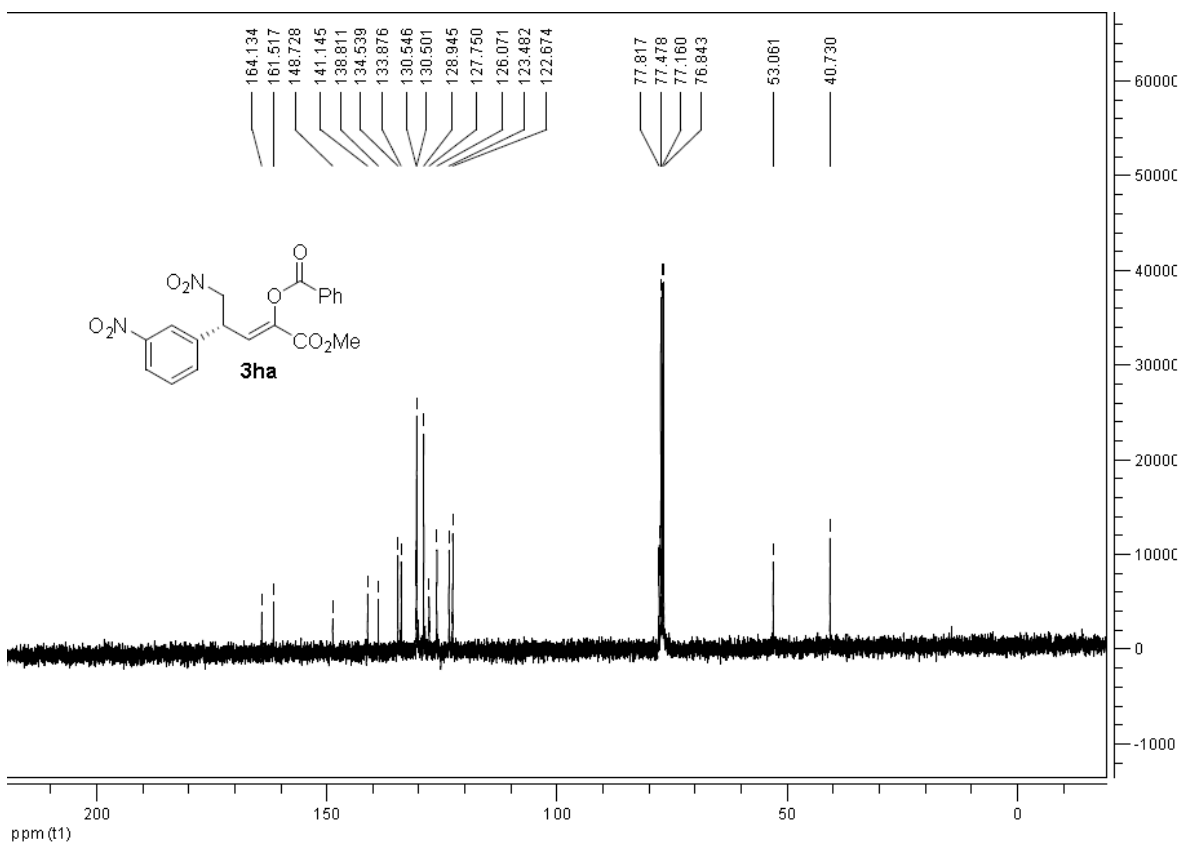

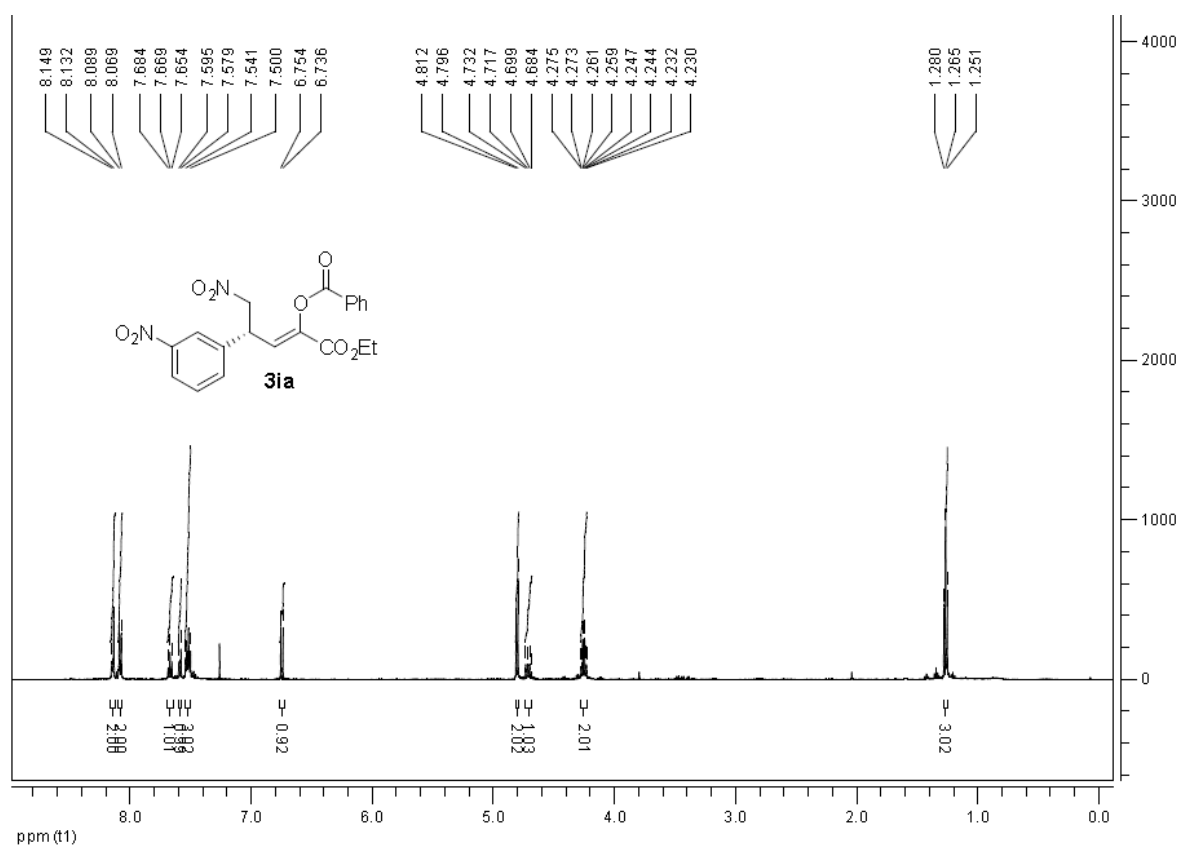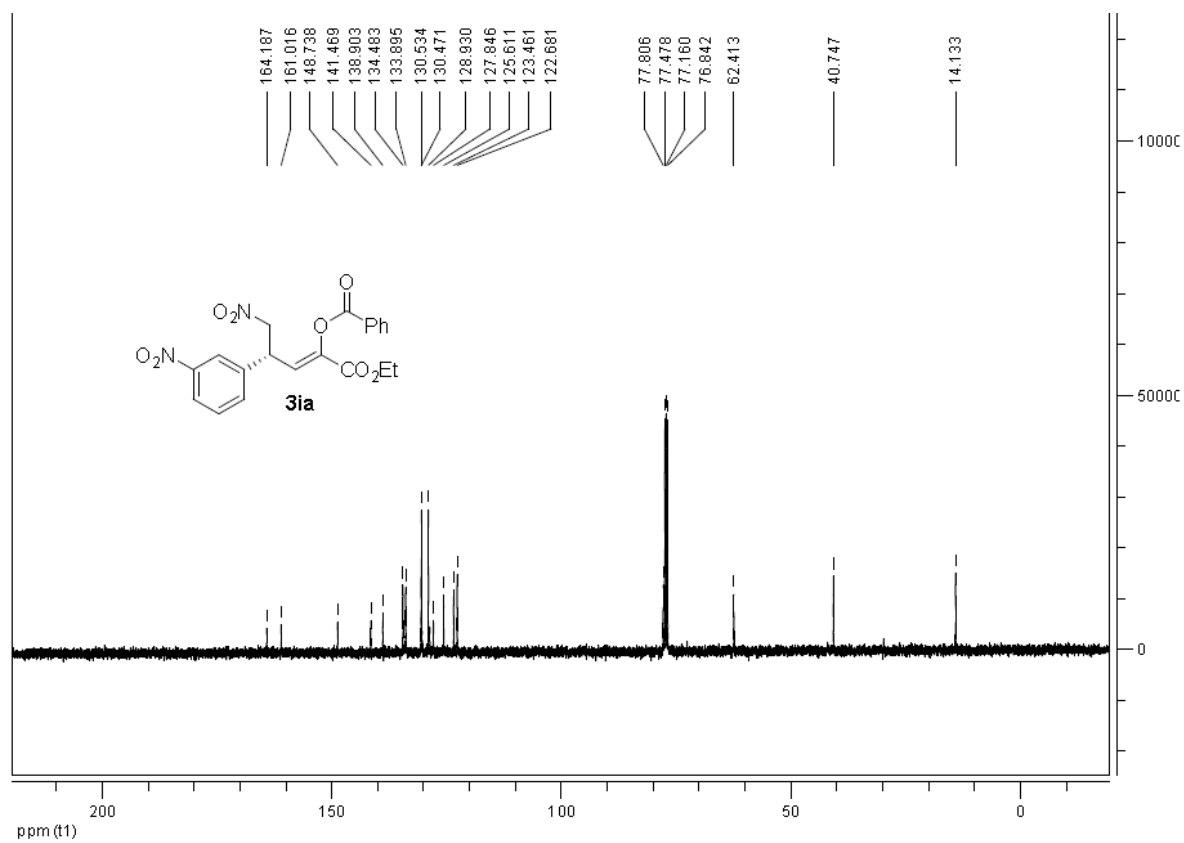

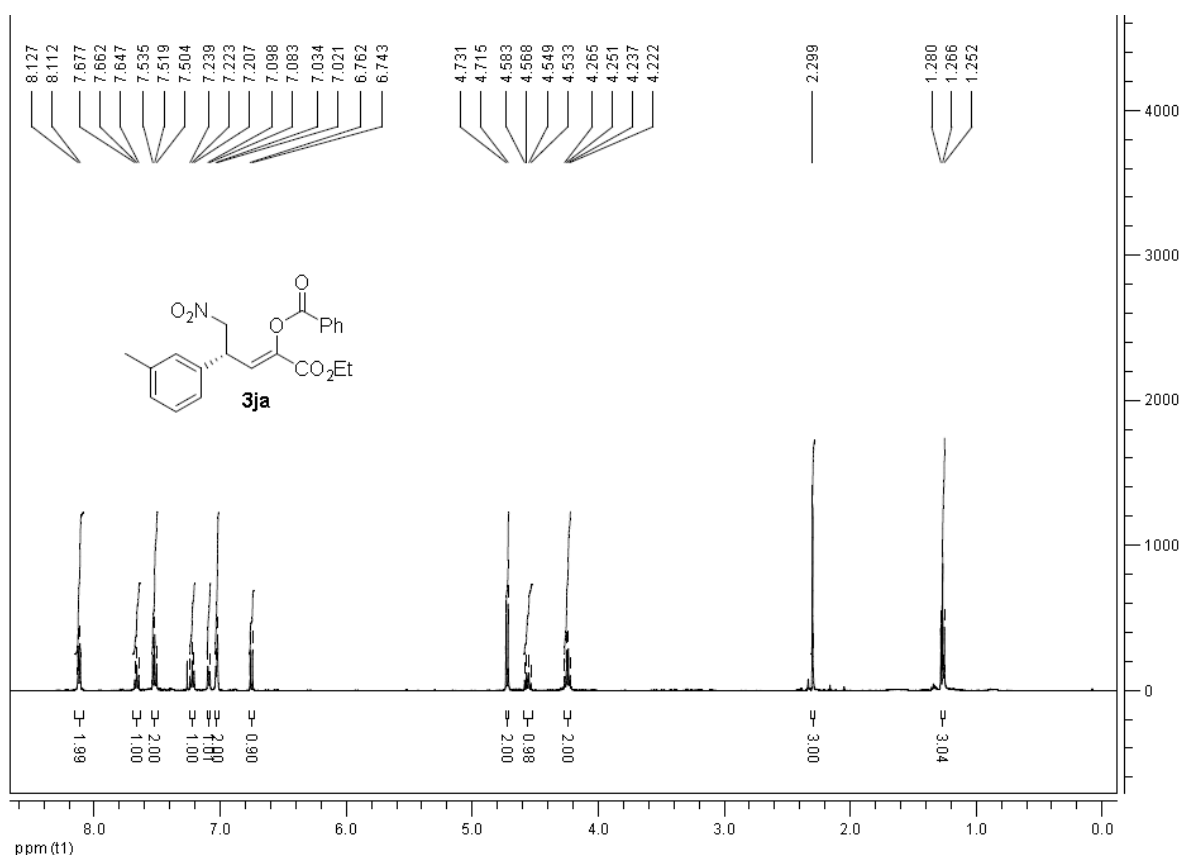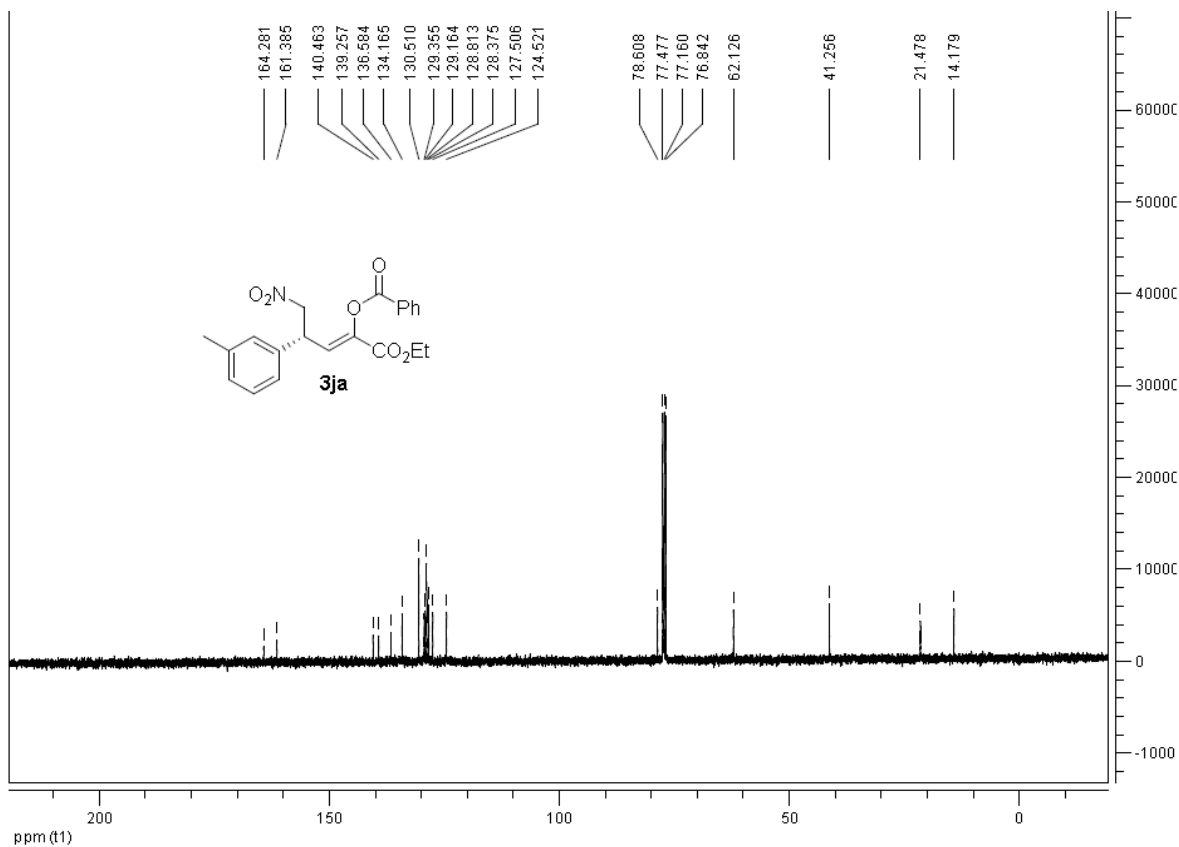

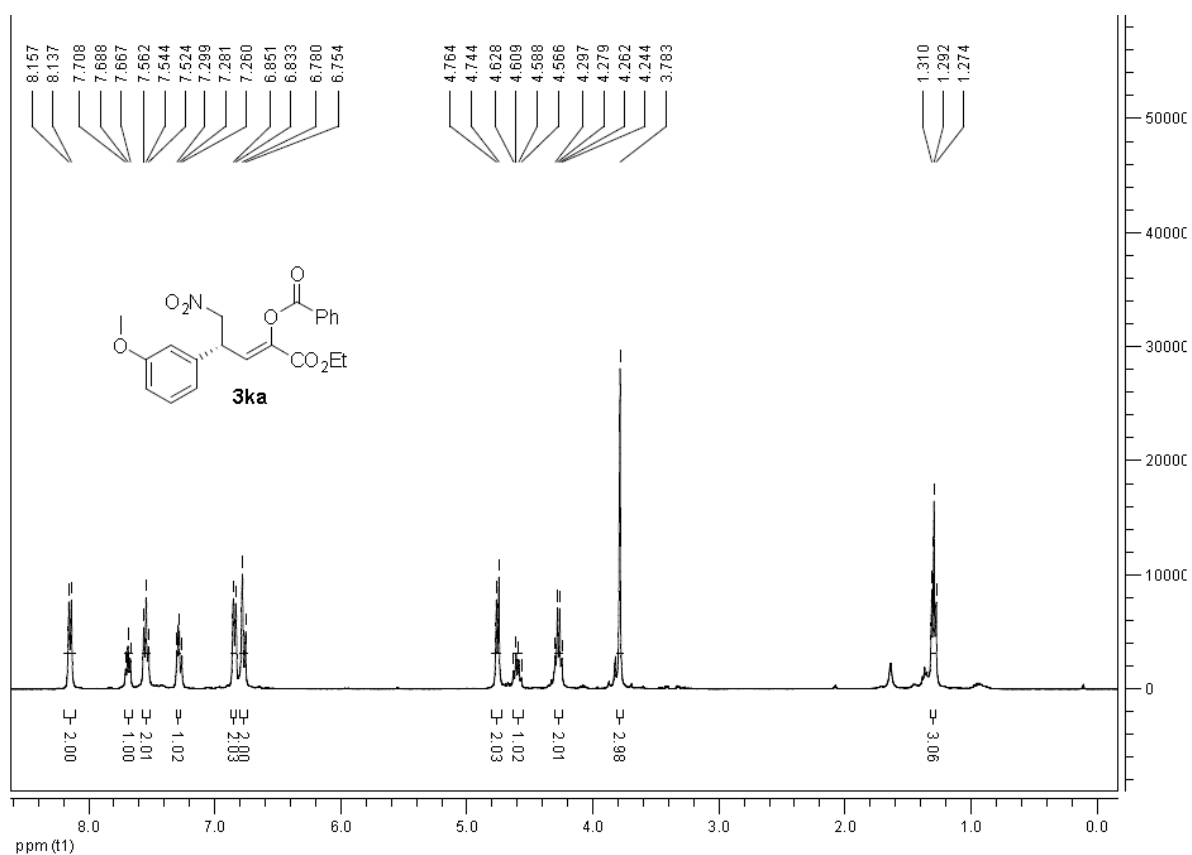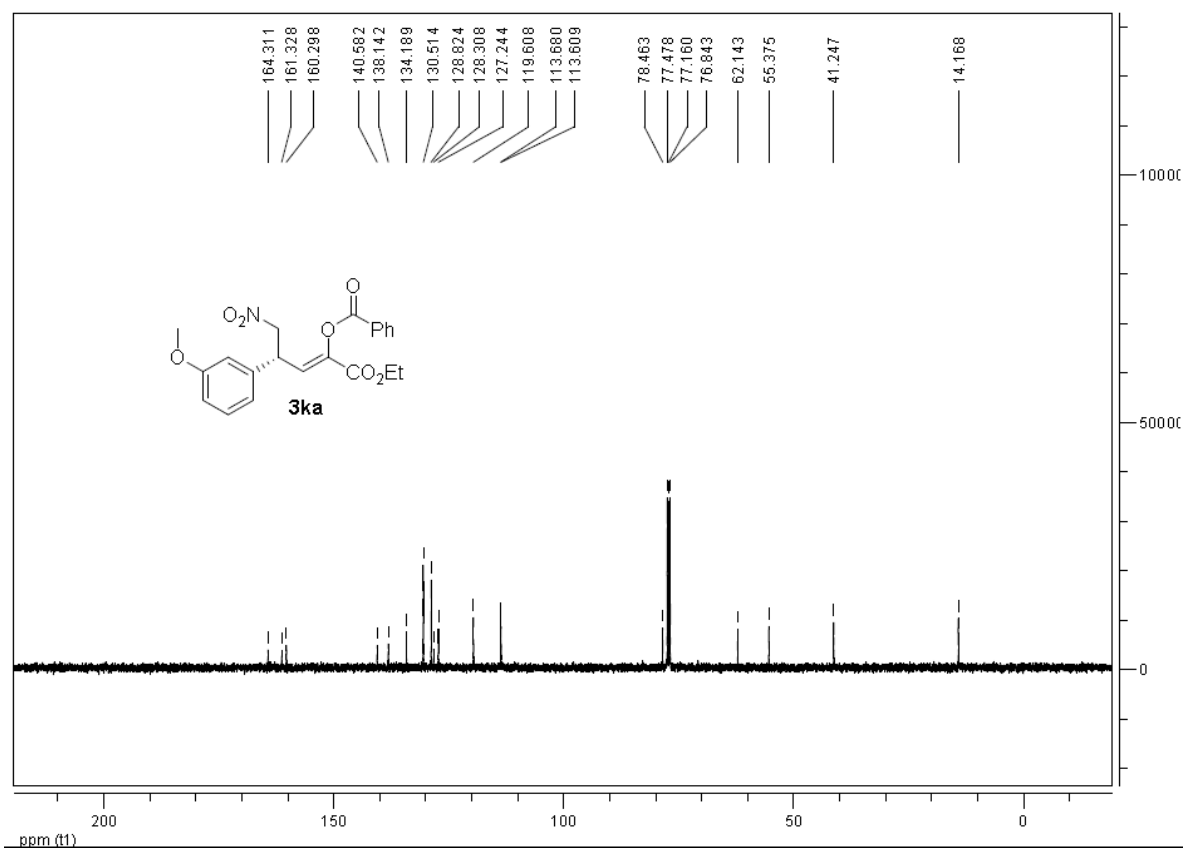

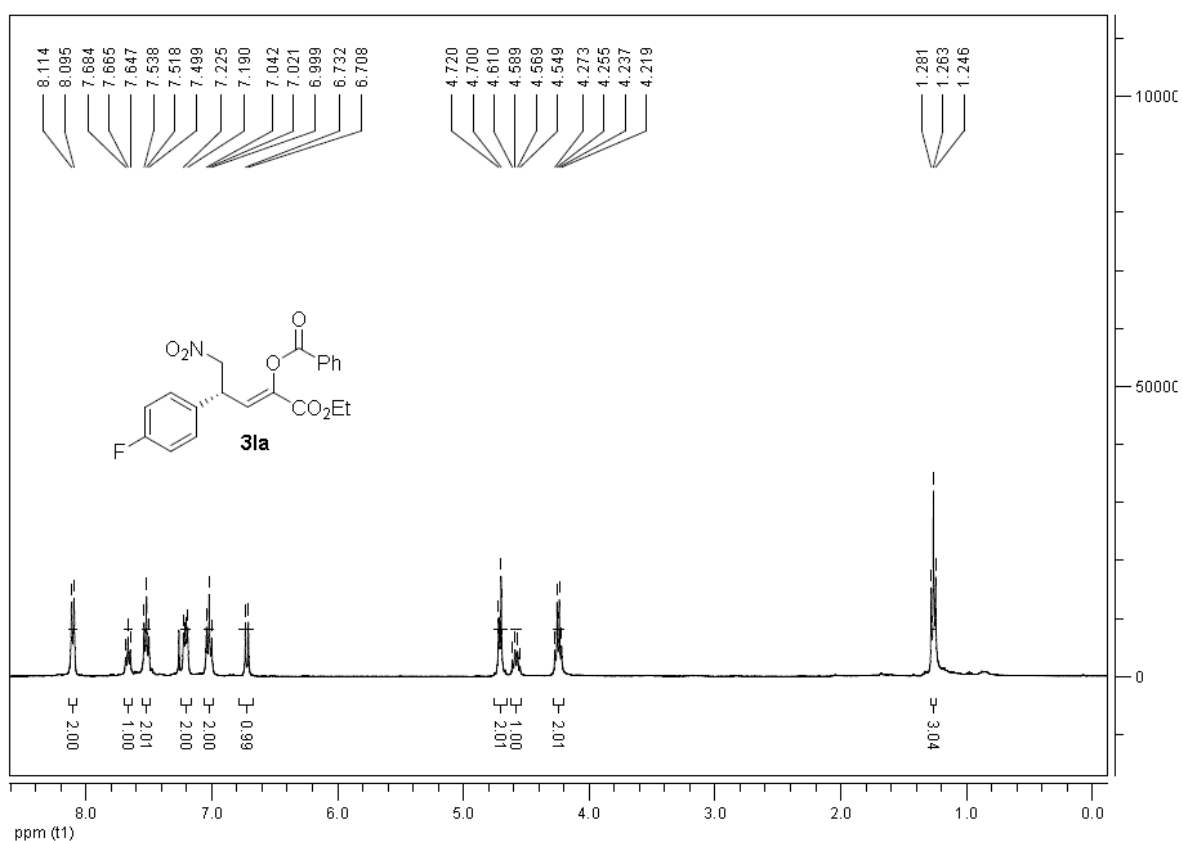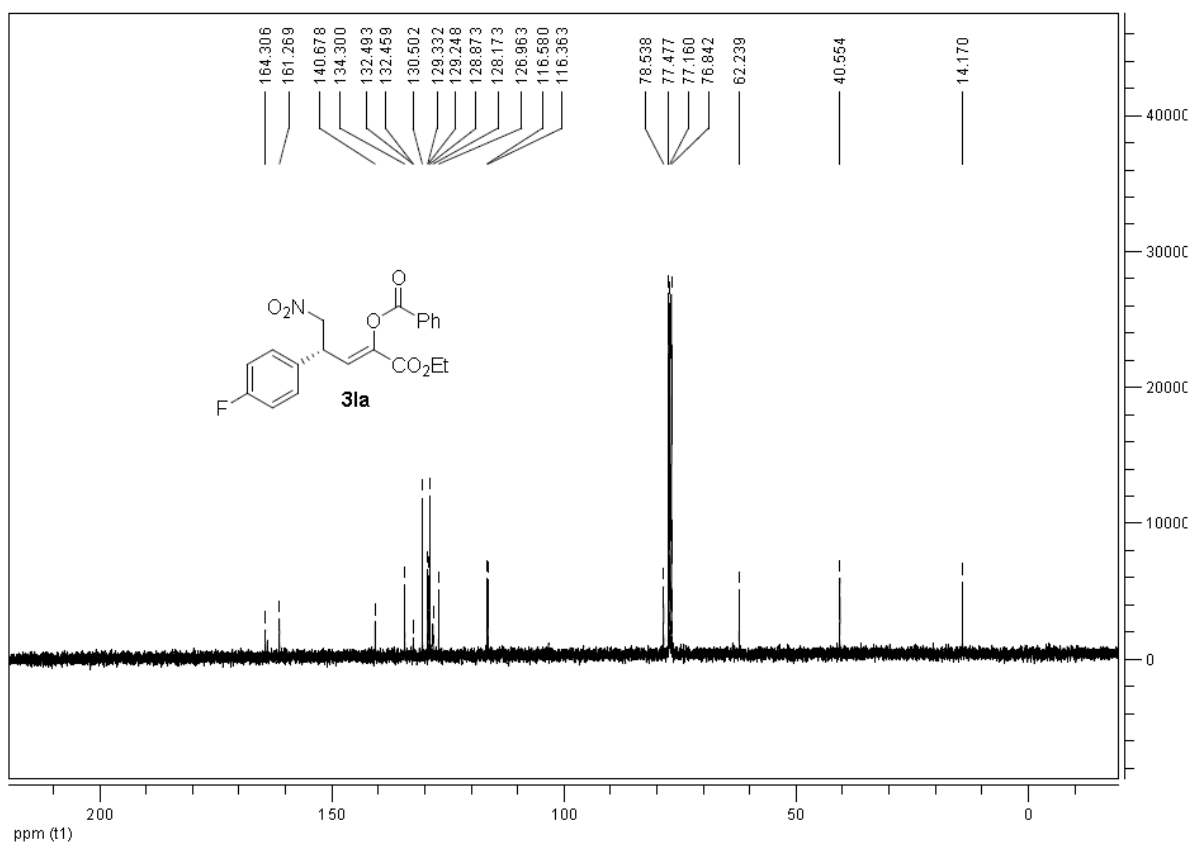



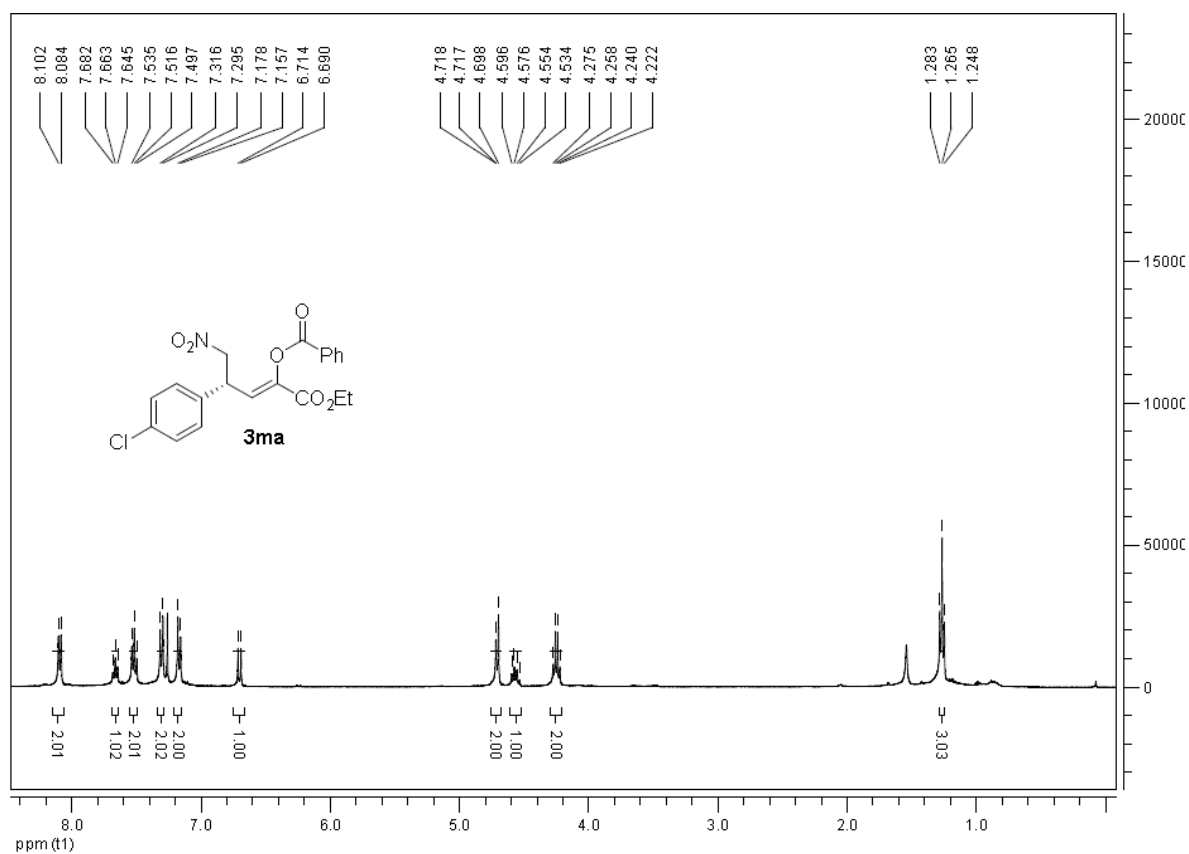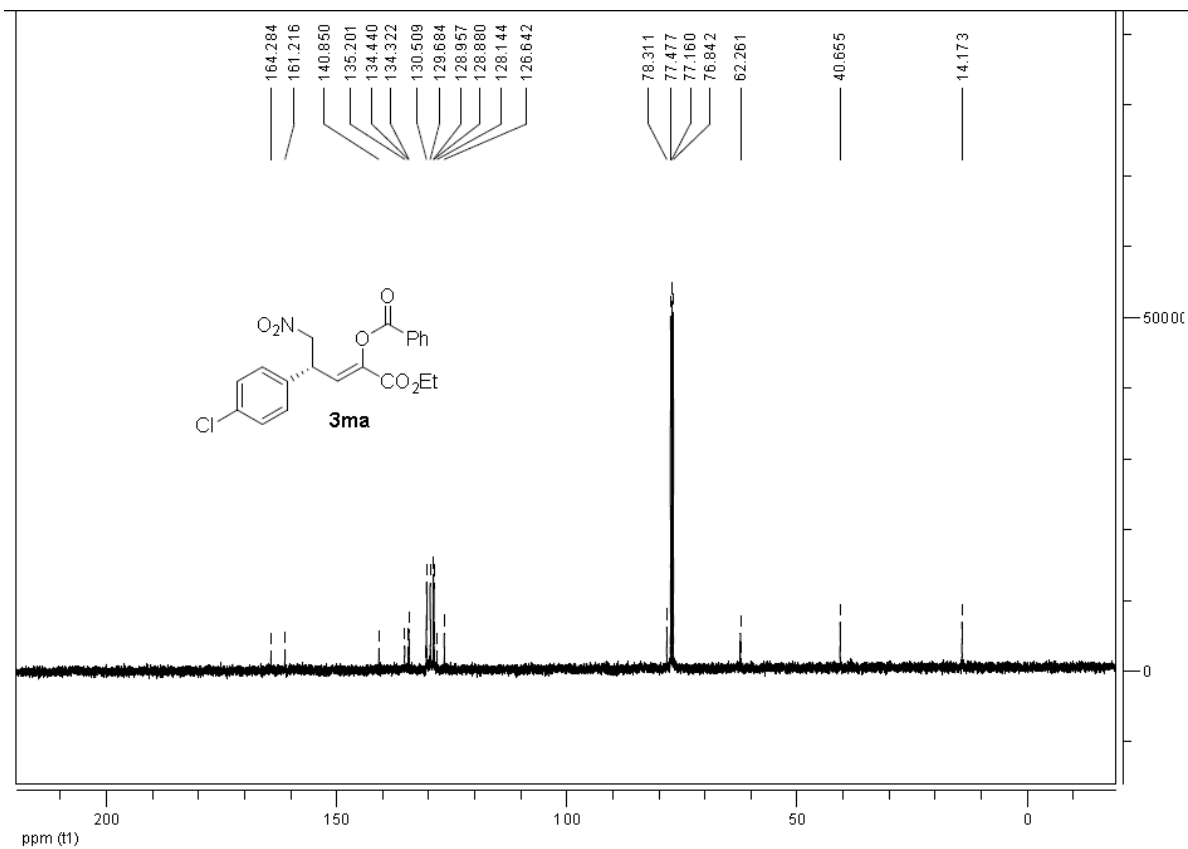

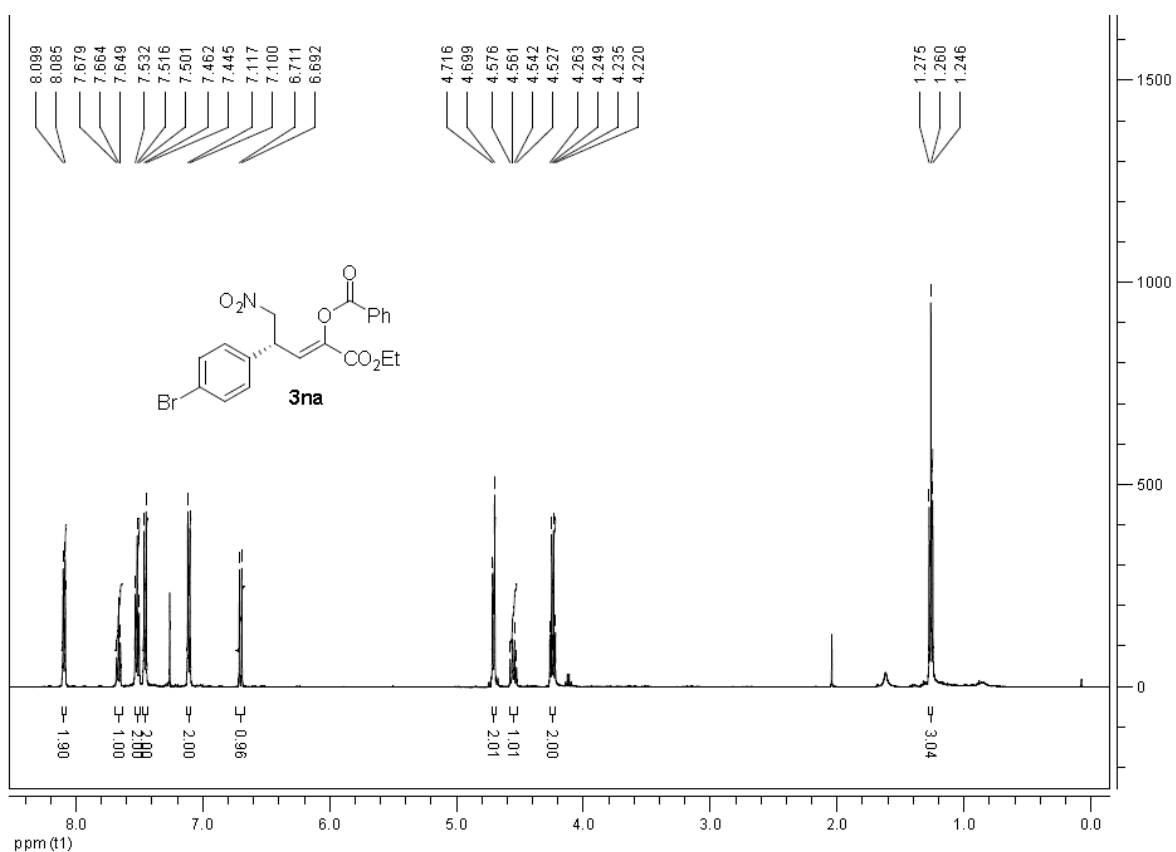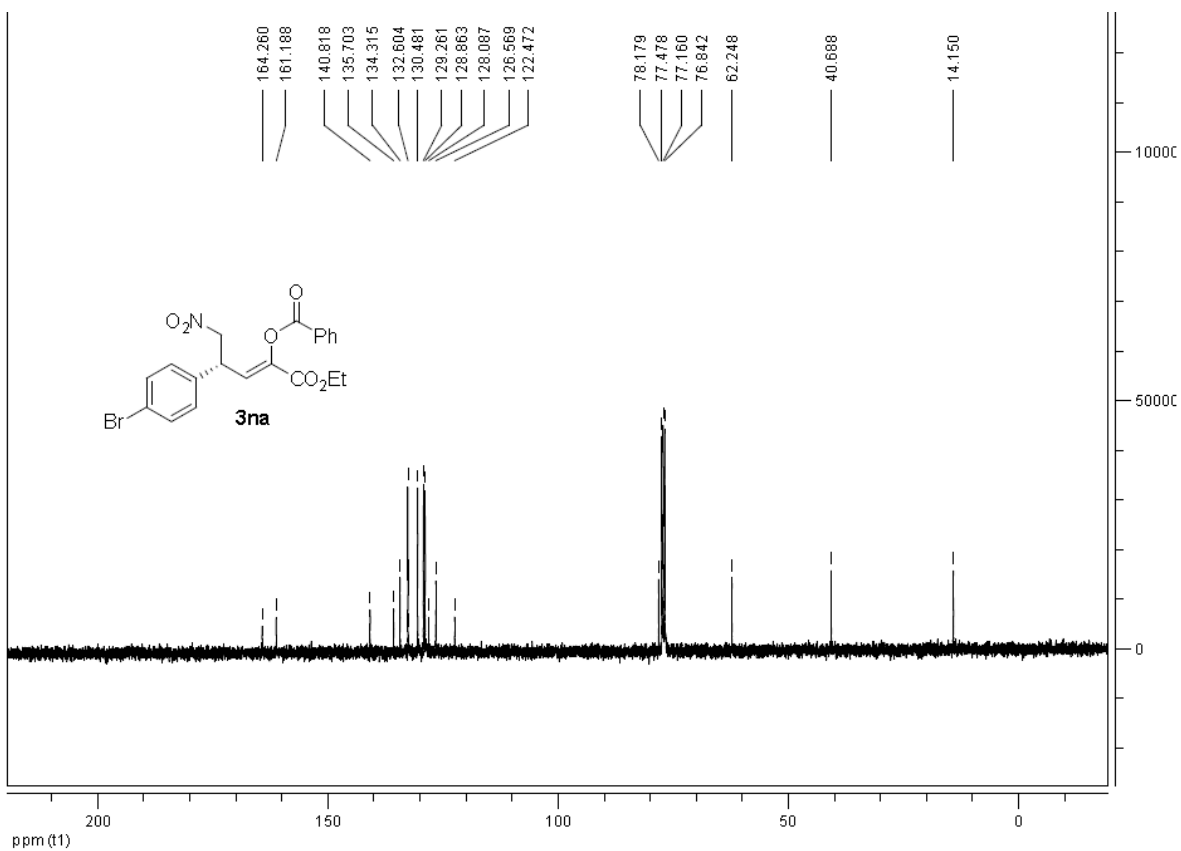

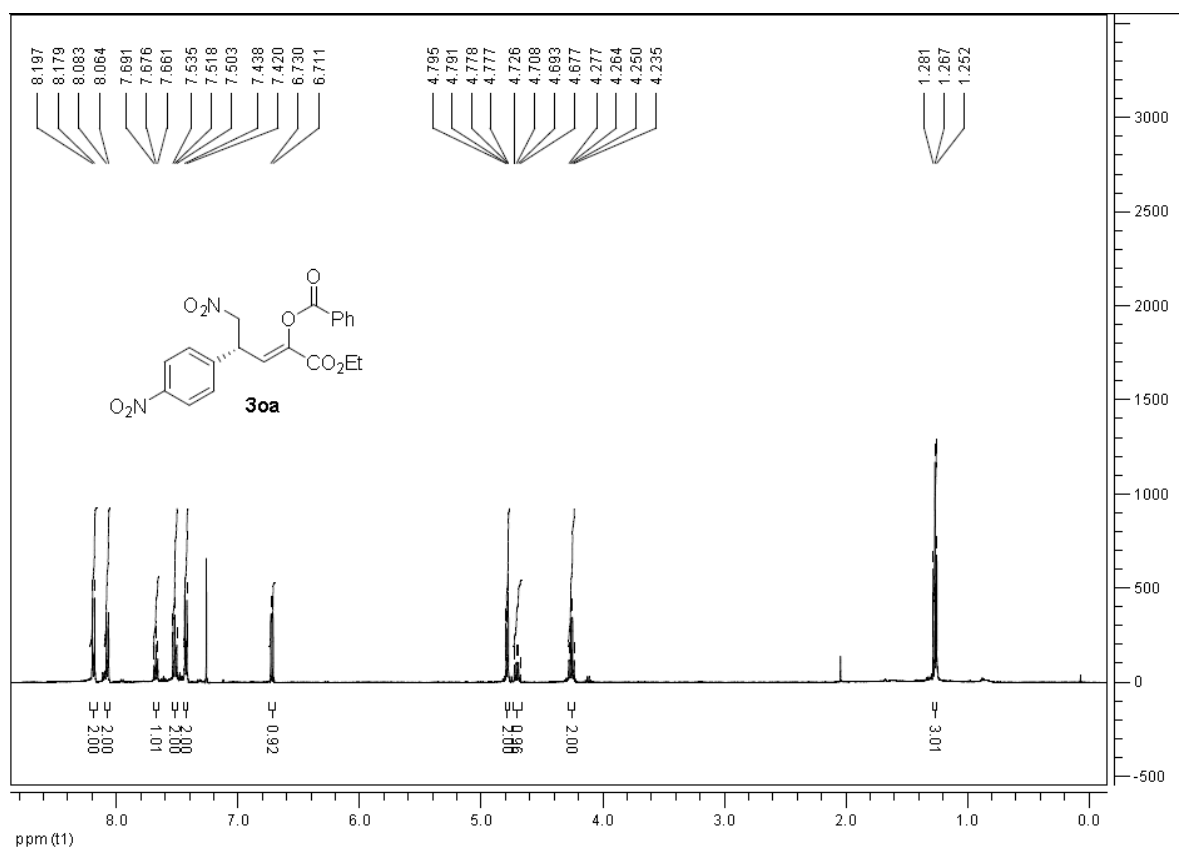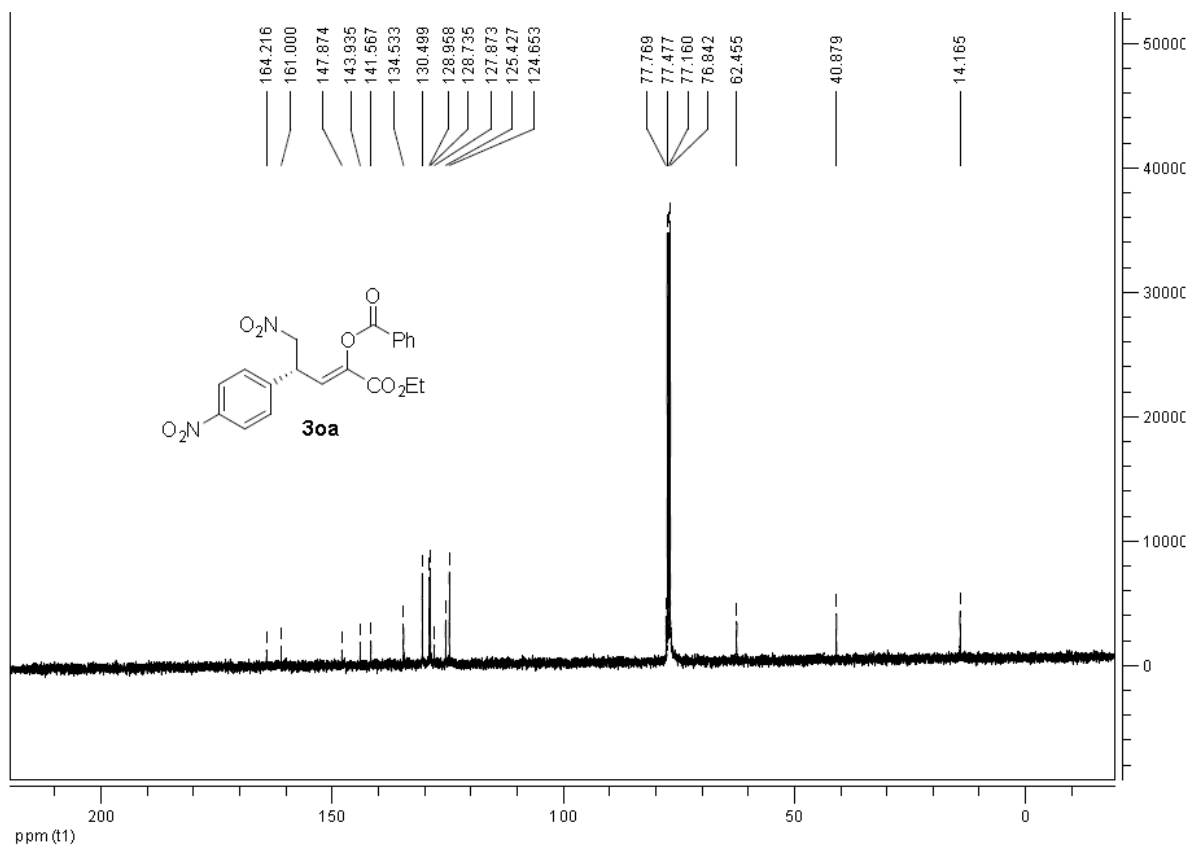

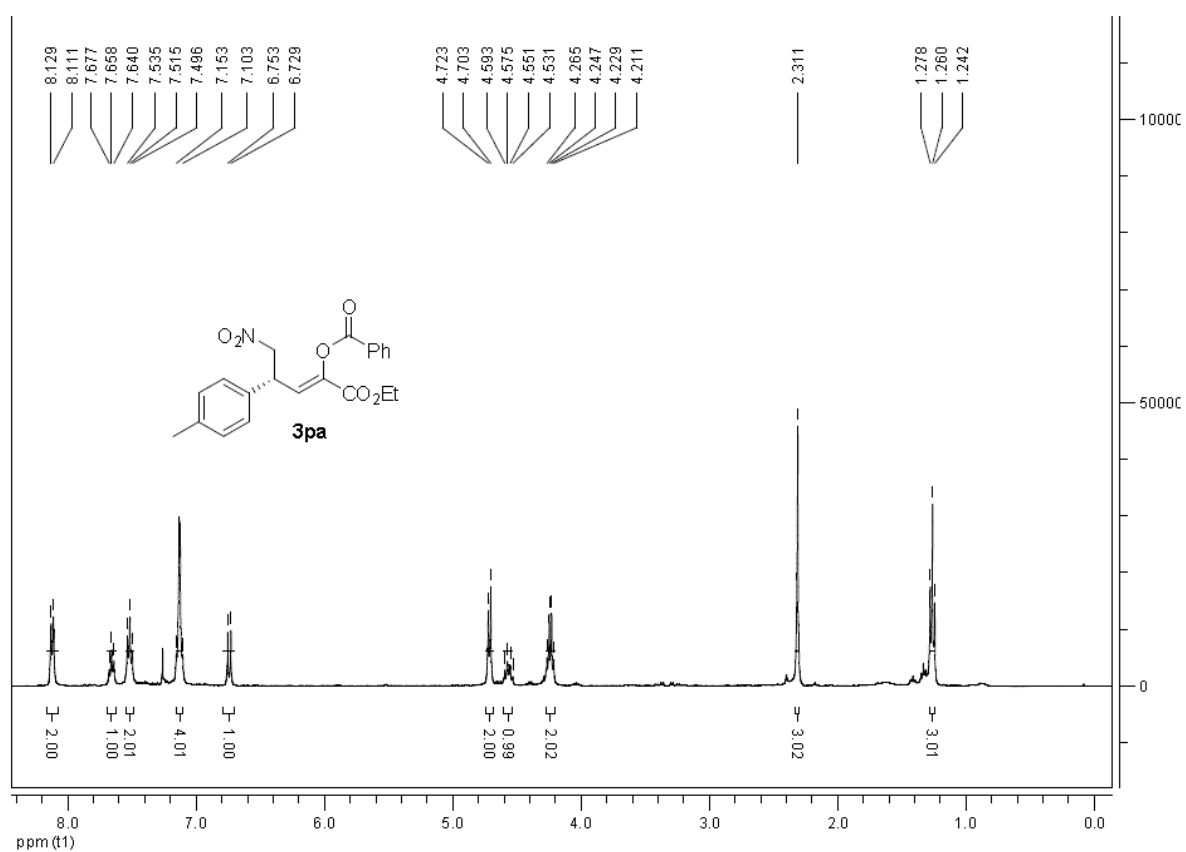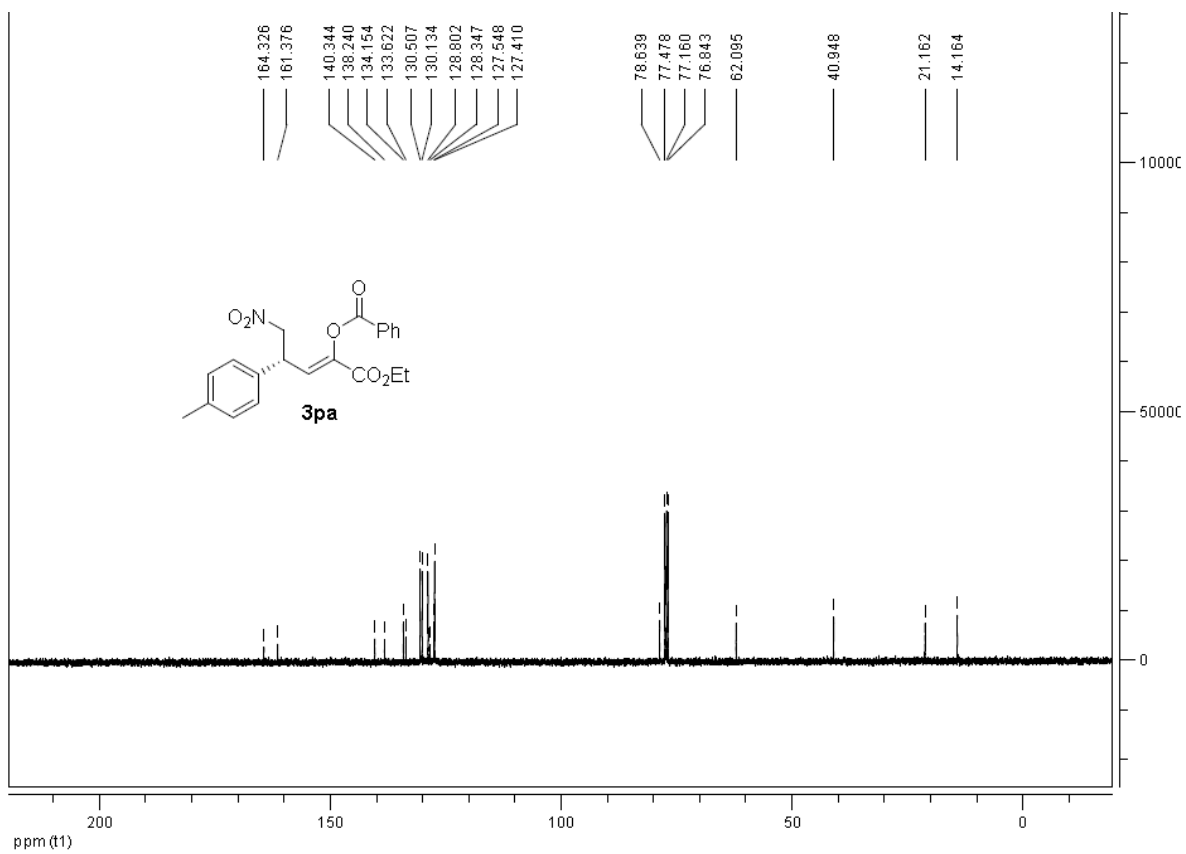

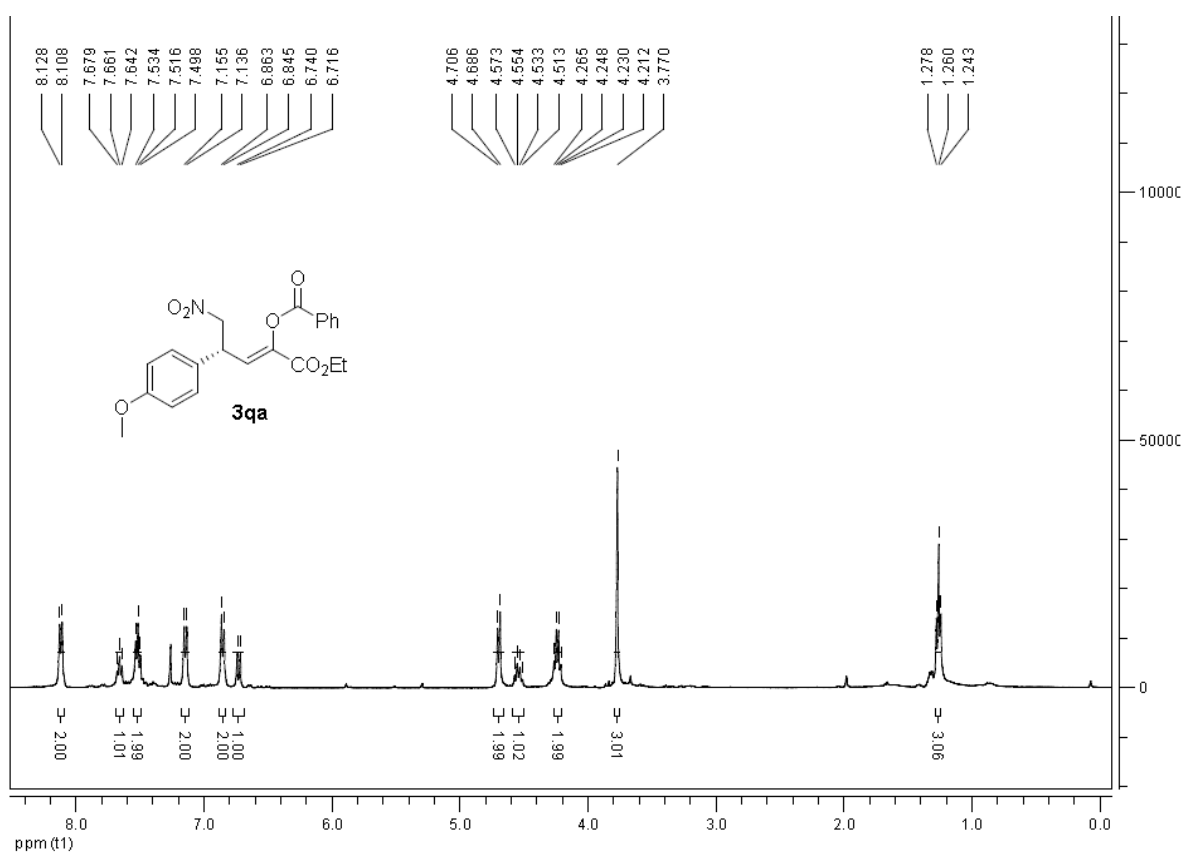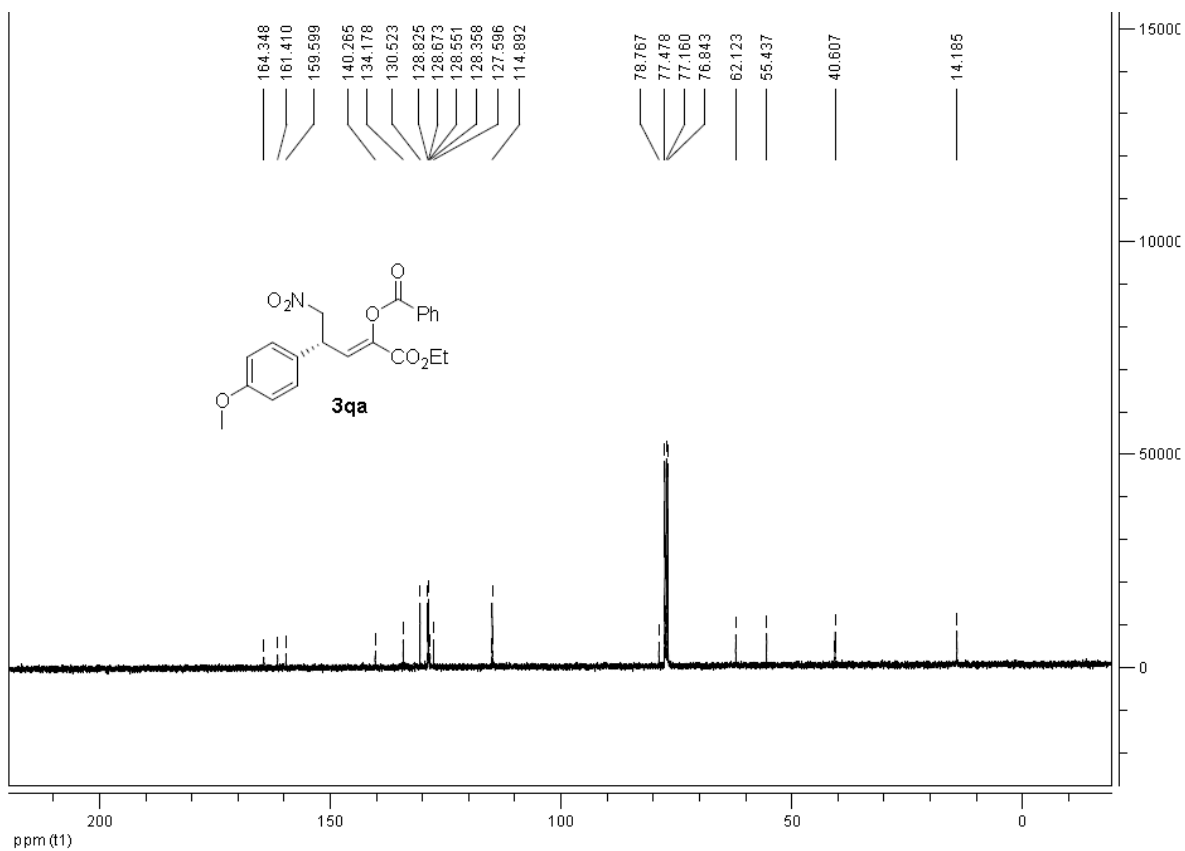

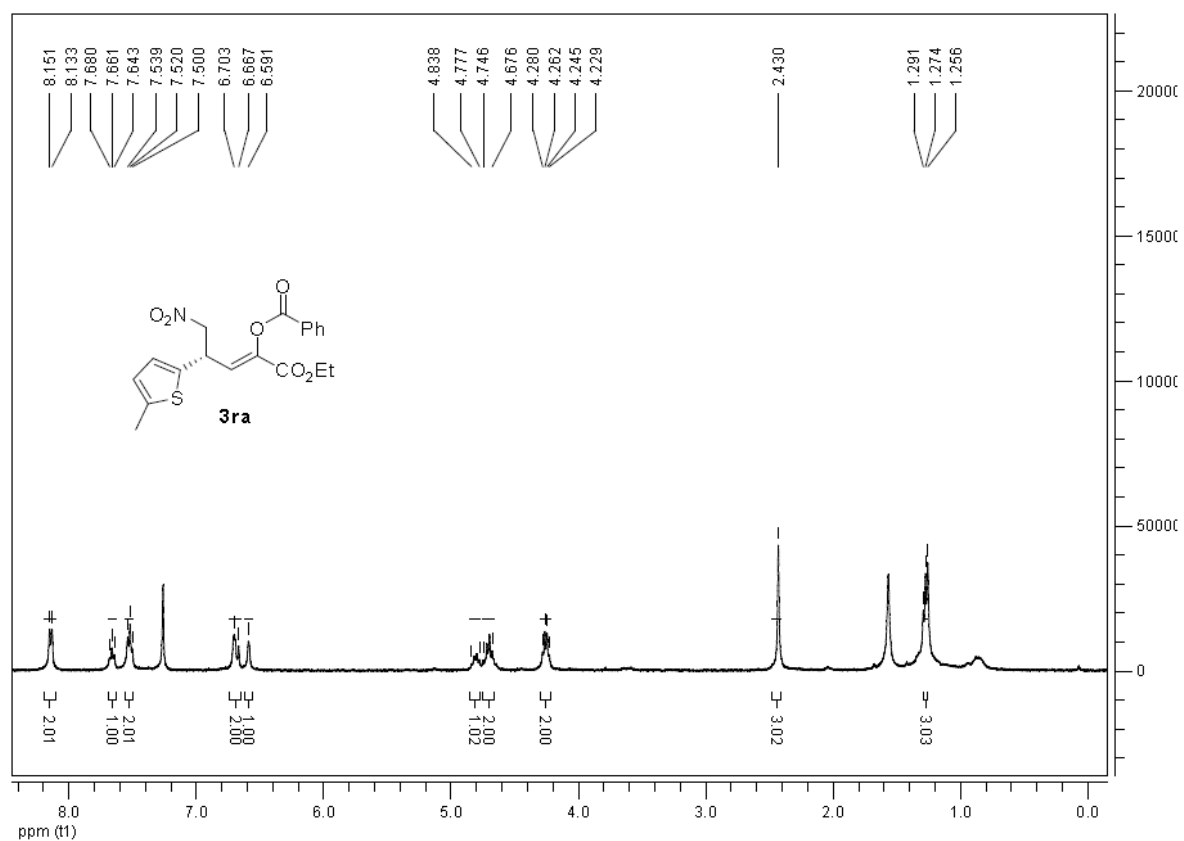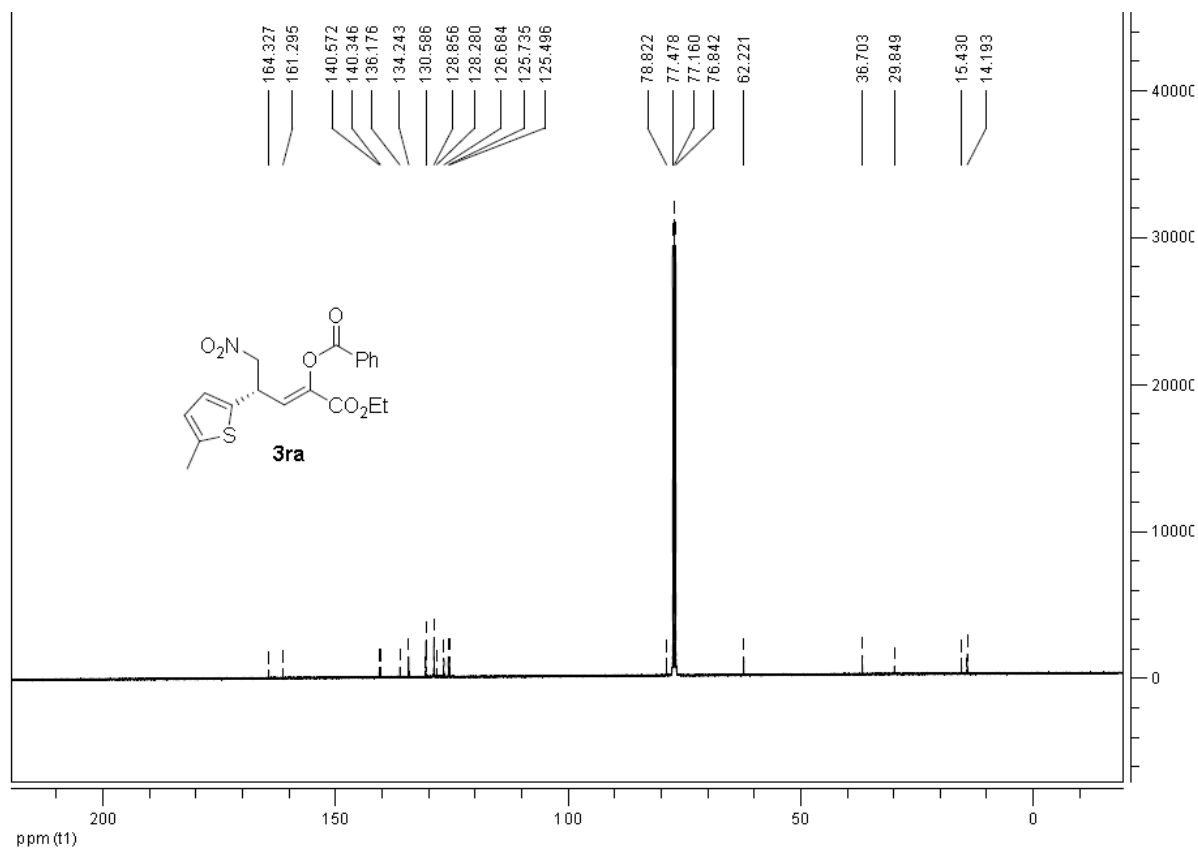

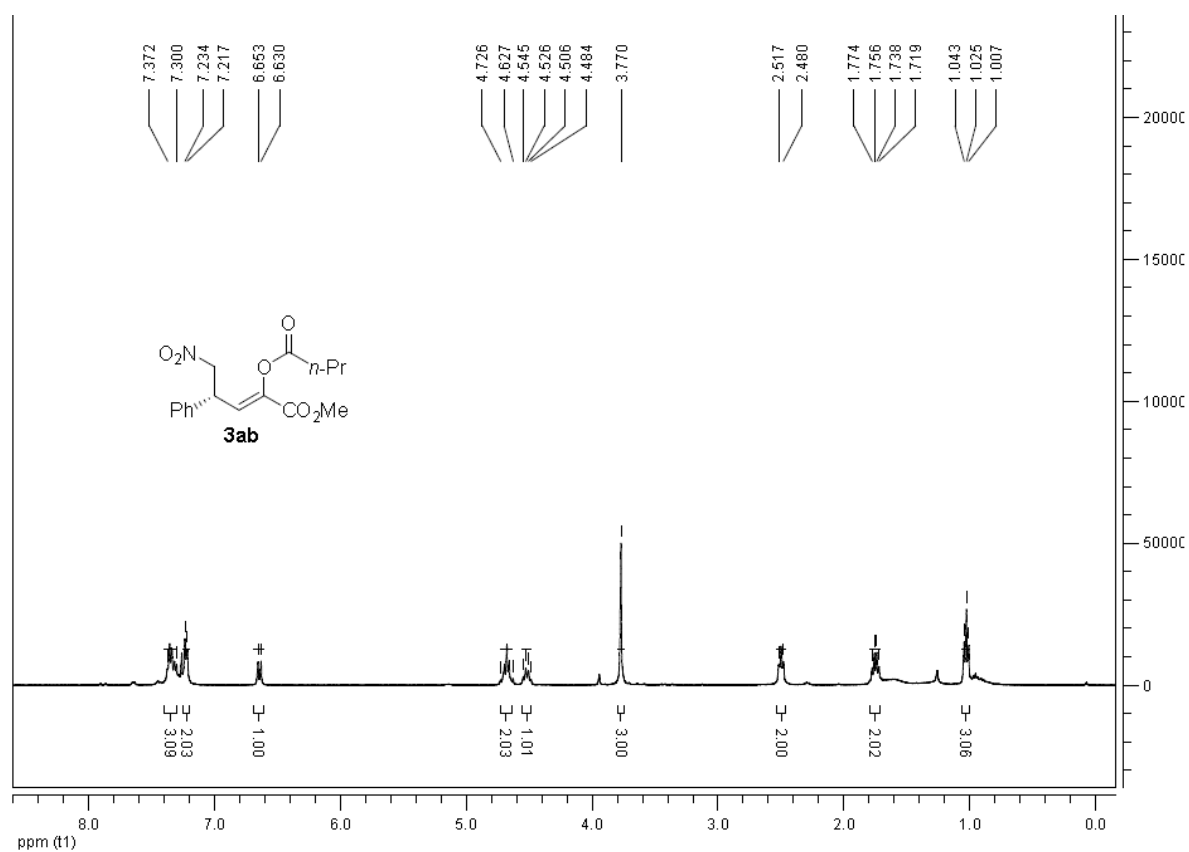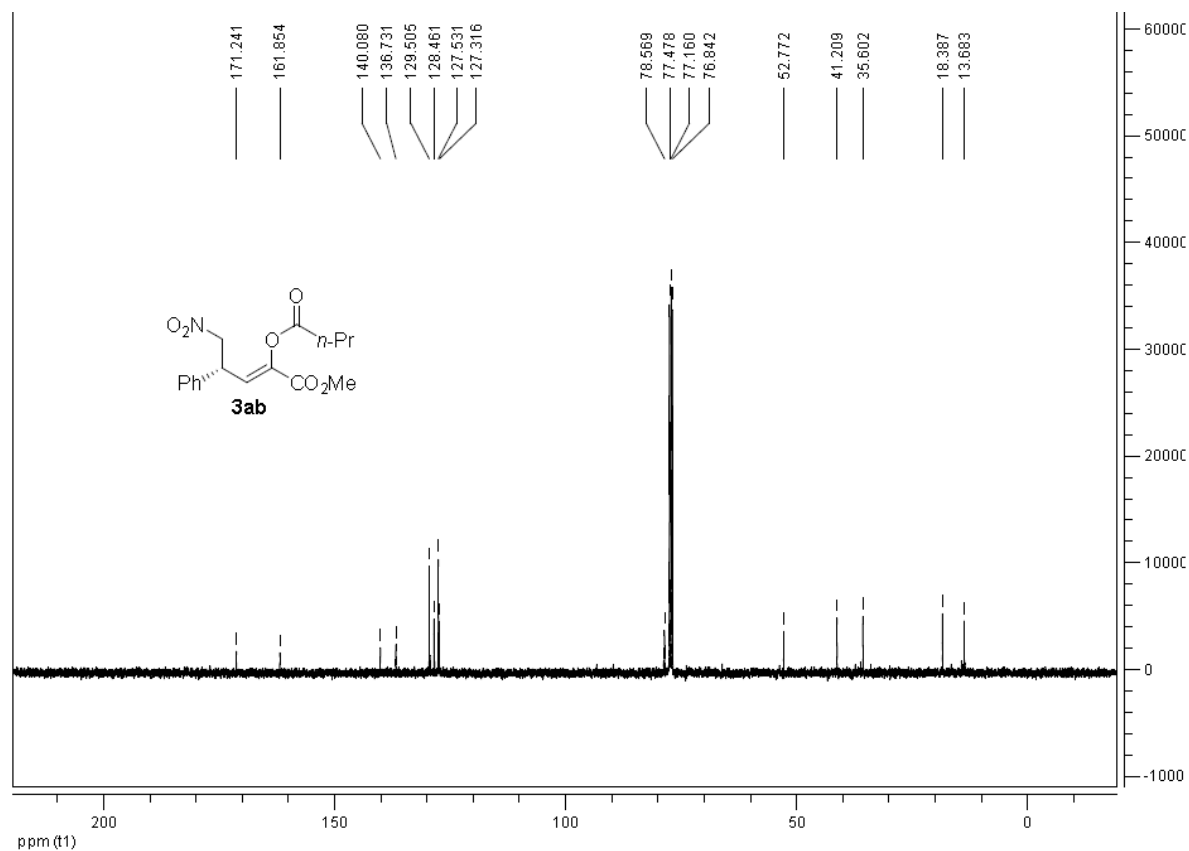

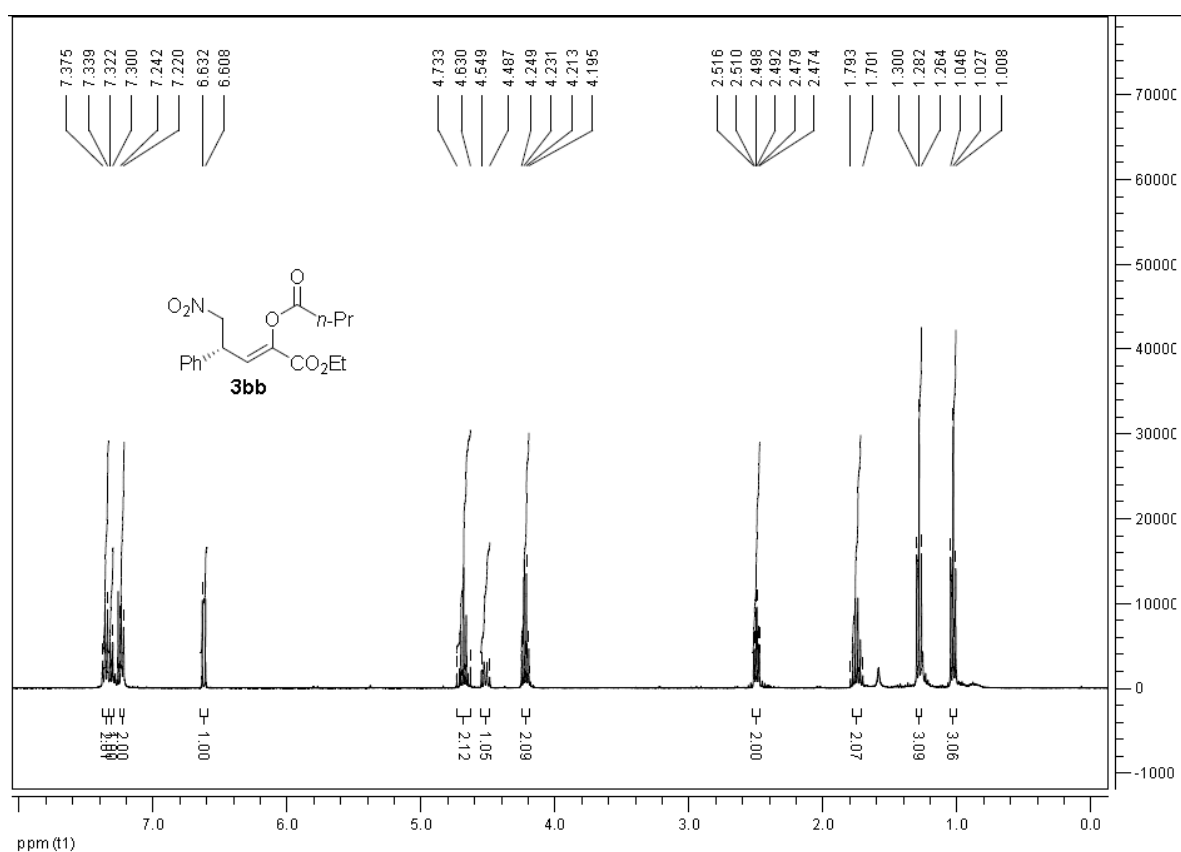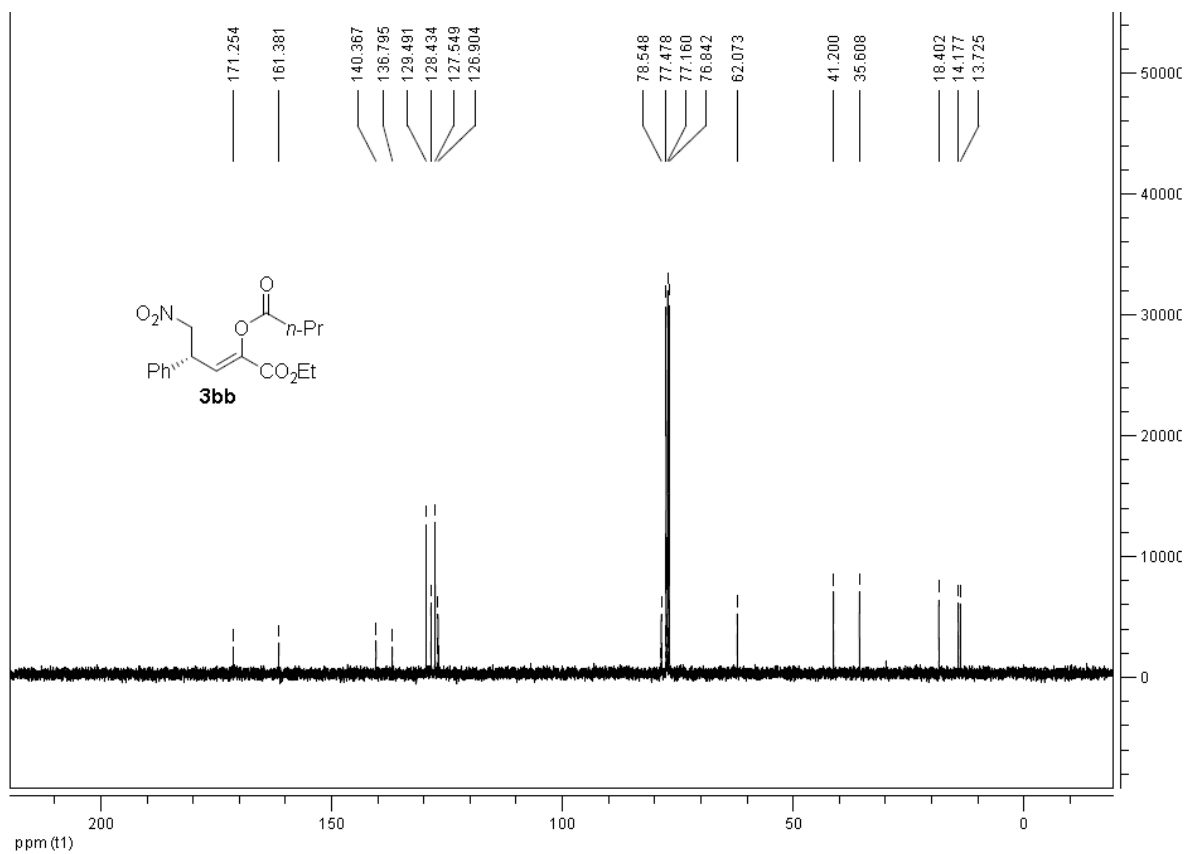



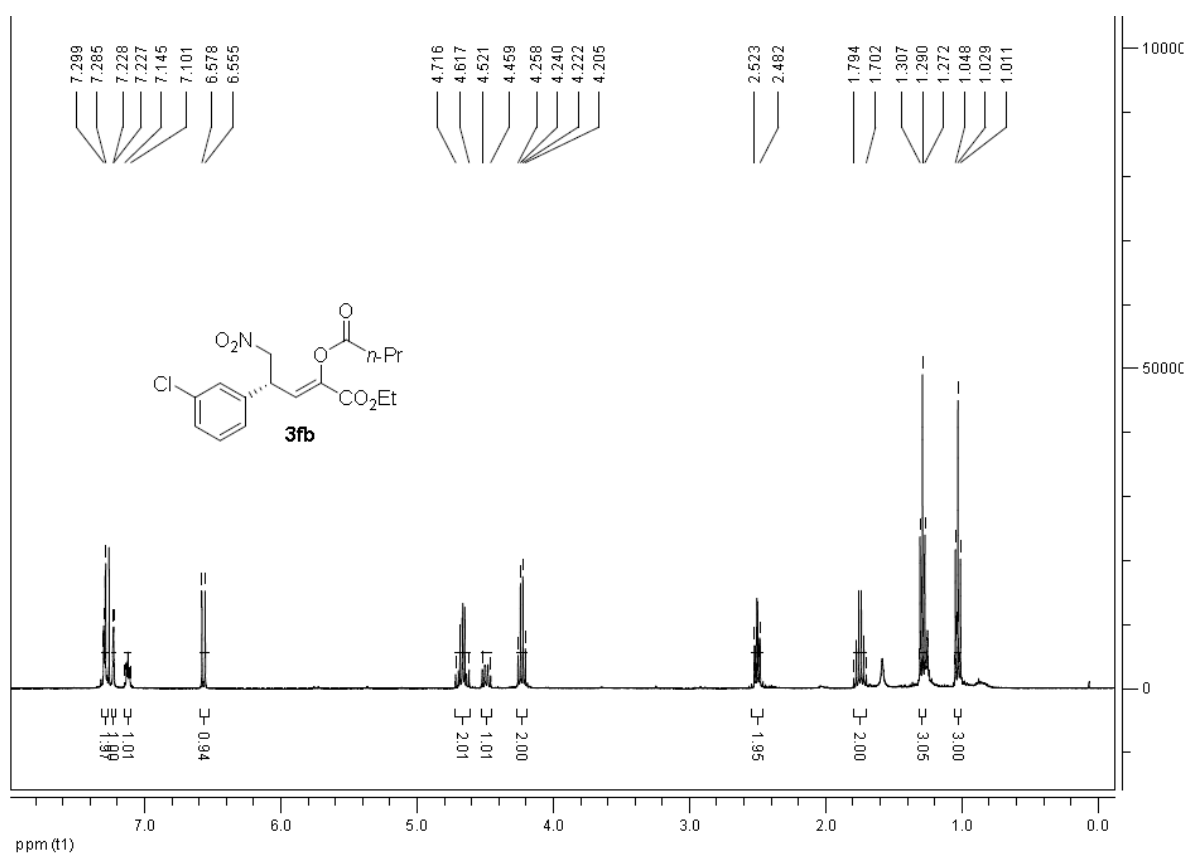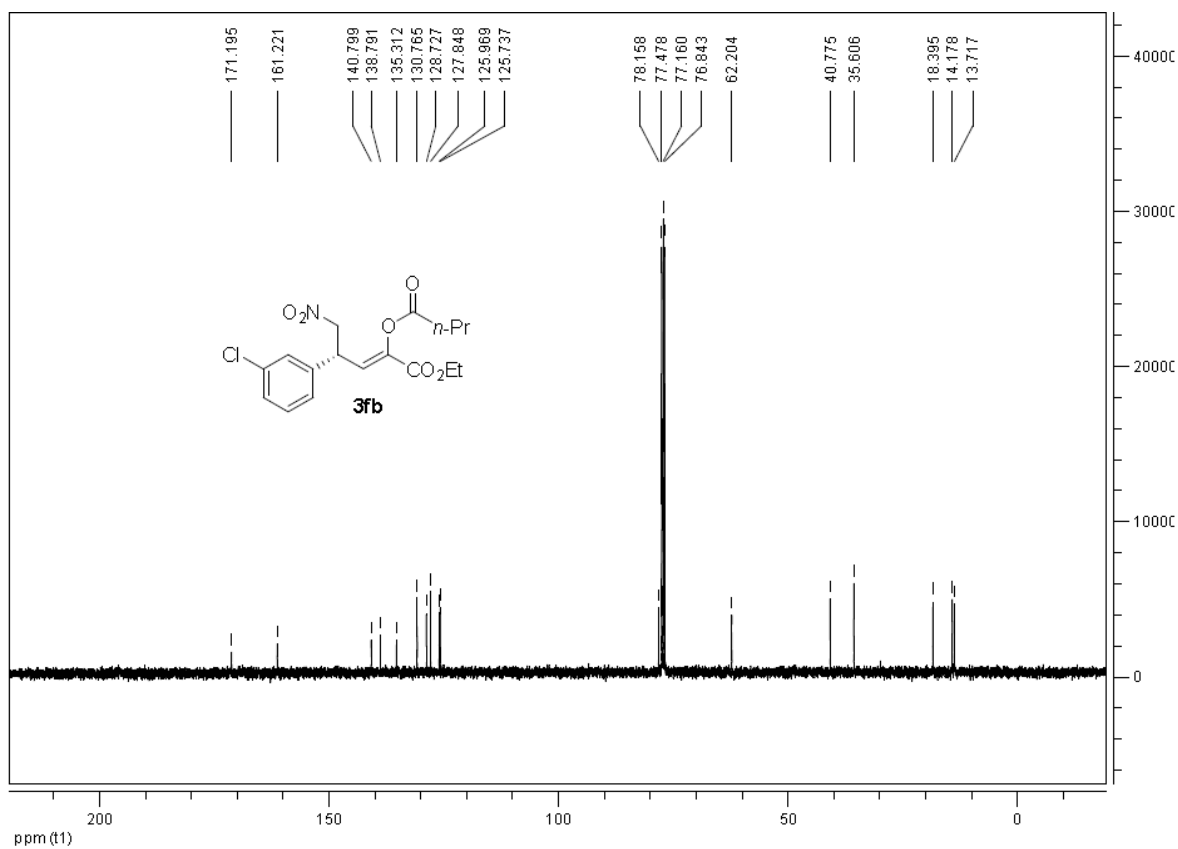

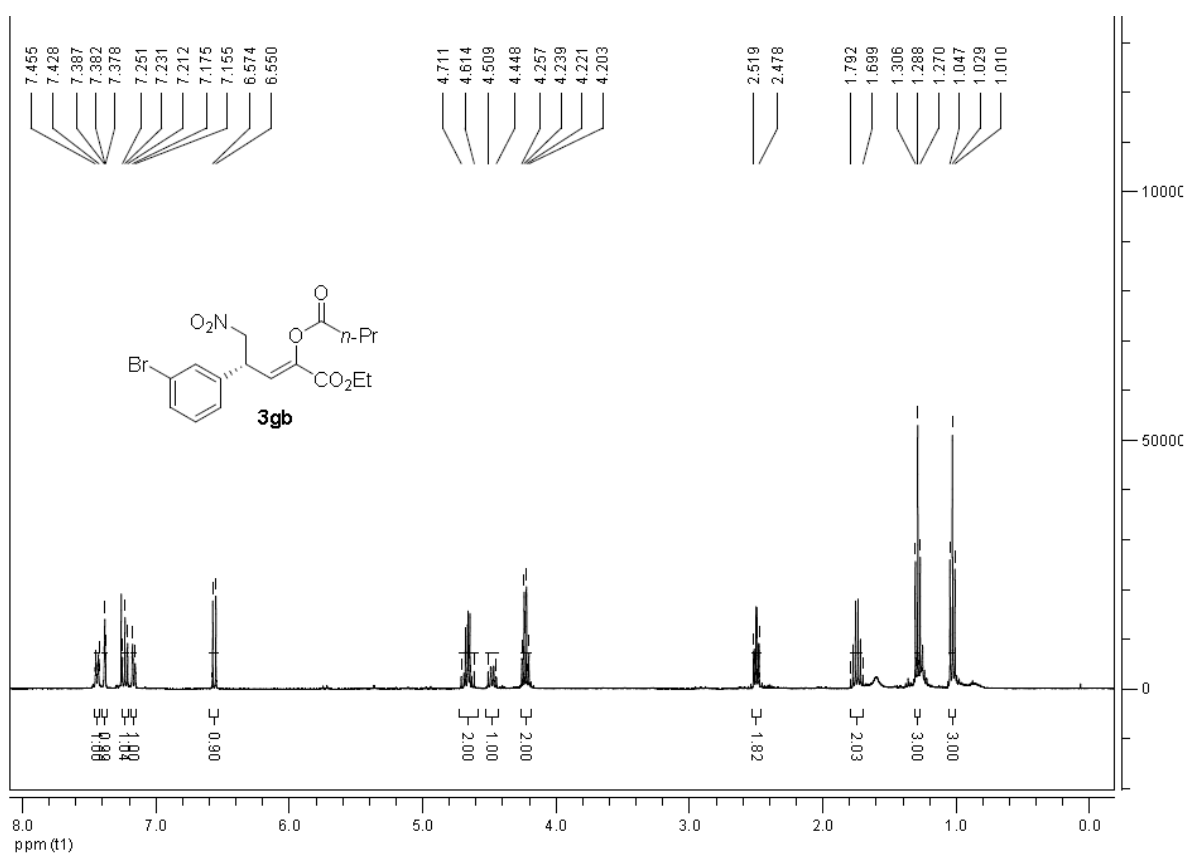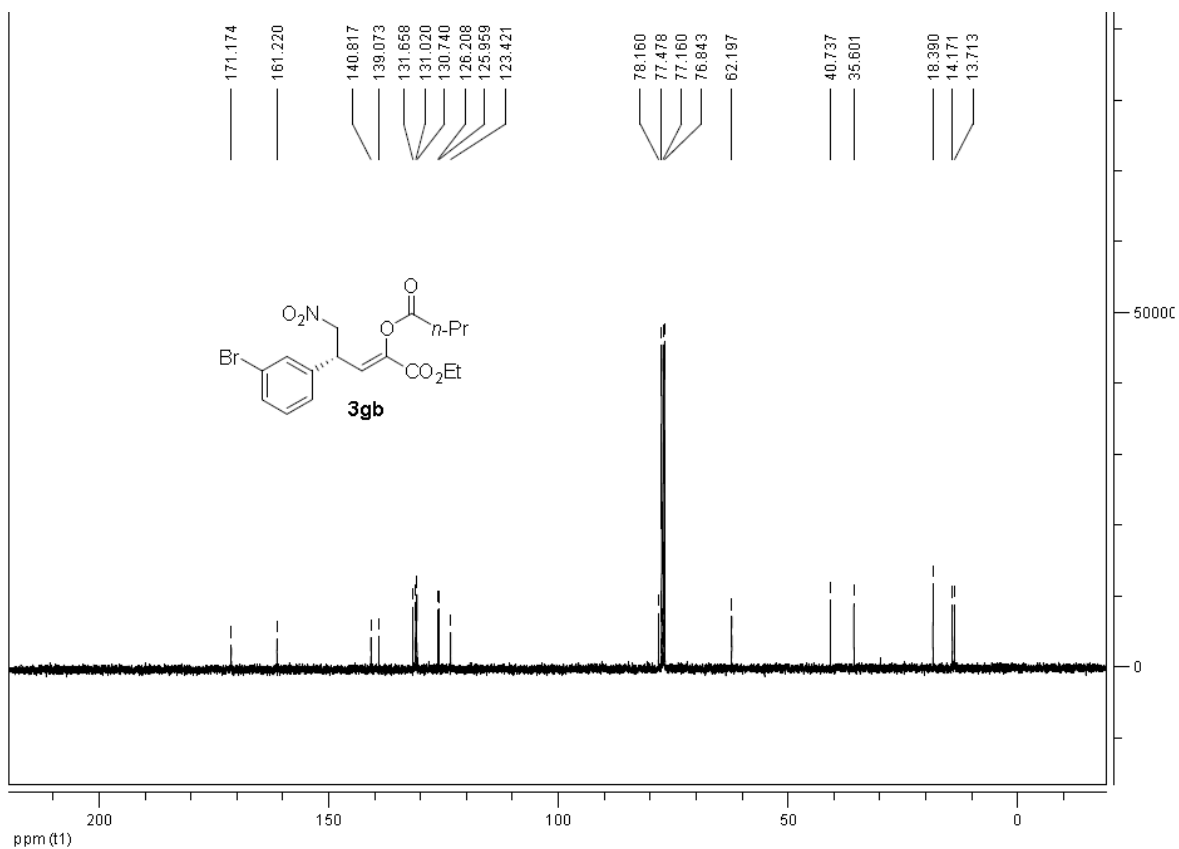

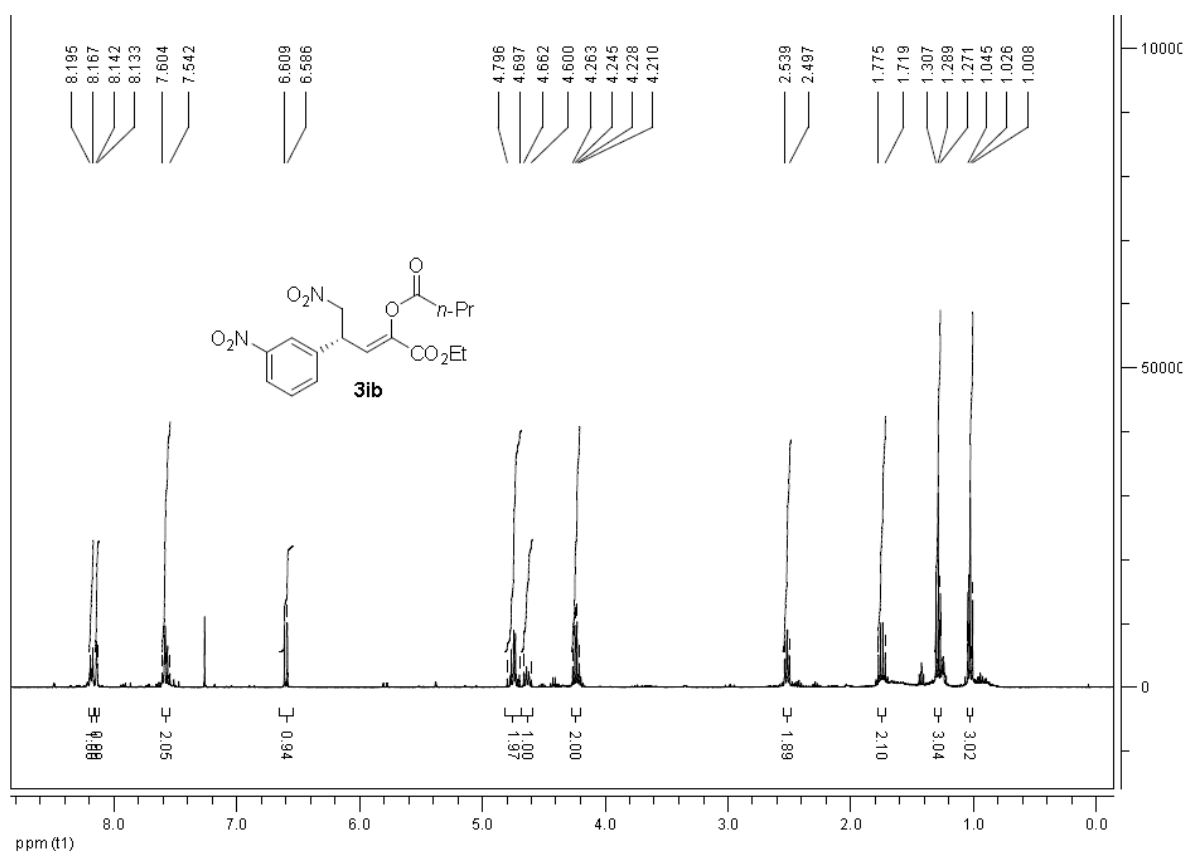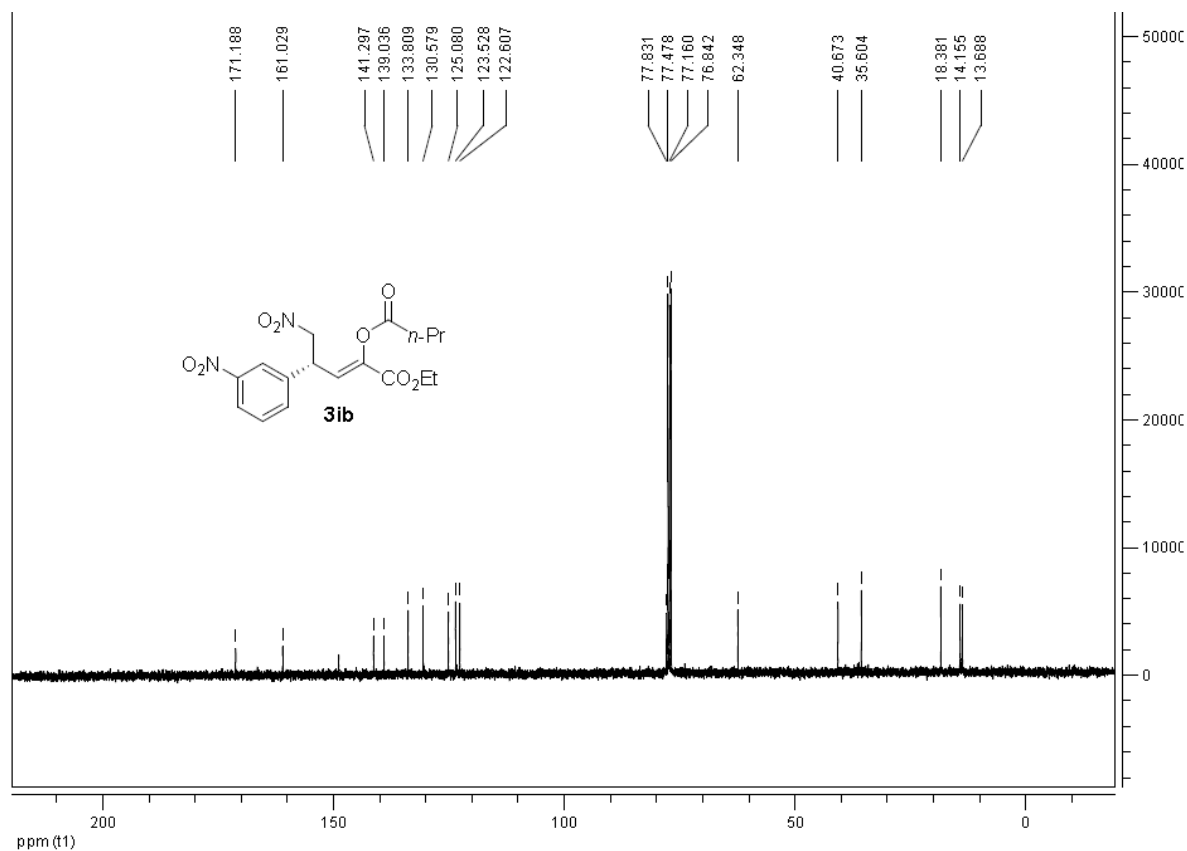

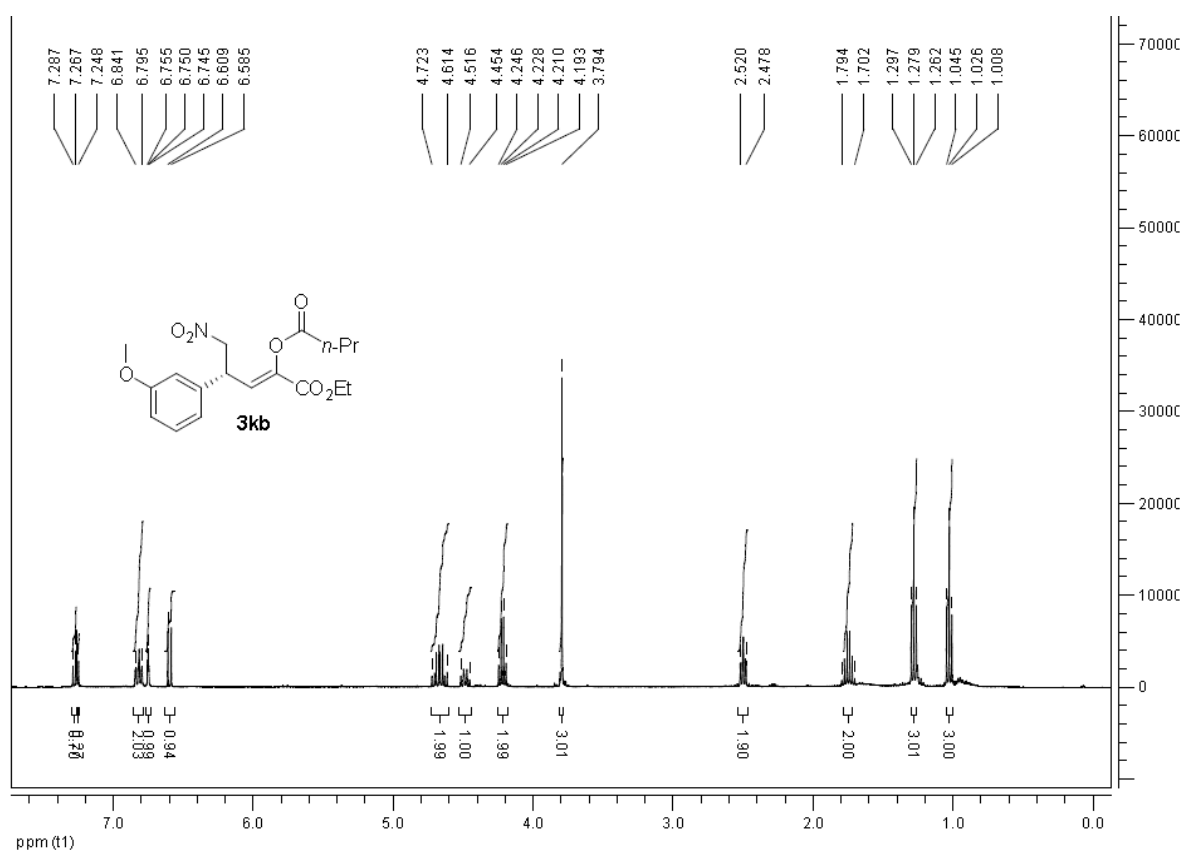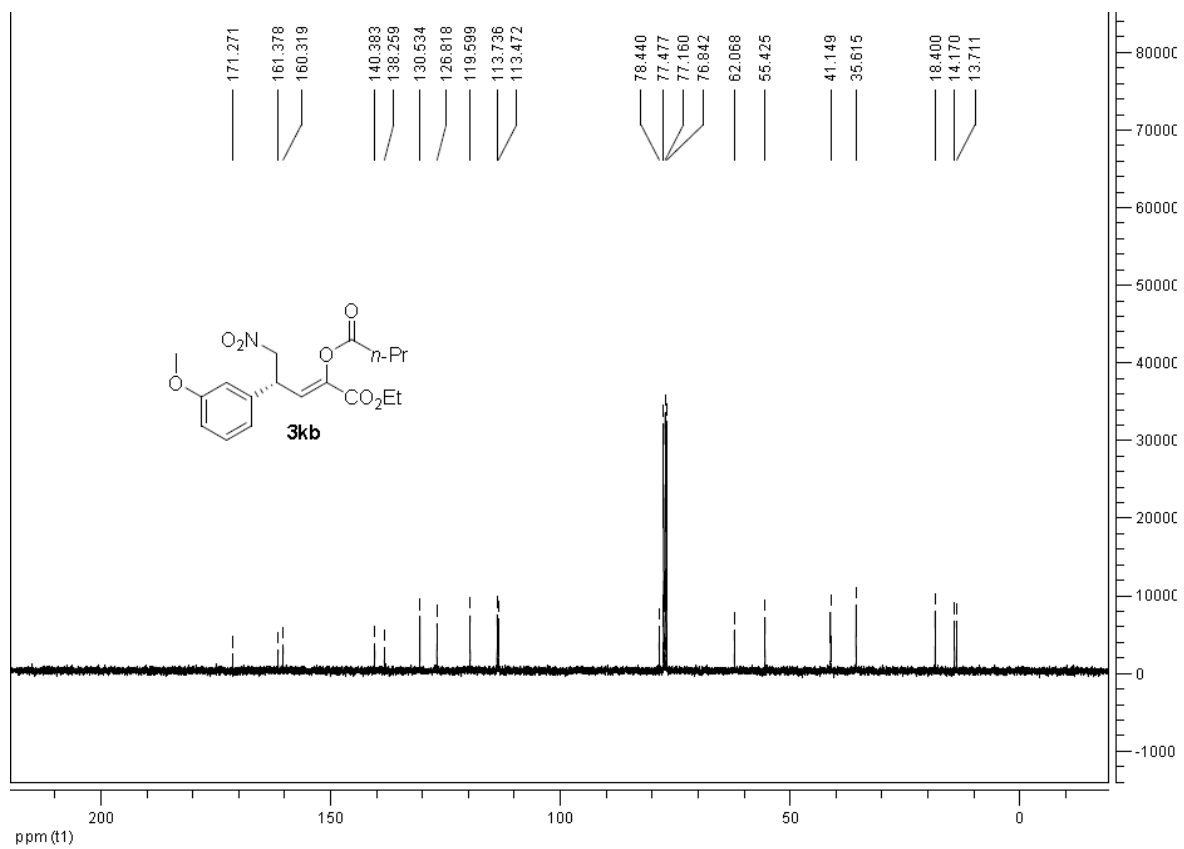

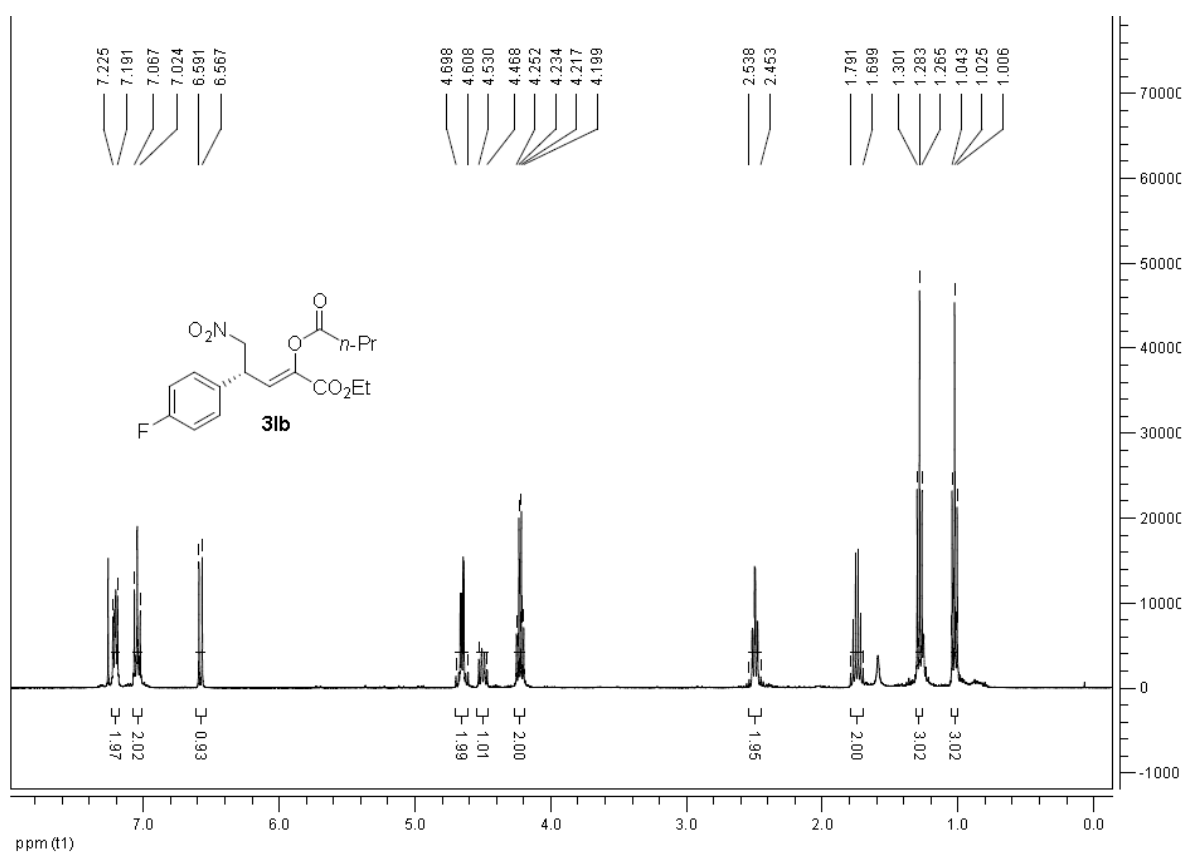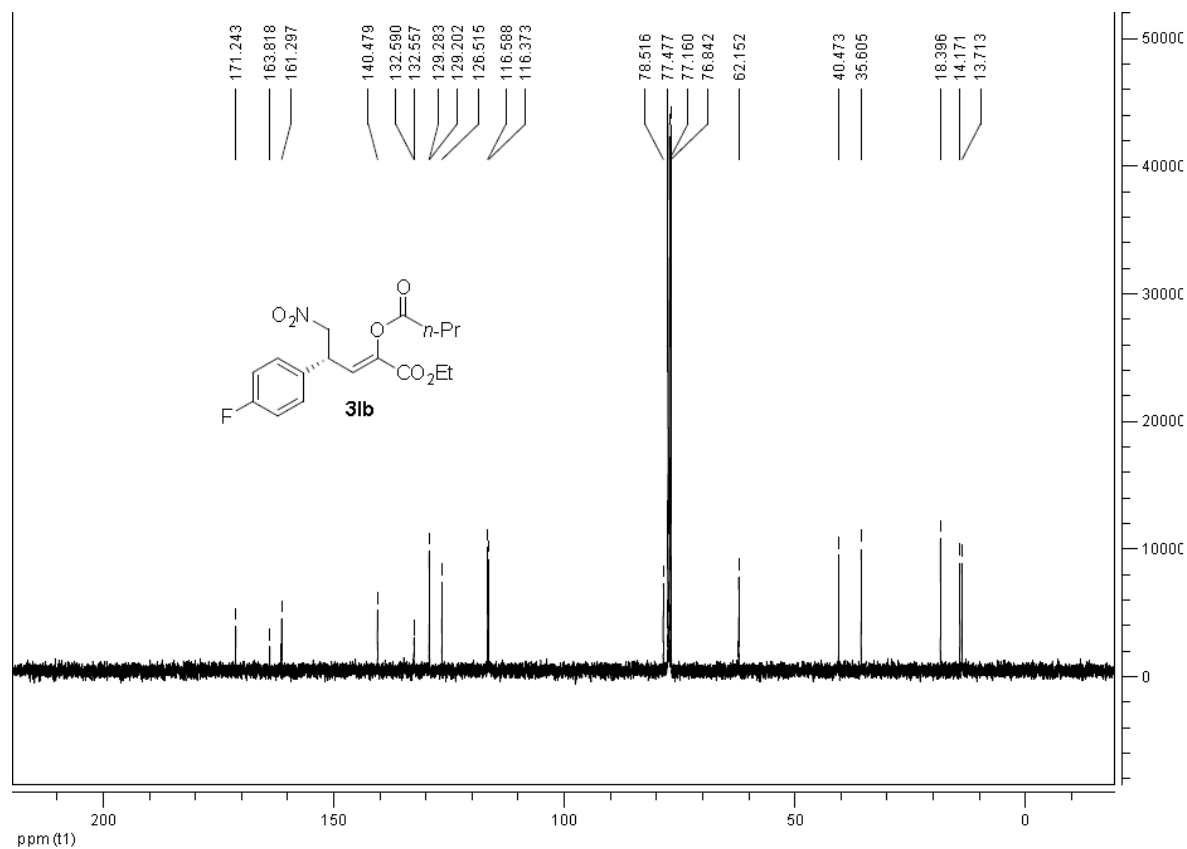

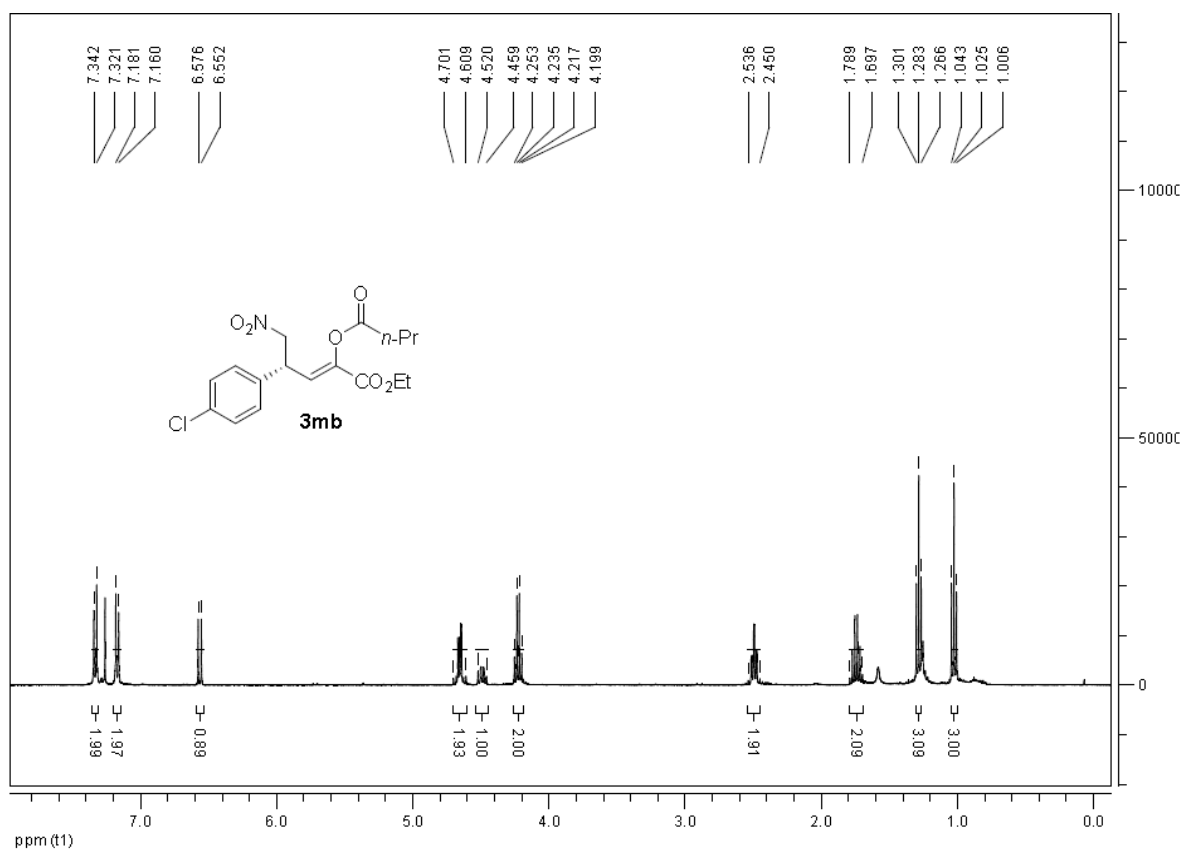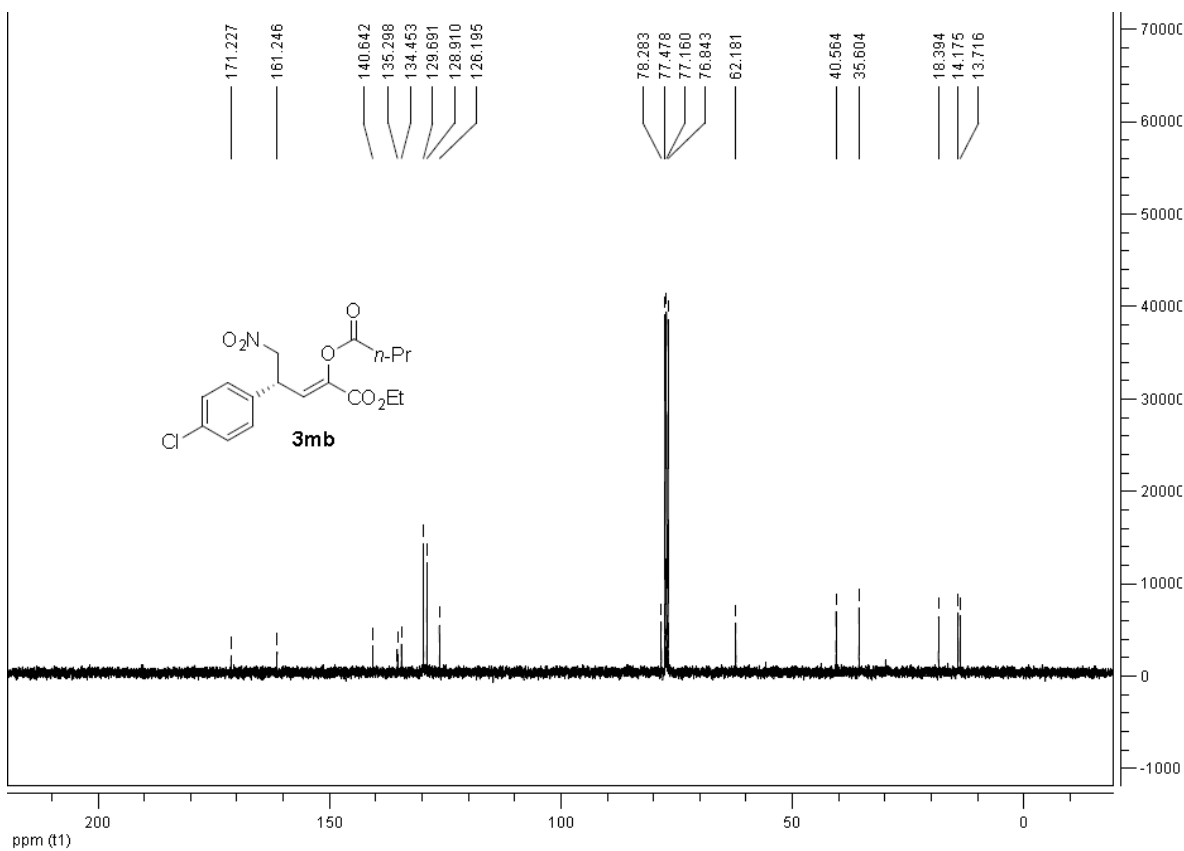

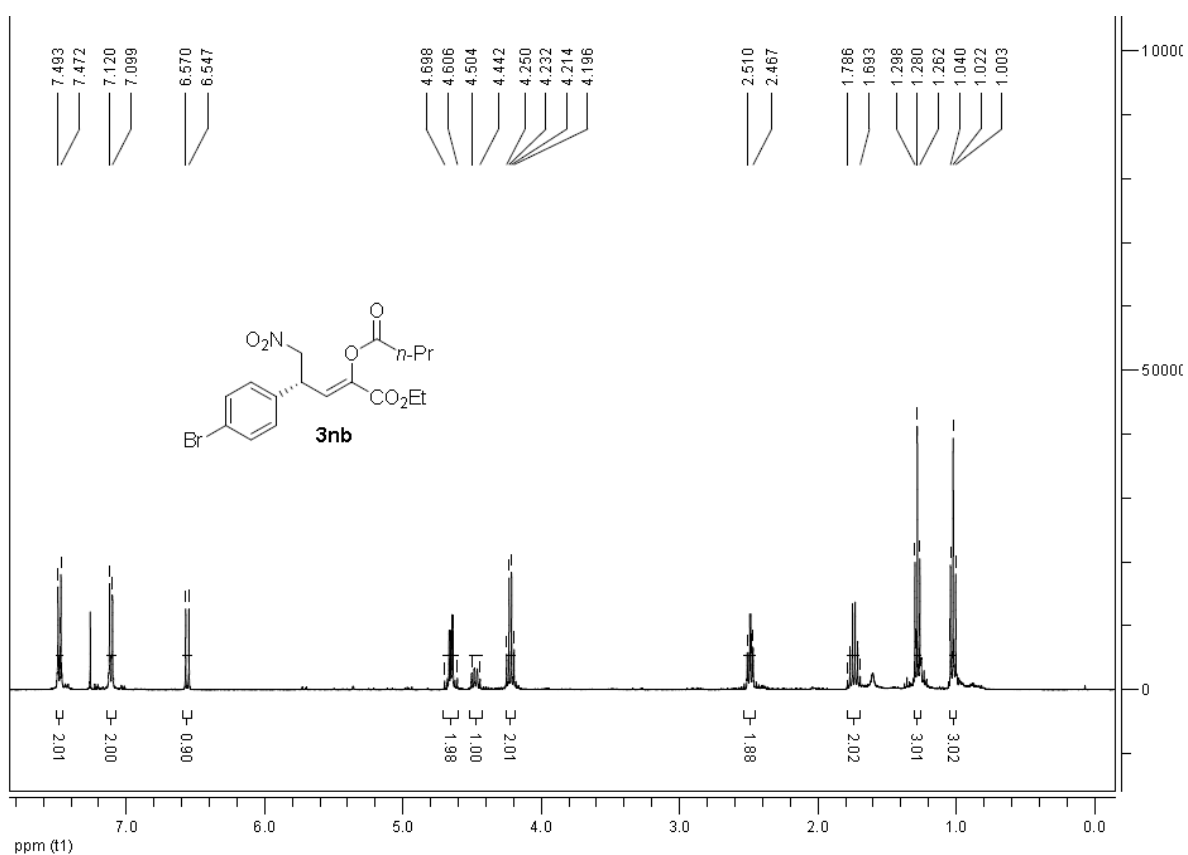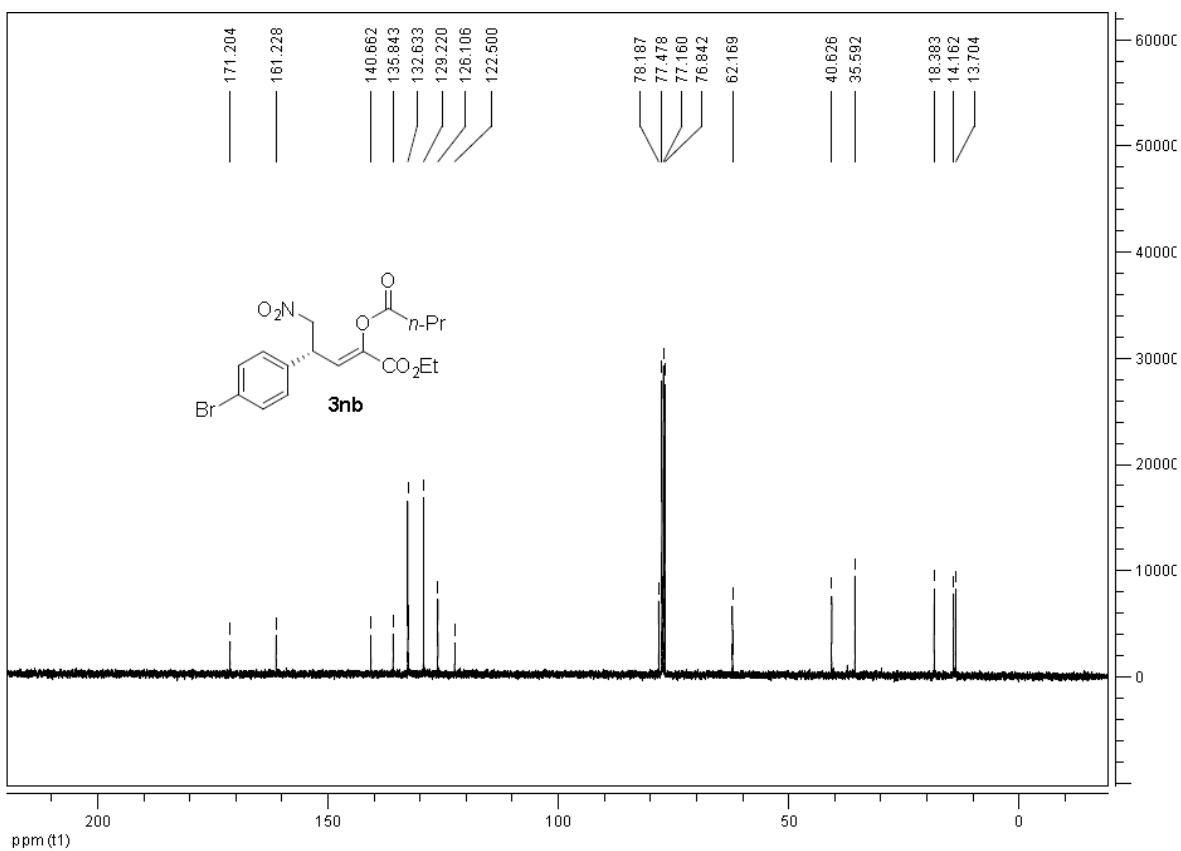

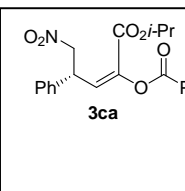

Supporting information

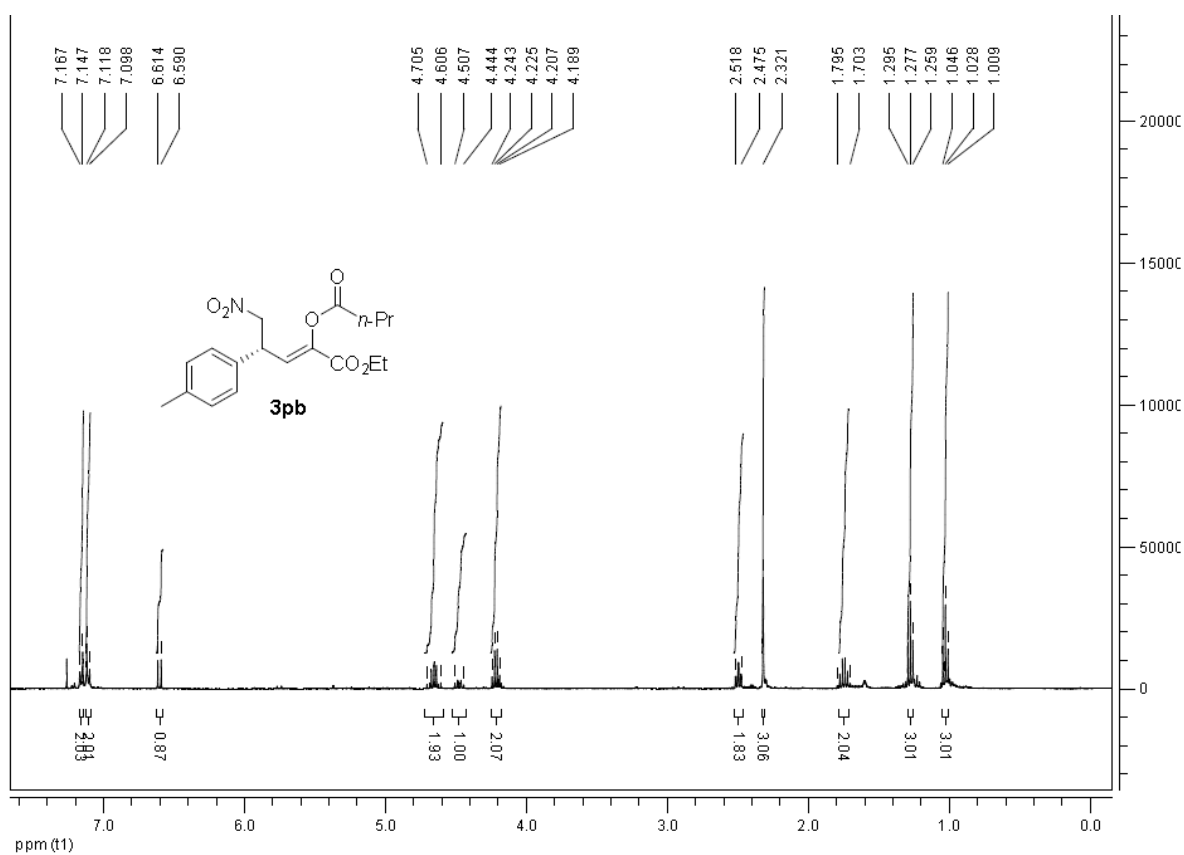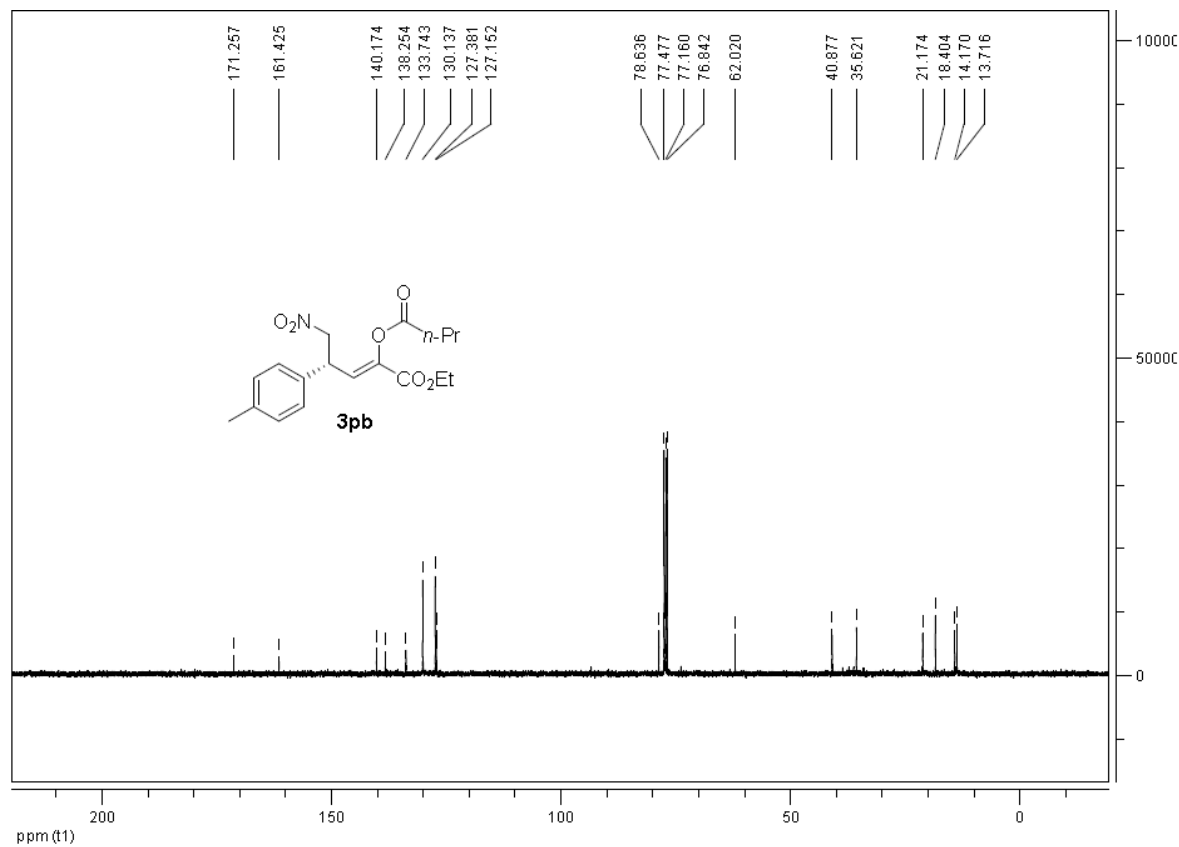

Supplement: c1ob06191g.pdf [file c1ob06191g.pdf]
